# Supplementary material for: Two-photon-absorbing ruthenium complexes enable near infrared light-driven photocatalysis
Source: PubMed Central journal article supplement (PMC9051202; doi:10.1038/s41467-022-29981-3), 2022-04-28
Supplement: 41467_2022_29981_MOESM1_ESM.pdf [file 41467_2022_29981_MOESM1_ESM.pdf]

Supplementary Information for

**Two-photon-absorbing ruthenium complexes enable near infrared light-driven photocatalysis**

Guanqun Han<sup>a</sup>, Guodong Li<sup>a</sup>, Jie Huang<sup>b</sup>, Chuang Han<sup>a</sup>, Claudia Turro<sup>b,\*</sup>, and Yujie Sun<sup>a,\*</sup>

<sup>a</sup>Department of Chemistry, University of Cincinnati, Cincinnati, Ohio, USA

<sup>b</sup>Department of Chemistry & Biochemistry, The Ohio State University, Columbus, Ohio, USA

**Inventory of Supplementary Information**

Supplementary Figures 1-9 are related to the synthesis.

Supplementary Figures 10-25 and Supplementary Tables 1-10 are related to Figure 2 and Table 1.

Supplementary Figures 26-42 are related to Figure 3.

Supplementary Figures 43-49 are related to Figure 4.

## Table of contents

| Content                                                                                                                                                                                                                                                                                                              | Page |
|----------------------------------------------------------------------------------------------------------------------------------------------------------------------------------------------------------------------------------------------------------------------------------------------------------------------|------|
| <b>SUPPLEMENTARY FIGURES</b>                                                                                                                                                                                                                                                                                         | 9    |
| <b>Supplementary Figure 1.</b> Synthetic paths for ligands and complexes <b>1-5</b> .                                                                                                                                                                                                                                | 9    |
| <b>Supplementary Figure 2.</b> $^1\text{H}$ NMR (400 MHz, $\text{CDCl}_3$ , 298 K) (top) and $^{13}\text{C}\{^1\text{H}\}$ NMR (101 MHz, $\text{CDCl}_3$ , 298 K) (bottom) spectra of bpyvp-H in $\text{CDCl}_3$ .                                                                                                   | 10   |
| <b>Supplementary Figure 3.</b> $^1\text{H}$ NMR (400 MHz, $\text{CDCl}_3$ , 298 K) (top), $^{19}\text{F}$ NMR (376 MHz, $\text{CDCl}_3$ , 298 K) (middle), and $^{13}\text{C}\{^1\text{H}\}$ NMR (101 MHz, $\text{CDCl}_3$ , 298 K) (bottom) spectra of bpyvp-F in $\text{CDCl}_3$ .                                 | 11   |
| <b>Supplementary Figure 4.</b> $^1\text{H}$ NMR (400 MHz, $\text{CDCl}_3$ , 298 K) (top) and $^{13}\text{C}\{^1\text{H}\}$ NMR (101 MHz, $\text{CDCl}_3$ , 298 K) (bottom) spectra of bpyvp-OMe in $\text{CDCl}_3$ .                                                                                                 | 13   |
| <b>Supplementary Figure 5.</b> $^1\text{H}$ NMR (400 MHz, $\text{CD}_3\text{CN}$ , 298 K) (top) and $^{13}\text{C}\{^1\text{H}\}$ NMR (101 MHz, $\text{CD}_3\text{CN}$ , 298 K) (bottom) spectra of <b>1</b> in $\text{CD}_3\text{CN}$ .                                                                             | 14   |
| <b>Supplementary Figure 6.</b> $^1\text{H}$ NMR (400 MHz, $\text{CD}_3\text{CN}$ , 298 K) (top) and $^{13}\text{C}\{^1\text{H}\}$ NMR (101 MHz, $\text{CD}_3\text{CN}$ , 298 K) (bottom) spectra of <b>2</b> in $\text{CD}_3\text{CN}$ .                                                                             | 15   |
| <b>Supplementary Figure 7.</b> $^1\text{H}$ NMR (400 MHz, $\text{CD}_3\text{CN}$ , 298 K) (top) and $^{13}\text{C}\{^1\text{H}\}$ NMR (101 MHz, $\text{CD}_3\text{CN}$ , 298 K) (bottom) spectra of <b>3</b> in $\text{CD}_3\text{CN}$ .                                                                             | 16   |
| <b>Supplementary Figure 8.</b> $^1\text{H}$ NMR (400 MHz, $\text{CD}_3\text{COCD}_3$ , 298 K) (top), $^{19}\text{F}$ NMR (376 MHz, $\text{CD}_3\text{CN}$ , 298 K) (middle) and $^{13}\text{C}\{^1\text{H}\}$ NMR (101 MHz, $\text{CD}_3\text{CN}$ , 298 K) (bottom) spectra of <b>4</b> in $\text{CD}_3\text{CN}$ . | 17   |
| <b>Supplementary Figure 9.</b> $^1\text{H}$ NMR (400 MHz, $\text{CD}_3\text{CN}$ , 298 K) (top) and $^{13}\text{C}\{^1\text{H}\}$ NMR (101 MHz, $\text{CD}_3\text{CN}$ , 298 K) (bottom) spectra of <b>5</b> in $\text{CD}_3\text{CN}$ .                                                                             | 19   |
| <b>Supplementary Figure 10.</b> (a) Absorption, (b) emission and excitation spectra of <b>1</b> in $\text{CH}_3\text{CN}$ . <i>Insets</i> in (a) are the calculated EDDMs of selected singlet excited states of <b>1</b> (red indicates electron decrease and yellow indicates electron increase).                   | 20   |
| <b>Supplementary Figure 11.</b> (a) Absorption, (b) emission and excitation spectra of <b>2</b> in $\text{CH}_3\text{CN}$ . <i>Insets</i> in (a) are the calculated EDDMs of selected singlet excited states of <b>2</b> (red indicates electron decrease and yellow indicates electron increase).                   | 21   |

|                                                                                                                                                                                                                                                                                                                                                                                                                                                                                                                                                                                                                                                       |    |
|-------------------------------------------------------------------------------------------------------------------------------------------------------------------------------------------------------------------------------------------------------------------------------------------------------------------------------------------------------------------------------------------------------------------------------------------------------------------------------------------------------------------------------------------------------------------------------------------------------------------------------------------------------|----|
| <b>Supplementary Figure 12.</b> (a) Absorption, (b) emission and excitation spectra of <b>3</b> in CH <sub>3</sub> CN. <i>Insets</i> in (a) are the calculated EDDMs of selected singlet excited states of <b>3</b> (red indicates electron decrease and yellow indicates electron increase).                                                                                                                                                                                                                                                                                                                                                         | 22 |
| <b>Supplementary Figure 13.</b> (a) Absorption, (b) emission and excitation spectra of <b>4</b> in CH <sub>3</sub> CN. <i>Insets</i> in (a) are the calculated EDDMs of selected singlet excited states of <b>4</b> (red indicates electron decrease and yellow indicates electron increase).                                                                                                                                                                                                                                                                                                                                                         | 23 |
| <b>Supplementary Figure 14.</b> (a) Absorption, (b) emission and excitation spectra of <b>5</b> in CH <sub>3</sub> CN. <i>Insets</i> in (a) are the calculated EDDMs of selected singlet excited states of <b>5</b> (red indicates electron decrease and yellow indicates electron increase).                                                                                                                                                                                                                                                                                                                                                         | 24 |
| <b>Supplementary Figure 15.</b> Electrochemistry measurements of <b>1</b> in DMF:<br>(a) cyclic voltammetry, (b) square wave voltammetry, and (c) cyclic voltammetry with different scan rate ( $\nu$ ) ranging from 20 to 500 mV/s. Insert is the relationship between an oxidation peak (at 0.77 V vs Fc <sup>+0</sup> ) or a reduction peak (at -1.64 V vs Fc <sup>+0</sup> ) versus $\nu^{1/2}$ . Condition: three electrode system with Pt wire as the counter electrode, glassy carbon as the working electrode and SCE as the reference electrode, 0.1 M LiClO <sub>4</sub> in deaerated DMF. Scan rate of the cyclic voltammetry is 100 mV/s. | 25 |
| <b>Supplementary Figure 16.</b> Electrochemistry measurements of <b>2</b> in DMF:<br>(a) cyclic voltammetry, (b) square wave voltammetry, and (c) cyclic voltammetry with different scan rate ( $\nu$ ) ranging from 20 to 500 mV/s. Insert is the relationship between an oxidation peak (at 0.73 V vs Fc <sup>+0</sup> ) or a reduction peak (at -1.63 V vs Fc <sup>+0</sup> ) versus $\nu^{1/2}$ . Condition: three electrode system with Pt wire as the counter electrode, glassy carbon as the working electrode and SCE as the reference electrode, 0.1 M LiClO <sub>4</sub> in deaerated DMF. Scan rate of the cyclic voltammetry is 100 mV/s. | 26 |
| <b>Supplementary Figure 17.</b> Electrochemistry measurement of <b>3</b> in DMF:<br>(a) cyclic voltammetry, (b) square wave voltammetry, and (c) cyclic voltammetry with different scan rate ( $\nu$ ) ranging from 20 to 500 mV/s. Insert is the relationship between an oxidation peak (at 0.67 V vs Fc <sup>+0</sup> ) or a reduction peak (at -1.62 V vs Fc <sup>+0</sup> ) versus $\nu^{1/2}$ . Condition: three electrode system with Pt wire as the counter electrode, glassy carbon as the working electrode and SCE as the reference electrode, 0.1 M LiClO <sub>4</sub> in deaerated DMF. Scan rate of the cyclic voltammetry is 100 mV/s.  | 27 |
| <b>Supplementary Figure 18.</b> Electrochemistry measurement of <b>4</b> in DMF:<br>(a) cyclic voltammetry, (b) square wave voltammetry, and (c) cyclic voltammetry with different scan rate ( $\nu$ ) ranging from 20 to 500 mV/s. Insert is the relationship between an oxidation peak current (at 0.68 V vs Fc <sup>+0</sup> ) or a reduction peak (at -1.62 V vs Fc <sup>+0</sup> ) versus $\nu^{1/2}$ . Condition: three electrode system with Pt wire as the counter electrode, glassy carbon as the working electrode and SCE as the reference                                                                                                 | 28 |

electrode, 0.1 M LiClO<sub>4</sub> in deaerated DMF. Scan rate of the cyclic voltammetry is 100 mV/s.

|                                                                                                                                                                                                                                                                                                                                                                                                                                                                                                                                                                                                                                                       |    |
|-------------------------------------------------------------------------------------------------------------------------------------------------------------------------------------------------------------------------------------------------------------------------------------------------------------------------------------------------------------------------------------------------------------------------------------------------------------------------------------------------------------------------------------------------------------------------------------------------------------------------------------------------------|----|
| <b>Supplementary Figure 19.</b> Electrochemistry measurement of <b>5</b> in DMF: (a) cyclic voltammetry, (b) square wave voltammetry, and (c) cyclic voltammetry with different scan rate ( $v$ ) ranging from 20 to 500 mV/s. Insert is the relationship between an oxidation peak current (at 0.62 V vs Fc <sup>+0</sup> ) or a reduction peak (at -1.67 V vs Fc <sup>+0</sup> ) versus $v^{1/2}$ . Condition: three electrode system with Pt wire as the counter electrode, glassy carbon as the working electrode and SCE as the reference electrode, 0.1 M LiClO <sub>4</sub> in deaerated DMF. Scan rate of the cyclic voltammetry is 100 mV/s. | 29 |
| <b>Supplementary Table 1.</b> Calculated MOs of <b>1</b> (Isovalue = 0.04).                                                                                                                                                                                                                                                                                                                                                                                                                                                                                                                                                                           | 30 |
| <b>Supplementary Table 2.</b> Calculated MOs of <b>2</b> (Isovalue = 0.04).                                                                                                                                                                                                                                                                                                                                                                                                                                                                                                                                                                           | 32 |
| <b>Supplementary Table 3.</b> Calculated MOs of <b>3</b> (Isovalue = 0.04).                                                                                                                                                                                                                                                                                                                                                                                                                                                                                                                                                                           | 34 |
| <b>Supplementary Table 4.</b> Calculated MOs of <b>4</b> (Isovalue = 0.04).                                                                                                                                                                                                                                                                                                                                                                                                                                                                                                                                                                           | 36 |
| <b>Supplementary Table 5.</b> Calculated MOs of <b>5</b> (Isovalue = 0.04).                                                                                                                                                                                                                                                                                                                                                                                                                                                                                                                                                                           | 38 |
| <b>Supplementary Table 6.</b> Calculated singlet electronic transitions ( $f > 0.01$ ) of <b>1</b> in CH <sub>3</sub> CN (Isovalue = 0.04).                                                                                                                                                                                                                                                                                                                                                                                                                                                                                                           | 40 |
| <b>Supplementary Table 7.</b> Calculated singlet electronic transitions ( $f > 0.01$ ) of <b>2</b> in CH <sub>3</sub> CN (Isovalue = 0.04).                                                                                                                                                                                                                                                                                                                                                                                                                                                                                                           | 44 |
| <b>Supplementary Table 8.</b> Calculated singlet electronic transitions ( $f > 0.01$ ) of <b>3</b> in CH <sub>3</sub> CN (Isovalue = 0.04).                                                                                                                                                                                                                                                                                                                                                                                                                                                                                                           | 49 |
| <b>Supplementary Table 9.</b> Calculated singlet electronic transitions ( $f > 0.01$ ) of <b>4</b> in CH <sub>3</sub> CN (Isovalue = 0.04).                                                                                                                                                                                                                                                                                                                                                                                                                                                                                                           | 54 |
| <b>Supplementary Table 10.</b> Calculated singlet electronic transitions ( $f > 0.01$ ) of <b>5</b> in CH <sub>3</sub> CN (Isovalue = 0.04).                                                                                                                                                                                                                                                                                                                                                                                                                                                                                                          | 59 |
| Cartesian coordinates of optimized <b>1</b>                                                                                                                                                                                                                                                                                                                                                                                                                                                                                                                                                                                                           | 64 |
| Cartesian coordinates of optimized <b>2</b>                                                                                                                                                                                                                                                                                                                                                                                                                                                                                                                                                                                                           | 67 |
| Cartesian coordinates of optimized <b>3</b>                                                                                                                                                                                                                                                                                                                                                                                                                                                                                                                                                                                                           | 70 |
| Cartesian coordinates of optimized <b>4</b>                                                                                                                                                                                                                                                                                                                                                                                                                                                                                                                                                                                                           | 74 |
| Cartesian coordinates of optimized <b>5</b>                                                                                                                                                                                                                                                                                                                                                                                                                                                                                                                                                                                                           | 78 |



|                                                                                                                                                                                                                                                                                                                                                                                                           |    |
|-----------------------------------------------------------------------------------------------------------------------------------------------------------------------------------------------------------------------------------------------------------------------------------------------------------------------------------------------------------------------------------------------------------|----|
| <b>Supplementary Figure 20.</b> Transient absorption spectra of <b>2</b> under irradiation of (a) 480 nm and (b) 800 nm.                                                                                                                                                                                                                                                                                  | 82 |
| <b>Supplementary Figure 21.</b> Transient absorption spectra of <b>3</b> under irradiation of (a) 480 nm and (b) 800 nm.                                                                                                                                                                                                                                                                                  | 83 |
| <b>Supplementary Figure 22.</b> Transient absorption spectra of <b>4</b> under irradiation of (a) 480 nm and (b) 800 nm.                                                                                                                                                                                                                                                                                  | 84 |
| <b>Supplementary Figure 23.</b> Emission decay of <b>3</b> in deaerated (top) and aerated (bottom) CH <sub>3</sub> CN. Insets show the intensity plotted on a log scale (excited at 480 nm and decay trace taken at 670 nm).                                                                                                                                                                              | 85 |
| <b>Supplementary Figure 24.</b> Emission decay of <b>4</b> in deaerated (top) and aerated (bottom) CH <sub>3</sub> CN. Insets show the intensity plotted on a log scale (excited at 480 nm and decay trace taken at 670 nm).                                                                                                                                                                              | 86 |
| <b>Supplementary Figure 25.</b> Emission decay of <b>5</b> in deaerated (top) and aerated (bottom) CH <sub>3</sub> CN. Insets show the intensity plotted on a log scale (excited at 480 nm and decay trace taken at 670 nm).                                                                                                                                                                              | 87 |
| <b>Supplementary Figure 26.</b> <sup>1</sup> H NMR (400 MHz, CDCl <sub>3</sub> , 298 K) spectra of benzyl amine C-N coupling using <b>1</b> as the photosensitizer with different irradiation time: (a) 30 min; (b) 1 h; (c) 2 h; (d) 4 h. Condition: 50 mM benzyl amine, 1 mol% <b>1</b> , 5 mL CH <sub>3</sub> CN, O <sub>2</sub> , 740 nm LEDs, room temperature.                                      | 88 |
| <b>Supplementary Figure 27.</b> <sup>1</sup> H NMR (400 MHz, CDCl <sub>3</sub> , 298 K) spectra of benzyl amine C-N coupling using <b>2</b> as the photosensitizer with different irradiation time: (a) 20 min; (b) 30 min; (c) 40 min; (d) 60 min; (e) 80 min; (f) 100 min. Condition: 50 mM of benzyl amine, 1 mol% <b>2</b> , 5 mL CH <sub>3</sub> CN, O <sub>2</sub> , 740 nm LEDs, room temperature. | 89 |
| <b>Supplementary Figure 28.</b> <sup>1</sup> H NMR (400 MHz, CDCl <sub>3</sub> , 298 K) spectra of benzyl amine C-N coupling using <b>3</b> as the photosensitizer with different irradiation time: (a) 10 min; (b) 20 min; (c) 30 min; (d) 40 min; (e) 50 min. Condition: 50 mM benzyl amine, 1 mol% <b>3</b> , 5 mL CH <sub>3</sub> CN, O <sub>2</sub> , 740 nm LEDs, room temperature.                 | 91 |
| <b>Supplementary Figure 29.</b> <sup>1</sup> H NMR (400 MHz, CDCl <sub>3</sub> , 298 K) spectra of benzyl amine C-N coupling using <b>4</b> as the photosensitizer with different irradiation time: (a) 10 min; (b) 20 min; (c) 40 min; (d) 80 min; (e) 120 min; (f) 160 min. Condition: 50 mM benzyl amine, 1 mol% <b>4</b> , 5 mL CH <sub>3</sub> CN, O <sub>2</sub> , 740 nm LEDs, room temperature.   | 92 |

- Supplementary Figure 30.**  $^1\text{H}$  NMR (400 MHz,  $\text{CDCl}_3$ , 298 K) spectra of benzyl amine C-N coupling using **5** as the photosensitizer with different irradiation time: (a) 3 min; (b) 10 min; (c) 15 min; (d) 20 min; (e) 30 min. Condition: 50 mM benzyl amine, 1 mol% **5**, 5 mL  $\text{CH}_3\text{CN}$ ,  $\text{O}_2$ , 740 nm LEDs, room temperature. 94
- Supplementary Figure 31.**  $^1\text{H}$  NMR (400 MHz,  $\text{CDCl}_3$ , 298 K) spectra of benzyl amine C-N coupling. (a) Standard benzyl amine; (b) Standard condition: 50 mM benzyl amine, 1 mol%, 5 mL  $\text{CH}_3\text{CN}$ ,  $\text{O}_2$ , 740 nm LEDs, room temperature, 30 min; (c) time is 50 min; (d) no photosensitizer; (e) no irradiation; (f) Ar atmosphere; (g) Air atmosphere; (h) photosensitizer is  $[\text{Ru}(\text{bpy})_3](\text{PF}_6)_2$ ; (i) photosensitizer is **1**; (j) photosensitizer is complex **1** and time is 4 h; (k) photosensitizer is **2**; (l) photosensitizer is **2** and time is 100 min; (m) photosensitizer is **4**; (n) photosensitizer **4** and time is 160 min; (o) photosensitizer is **5**. 95
- Supplementary Figure 32.** (a) Yield change over time upon irradiation at 730 nm of different power. (b) The obtained yields after 20 min irradiation at 730 nm of different power. Conditions: 50 mM benzyl amine, 1 mol% **5**, 2 mL  $\text{CH}_3\text{CN}$ ,  $\text{O}_2$ , irradiation using 730 nm LED (M730L5) of controlled power at room temperature with a 695 nm long-pass filter. 98
- Supplementary Figure 33.** (a) Experimental set-up. (b) Yields of the photocatalytic C-N coupling of benzyl amine in different reaction tubes. Photocatalysis condition of each tube: 50 mM benzyl amine, 1 mol% **5**, 4 mL  $\text{CH}_3\text{CN}$ , open to air, irradiation at 456 or 740 nm for 6 h at room temperature. 99
- Supplementary Figure 34.**  $^1\text{H}$  NMR (400 MHz,  $\text{CDCl}_3$ , 298 K) spectra of the photocatalytic C-N coupling of benzyl amine in different reaction tubes. Photocatalysis condition of each tube: 50 mM benzyl amine, 1 mol% **5**, 4 mL  $\text{CH}_3\text{CN}$ , open to air, irradiation at 456 nm for 6 h at room temperature. 100
- Supplementary Figure 35.**  $^1\text{H}$  NMR (400 MHz,  $\text{CDCl}_3$ , 298 K) spectra of the photocatalytic C-N coupling of benzyl amine in different reaction tubes. Photocatalysis condition of each tube: 50 mM benzyl amine, 1 mol% **5**, 4 mL  $\text{CH}_3\text{CN}$ , open to air, irradiation at 740 nm for 6 h at room temperature. 101
- Supplementary Figure 36.**  $^1\text{H}$  NMR (400 MHz,  $\text{CDCl}_3$ , 298 K) spectra of thioanisole sulfoxidation using **5** as the photosensitizer with different irradiation time: (a) standard thioanisole; (b) 20 min; (c) 40 min; (d) 1 h; (e) 2 h; (f) 3 h. Condition: 50 mM benzyl amine, 1 mol% **5**, 4 mL  $\text{CH}_3\text{CN}$ , 1 mL  $\text{CH}_3\text{OH}$ ,  $\text{O}_2$ , 740 nm LEDs, room temperature. 102
- Supplementary Figure 37.** Yield change over time of thioanisole sulfoxidation. Condition: 50 mM thioanisole, 1 mol% **5**, 4 mL  $\text{CH}_3\text{CN}$ , 1 mL  $\text{CH}_3\text{OH}$ ,  $\text{O}_2$ , 740 nm LEDs, room temperature. 103

|                                                                                                                                                                                                                                                                                                                                                                                                                              |     |
|------------------------------------------------------------------------------------------------------------------------------------------------------------------------------------------------------------------------------------------------------------------------------------------------------------------------------------------------------------------------------------------------------------------------------|-----|
| <b>Supplementary Figure 38.</b> <sup>1</sup> H NMR (400 MHz, CDCl <sub>3</sub> , 298 K) spectra of anthracene [4+2] Diels-Alder reaction using <b>5</b> as the photosensitizer with different irradiation time: (a) standard anthracene; (b) 20 min; (c) 40 min; (d) 1 h; (e) 2 h; (f) 4 h; (g) 6 h. Condition: 10 mM anthracene, 1 mol% <b>5</b> , 5 mL CH <sub>3</sub> CN, O <sub>2</sub> , 740 nm LEDs, room temperature. | 104 |
| <b>Supplementary Figure 39.</b> Yield change over time of anthracene [4+2] Diels-Alder reaction. Condition: 10 mM anthracene, 1 mol% <b>5</b> , 4 mL CH <sub>3</sub> CN, O <sub>2</sub> , 740 nm LEDs, room temperature.                                                                                                                                                                                                     | 105 |
| <b>Supplementary Figure 40.</b> <sup>1</sup> H NMR (400 MHz, CDCl <sub>3</sub> , 298 K) spectra of cyclooctene oxidation using <b>5</b> as the photosensitizer with different irradiation time: (a) standard cyclooctene; (b) 1 h; (c) 3 h; (d) 5 h; (e) 7 h; (f) 10 h. Condition: 50 mM cyclooctene, 1 mol% <b>5</b> , 5 mL CD <sub>3</sub> CN, O <sub>2</sub> , 740 nm LEDs, room temperature.                             | 106 |
| <b>Supplementary Figure 41.</b> Yield change over time of anthracene oxidation. Condition: 10 mM anthracene, 1 mol% <b>5</b> , 5 mL CH <sub>3</sub> CN, O <sub>2</sub> , 740 nm LEDs, room temperature.                                                                                                                                                                                                                      | 107 |
| <b>Supplementary Figure 42.</b> <sup>1</sup> H NMR (400 MHz, CDCl <sub>3</sub> , 298 K) spectra of HMF oxidation using <b>5</b> as the photosensitizer with different irradiation time: (a) standard HMF; (b) 30 min; (c) 1 h; (d) 2 h; (e) 3 h; (f) 4 h; (g) 5 h. Condition: 50 mM HMF, 1 mol% <b>5</b> , 5 mL CH <sub>3</sub> CN, O <sub>2</sub> , 740 nm LEDs, room temperature.                                          | 108 |
| <b>Supplementary Figure 43.</b> <sup>1</sup> H NMR (400 MHz, CDCl <sub>3</sub> , 298 K) spectra before (a) and after (b) dehalogenation of phenacyl bromide using <b>5</b> as the photosensitizer. Condition: 50 mM phenacyl bromide, 10 equiv. TEOA, 0.2 mol% <b>5</b> , 5 mL CH <sub>3</sub> CN, Ar, 740 nm LEDs, room temperature, 8 h, purified via column chromatography (hexane/ethyl acetate = 100/3).                | 110 |
| <b>Supplementary Figure 44.</b> <sup>1</sup> H NMR (400 MHz, CDCl <sub>3</sub> , 298 K) spectra before (a) and after (b) cyanation of tetrahydroisoquinoline using <b>5</b> as the photosensitizer. Condition: 50 mM tetrahydroisoquinoline, 1 mol% <b>5</b> , 5 mL CH <sub>3</sub> CN, Ar, 740 nm LEDs, room temperature, 24 h, purified via column chromatography (hexane/ethyl acetate = 100/3).                          | 111 |
| <b>Supplementary Figure 45.</b> Proposed photocatalytic cycle of cyanation using <b>5</b> as the photosensitizer under 740 nm irradiation. [Ru] <sup>2+</sup> represents <b>5</b> .                                                                                                                                                                                                                                          | 112 |
| <b>Supplementary Figure 46.</b> <sup>1</sup> H NMR (400 MHz, CDCl <sub>3</sub> , 298 K) (a) and <sup>13</sup> C{ <sup>1</sup> H} NMR (101 MHz, CDCl <sub>3</sub> , 298 K) (b) spectra after C-Ccoupling                                                                                                                                                                                                                      | 113 |

between benzaldehyde and allyl acetate using **5** as the photosensitizer and Ni(OTf)<sub>2</sub> as a cocatalyst. Condition: 50 mM benzaldehyde, 10 equiv. allyl acetate, 5 mol% **5**, 15 mol% Ni(OTf)<sub>2</sub>, 20 mol% *o*-phenanthroline, 10 equiv. DIPEA, 2 mL CH<sub>3</sub>CN, Ar, 740 nm LEDs, room temperature, 72 h, purified via column chromatography (hexane/ethyl acetate = 10/1).

**Supplementary Figure 47.** <sup>1</sup>H NMR (400 MHz, CDCl<sub>3</sub>, 298 K) (a) and <sup>13</sup>C{<sup>1</sup>H} NMR (101 MHz, CDCl<sub>3</sub>, 298 K) (b) spectra after C-C coupling between 4-methoxybenzaldehyde and allyl acetate using **5** as the photosensitizer and Ni(OTf)<sub>2</sub> as a cocatalyst. Condition: 50 mM 4-methoxybenzaldehyde, 10 equiv. allyl acetate, 5 mol% **5**, 15 mol% Ni(OTf)<sub>2</sub>, 20 mol% *o*-phenanthroline, 10 equiv. DIPEA, 2 mL CH<sub>3</sub>CN, Ar, 740 nm LEDs, room temperature, 72 h, purified via column chromatography (hexane/ethyl acetate = 10/1). 114

**Supplementary Figure 48.** <sup>1</sup>H NMR (400 MHz, CDCl<sub>3</sub>, 298 K) (a) and <sup>13</sup>C{<sup>1</sup>H} NMR (101 MHz, CDCl<sub>3</sub>, 298 K) (b) spectra after C-C coupling between 4-(trifluoromethyl)benzaldehyde and allyl acetate using **5** as the photosensitizer and Ni(OTf)<sub>2</sub> as a cocatalyst. Condition: 50 mM 4-(trifluoromethyl)benzaldehyde, 10 equiv. allyl acetate, 5 mol% **5**, 15 mol% Ni(OTf)<sub>2</sub>, 20 mol% *o*-phenanthroline, 10 equiv. DIPEA, 2 mL CH<sub>3</sub>CN, Ar, 740 LEDs nm, room temperature, 72 h, purified via column chromatography (hexane/ethyl acetate = 10/1). 115

**Supplementary Figure 49.** Proposed photocatalytic cycle of the allylation of aromatic aldehydes using **5** and Ni-cocatalyst under 740 nm irradiation. [**Ru**]<sup>2+</sup> represents **5**. 116

## SUPPLEMENTARY FIGURES

Ligand *bpyvp-R*:

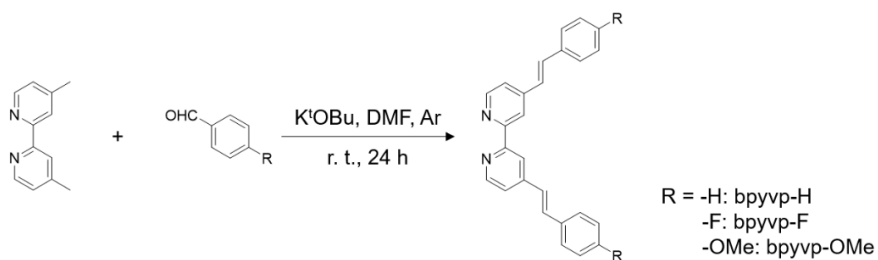

$[\text{Ru}(\text{bpy})_2(\text{bpyvp-H})]^{2+}$  (**1**):

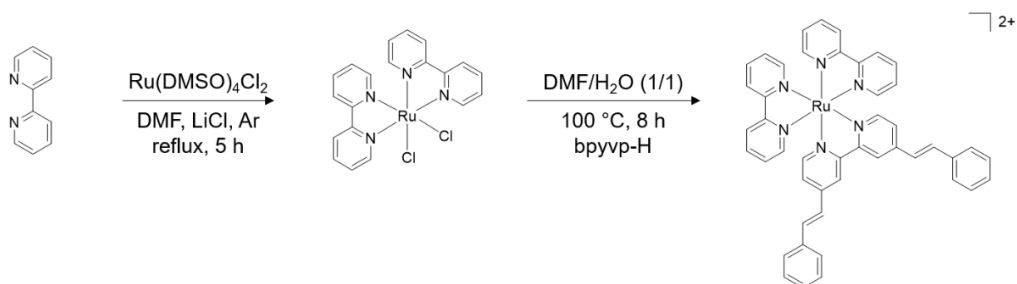

$[\text{Ru}(\text{bpy})(\text{bpyvp-H})_2]^{2+}$  (**2**):

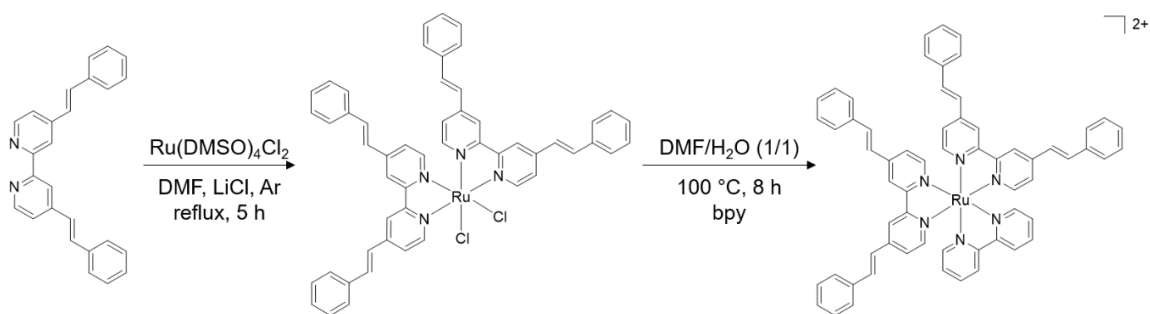

$[\text{Ru}((\text{bpyvp-R})_3)]^{2+}$  (**3**, **4**, and **5**):

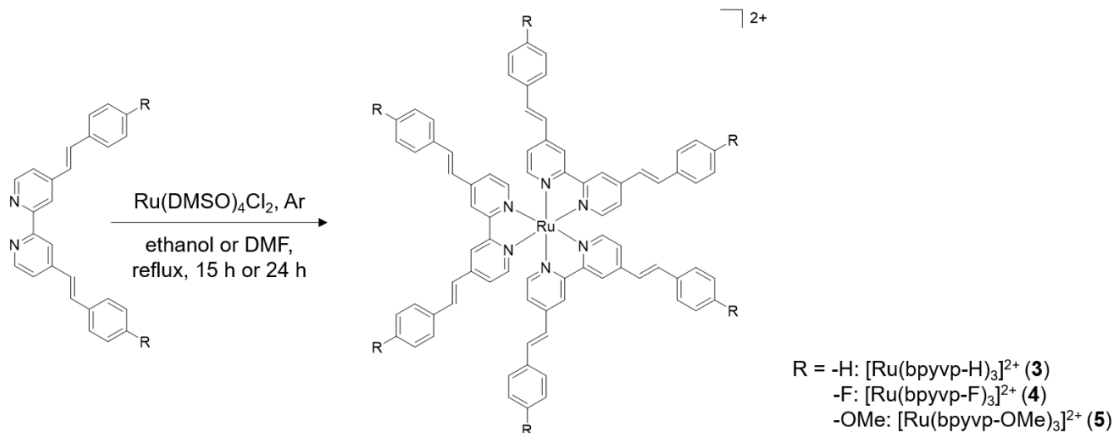

**Supplementary Figure 1.** Synthetic paths for ligands and complexes **1-5**.

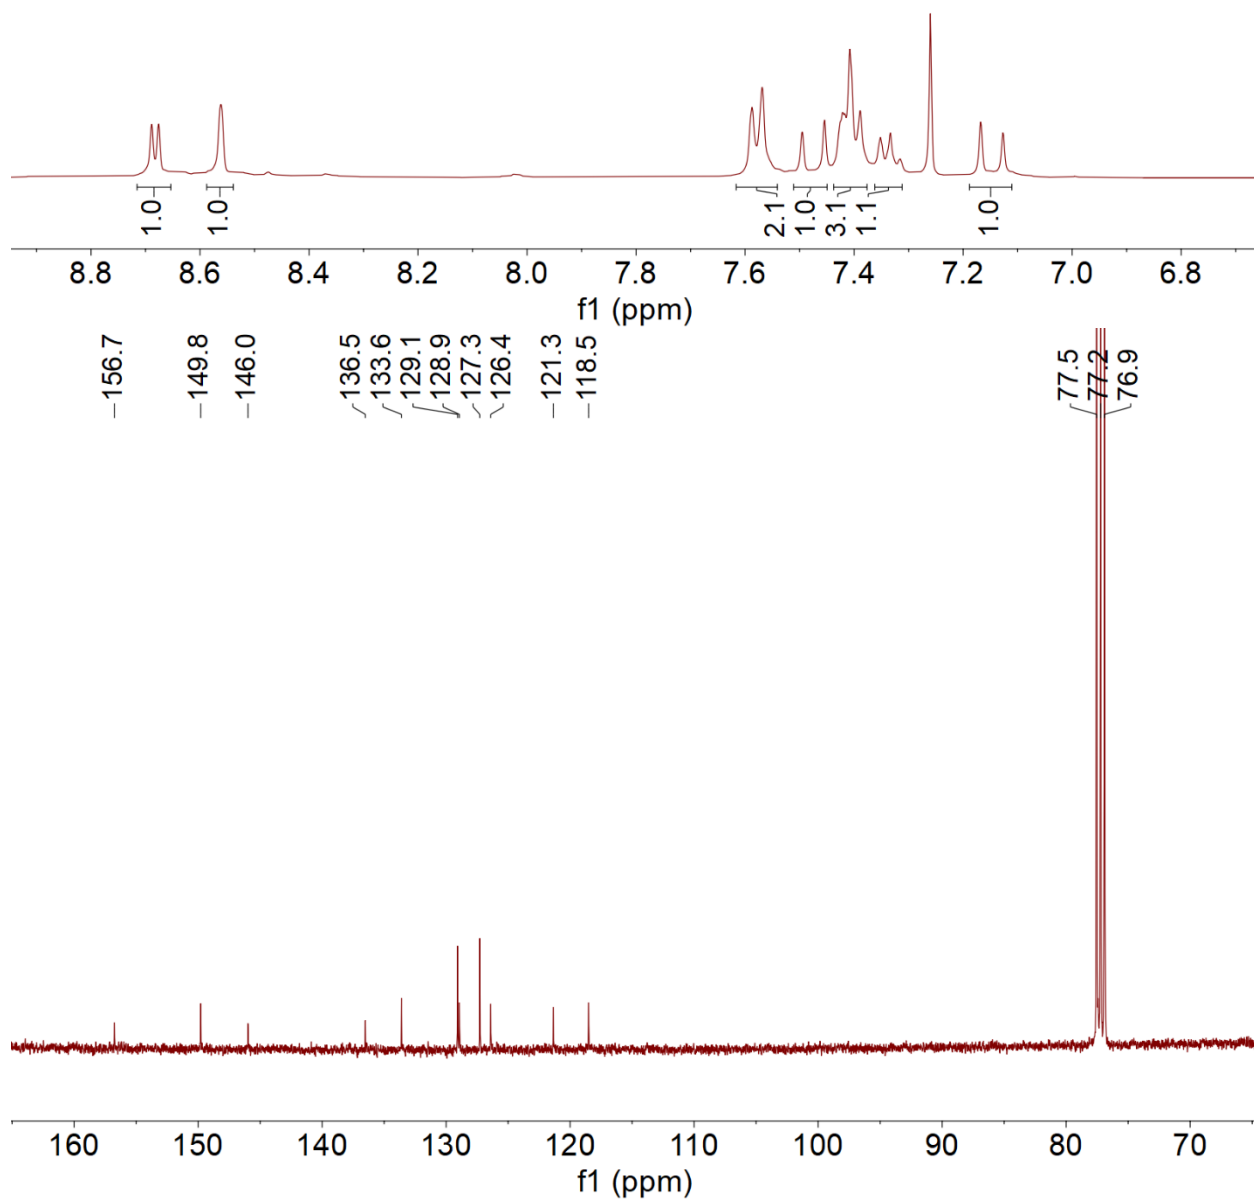

**Supplementary Figure 2.**  $^1\text{H}$  NMR (400 MHz,  $\text{CDCl}_3$ , 298 K) (top) and  $^{13}\text{C}\{^1\text{H}\}$  NMR (101 MHz,  $\text{CDCl}_3$ , 298 K) (bottom) spectra of bpyvp-H.

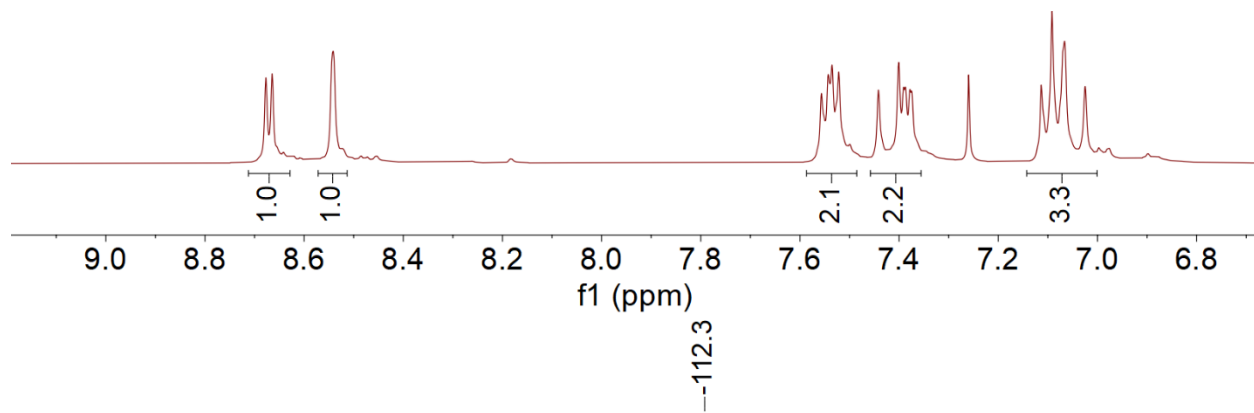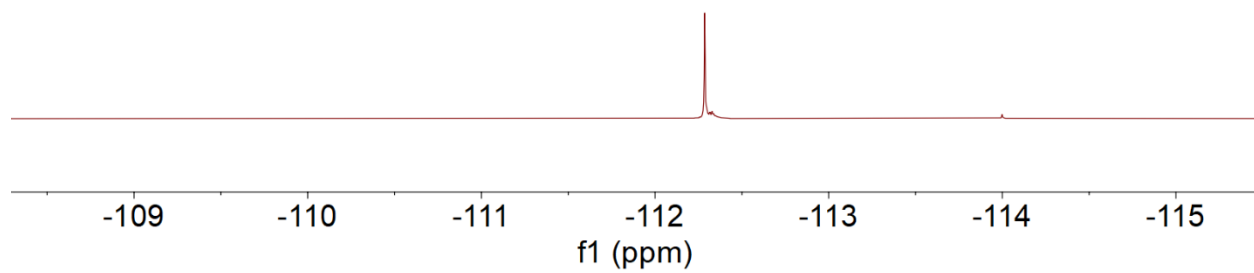

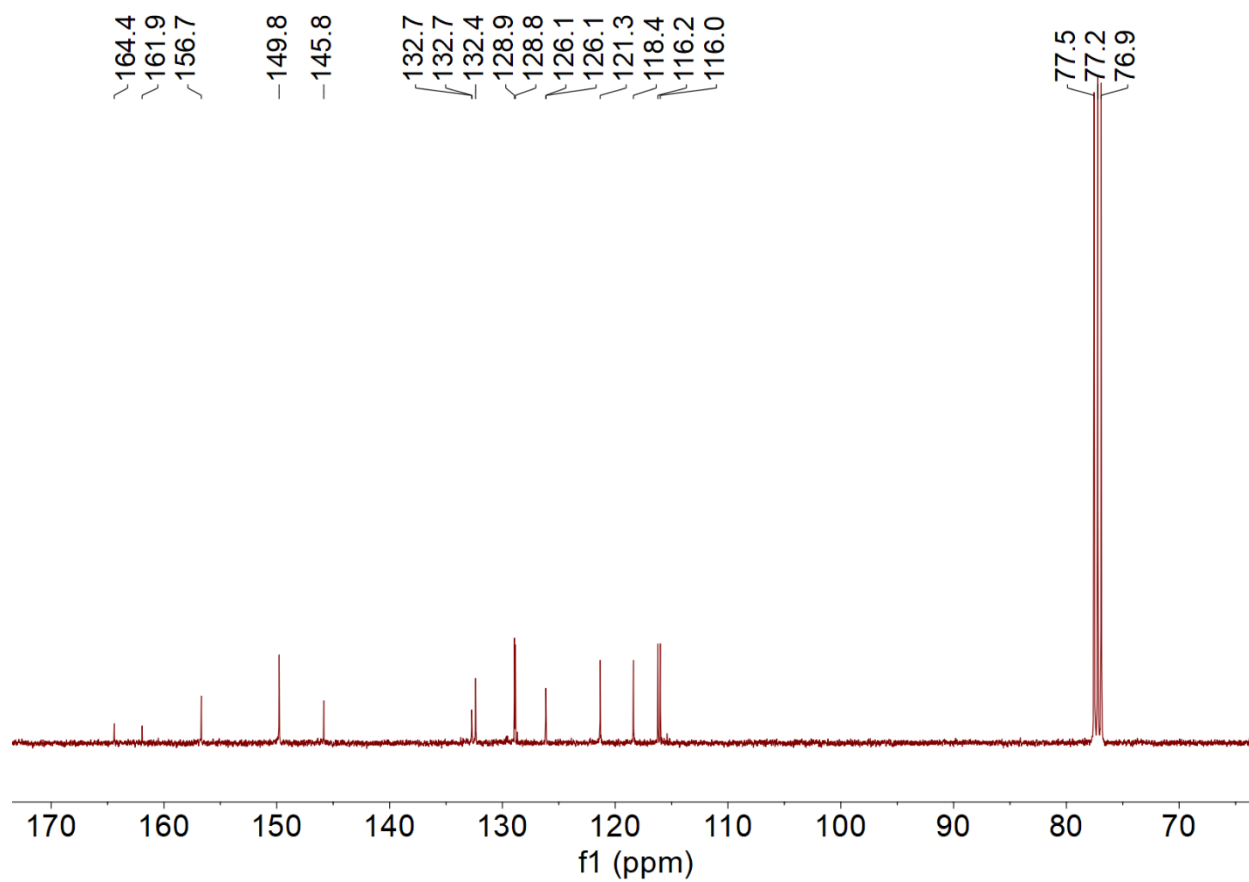

**Supplementary Figure 3.**  $^1\text{H}$  NMR (400 MHz,  $\text{CDCl}_3$ , 298 K) (top),  $^{19}\text{F}$  NMR (376 MHz,  $\text{CDCl}_3$ , 298 K) (middle), and  $^{13}\text{C}\{^1\text{H}\}$  NMR (101 MHz,  $\text{CDCl}_3$ , 298 K) (bottom) spectra of bpyvp-F.



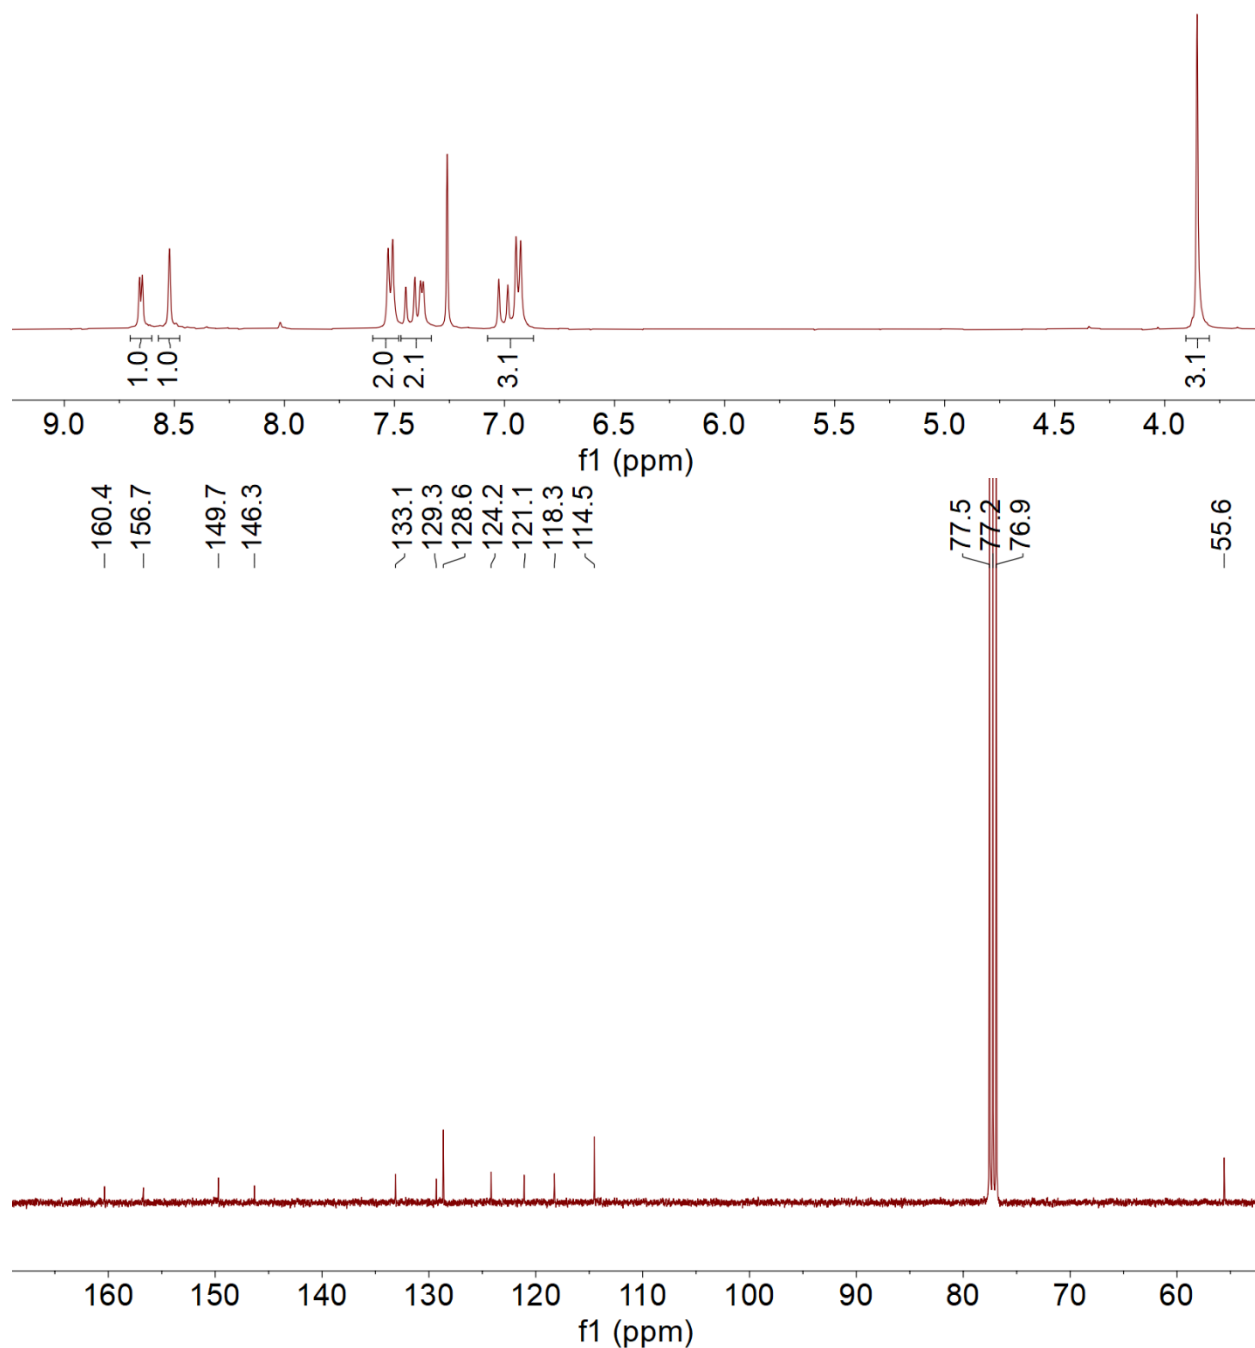

**Supplementary Figure 4.**  $^1\text{H}$  NMR (400 MHz,  $\text{CDCl}_3$ , 298 K) (top) and  $^{13}\text{C}\{^1\text{H}\}$  NMR (101 MHz,  $\text{CDCl}_3$ , 298 K) (bottom) spectra of bpyvp-OMe.

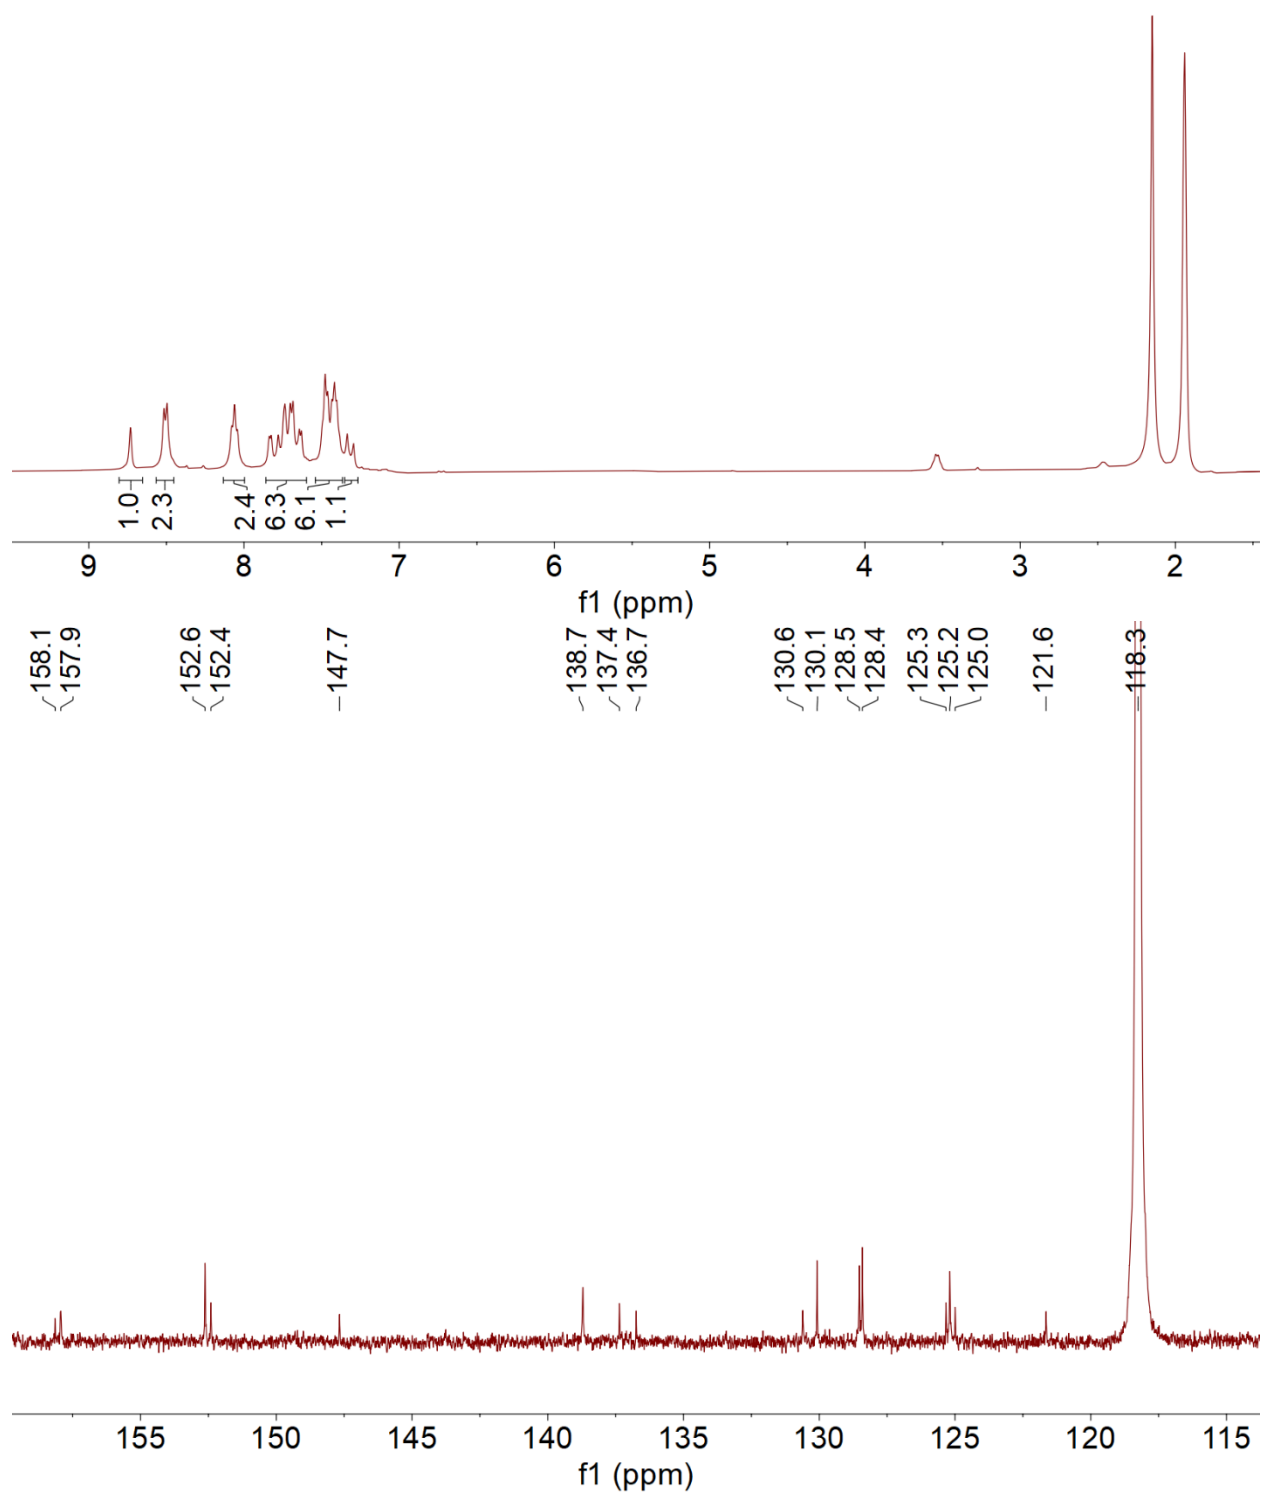

**Supplementary Figure 5.**  $^1\text{H}$  NMR (400 MHz,  $\text{CD}_3\text{CN}$ , 298 K) (top) and  $^{13}\text{C}\{^1\text{H}\}$  NMR (101 MHz,  $\text{CD}_3\text{CN}$ , 298 K) (bottom) spectra of **1**.

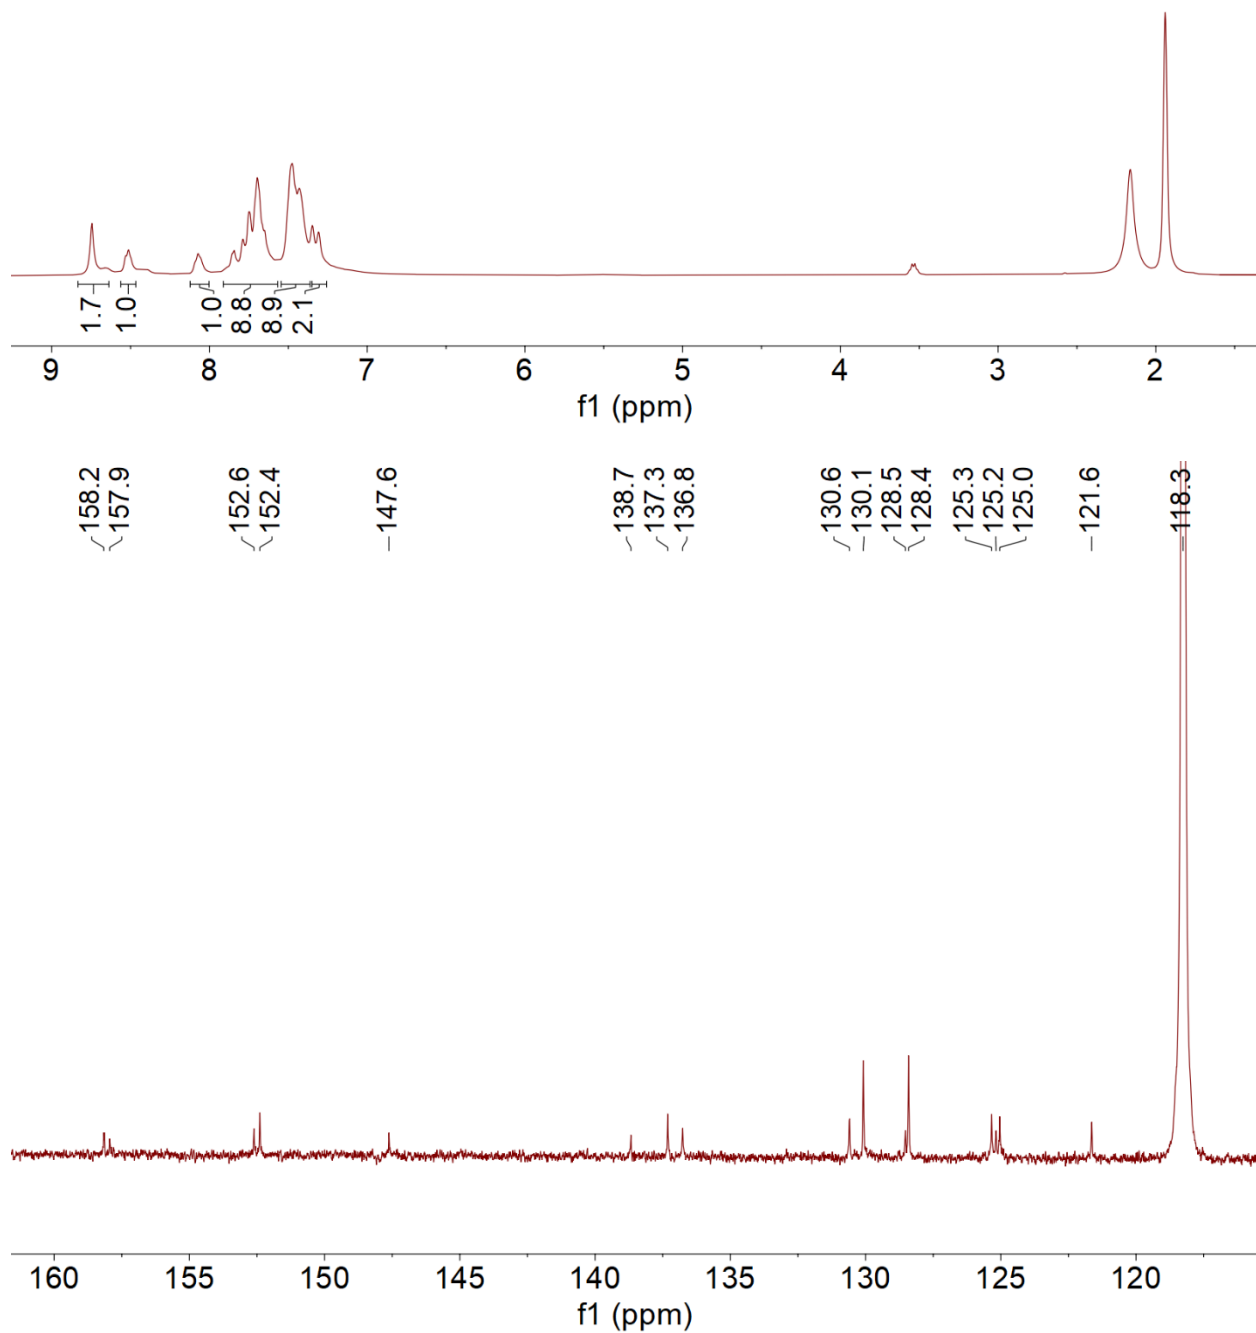

**Supplementary Figure 6.**  $^1\text{H}$  NMR (400 MHz,  $\text{CD}_3\text{CN}$ , 298 K) (top) and  $^{13}\text{C}\{^1\text{H}\}$  NMR (101 MHz,  $\text{CD}_3\text{CN}$ , 298 K) (bottom) spectra of **2**.

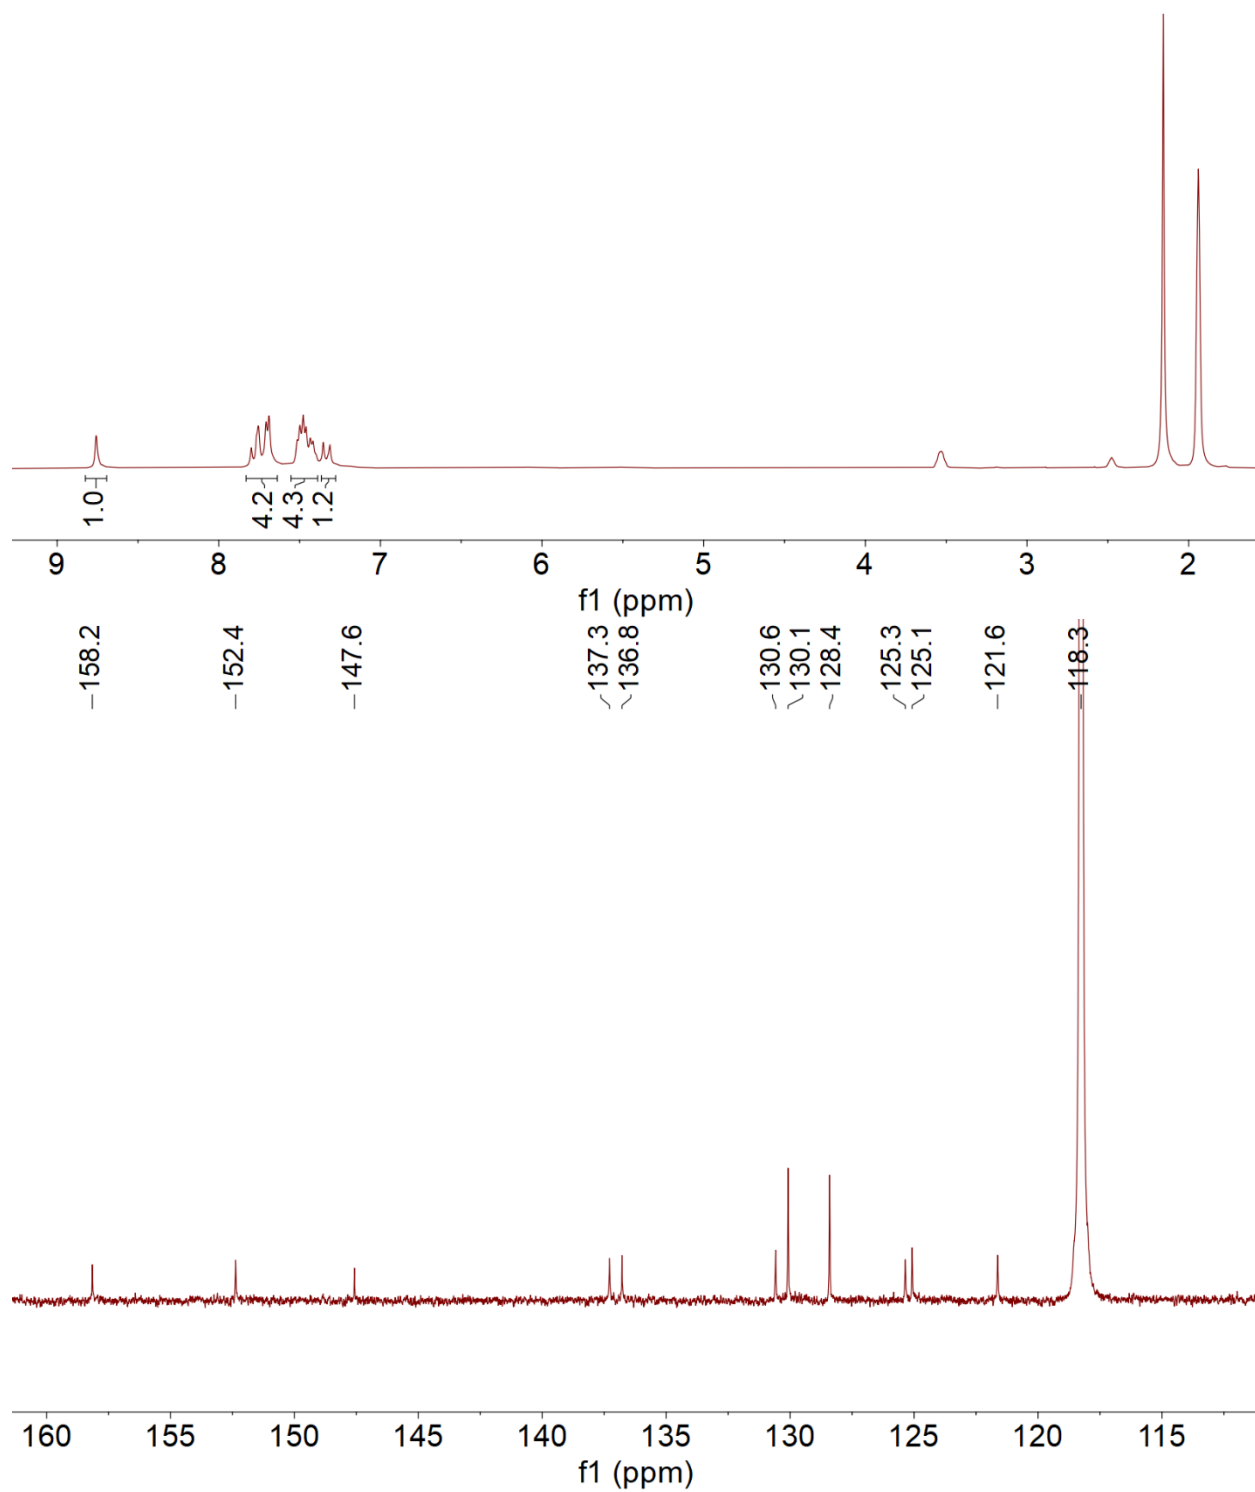

**Supplementary Figure 7.**  $^1\text{H}$  NMR (400 MHz,  $\text{CD}_3\text{CN}$ , 298 K) (top) and  $^{13}\text{C}\{^1\text{H}\}$  NMR (101 MHz,  $\text{CD}_3\text{CN}$ , 298 K) (bottom) spectra of **3**.

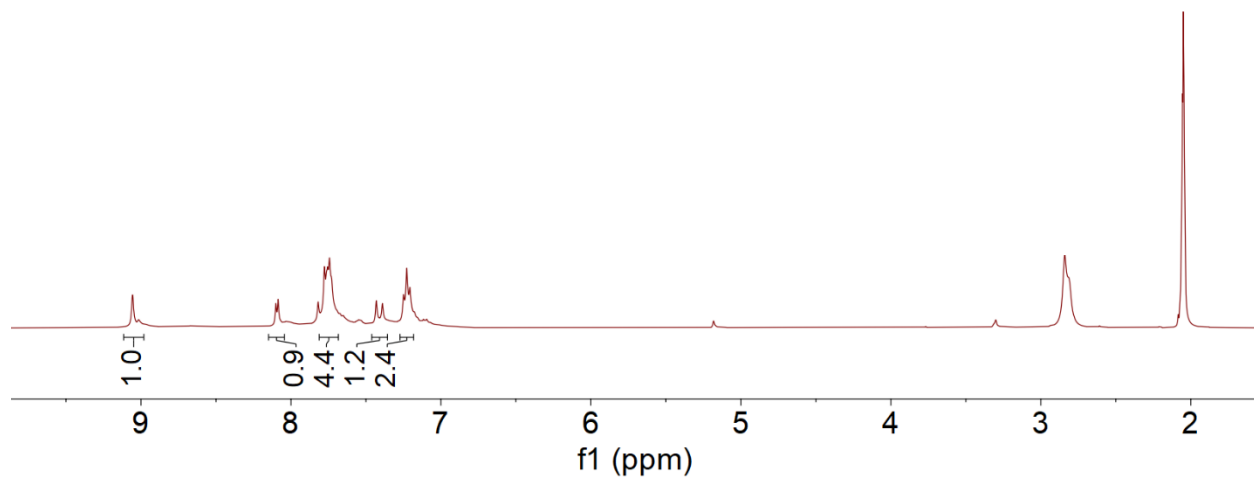

--71.7  
--73.5

--112.8

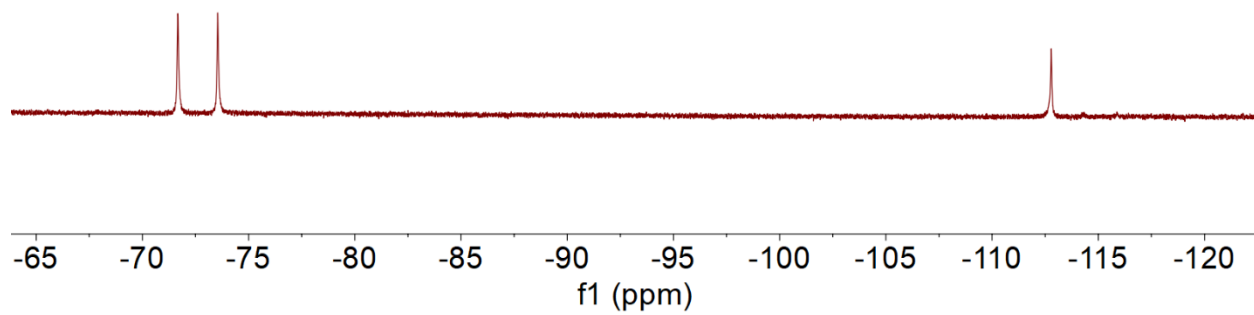

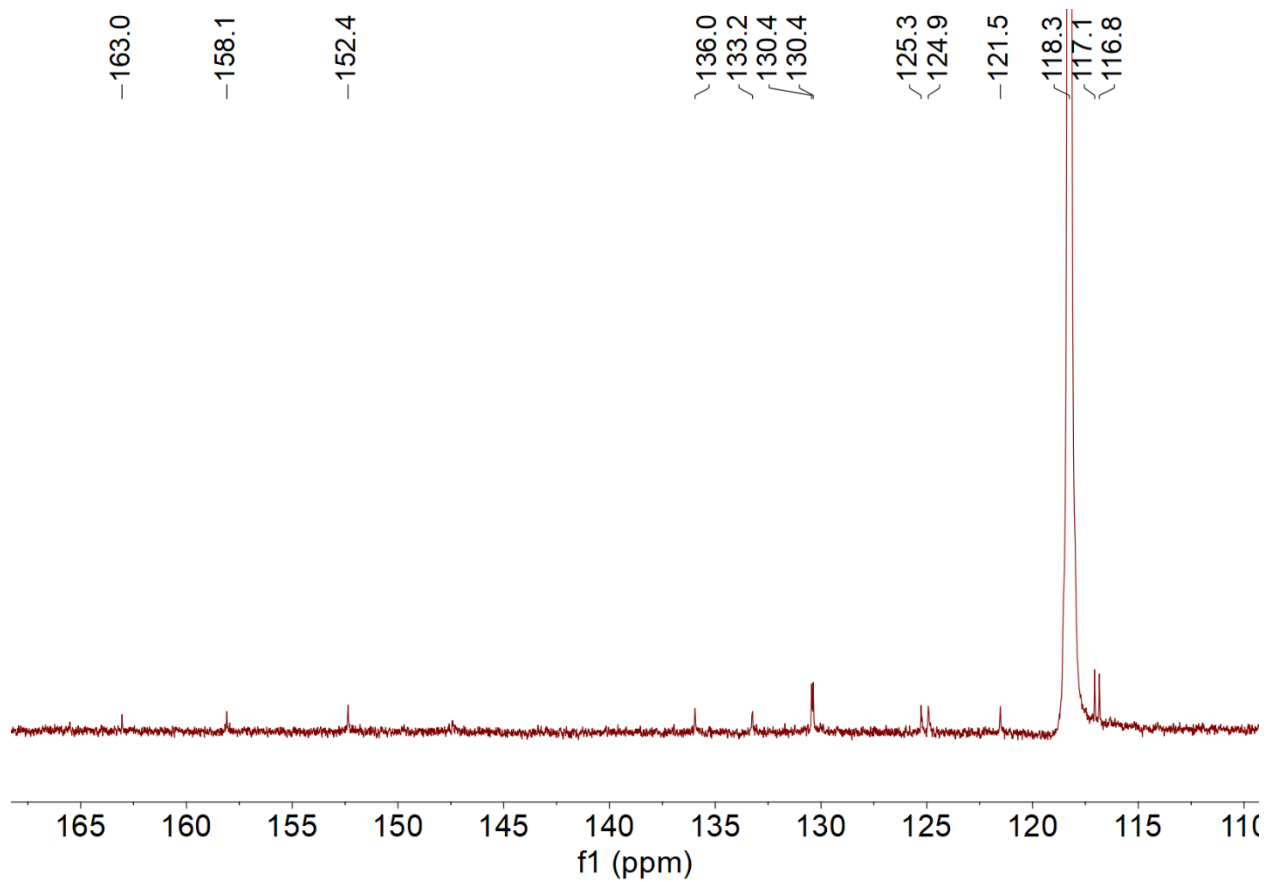

**Supplementary Figure 8.**  $^1\text{H}$  NMR (400 MHz,  $\text{CD}_3\text{COCD}_3$ , 298 K) (top),  $^{19}\text{F}$  NMR (376 MHz,  $\text{CD}_3\text{CN}$ , 298 K) (middle) and  $^{13}\text{C}\{^1\text{H}\}$  NMR (101 MHz,  $\text{CD}_3\text{CN}$ , 298 K) (bottom) spectra of **4**.

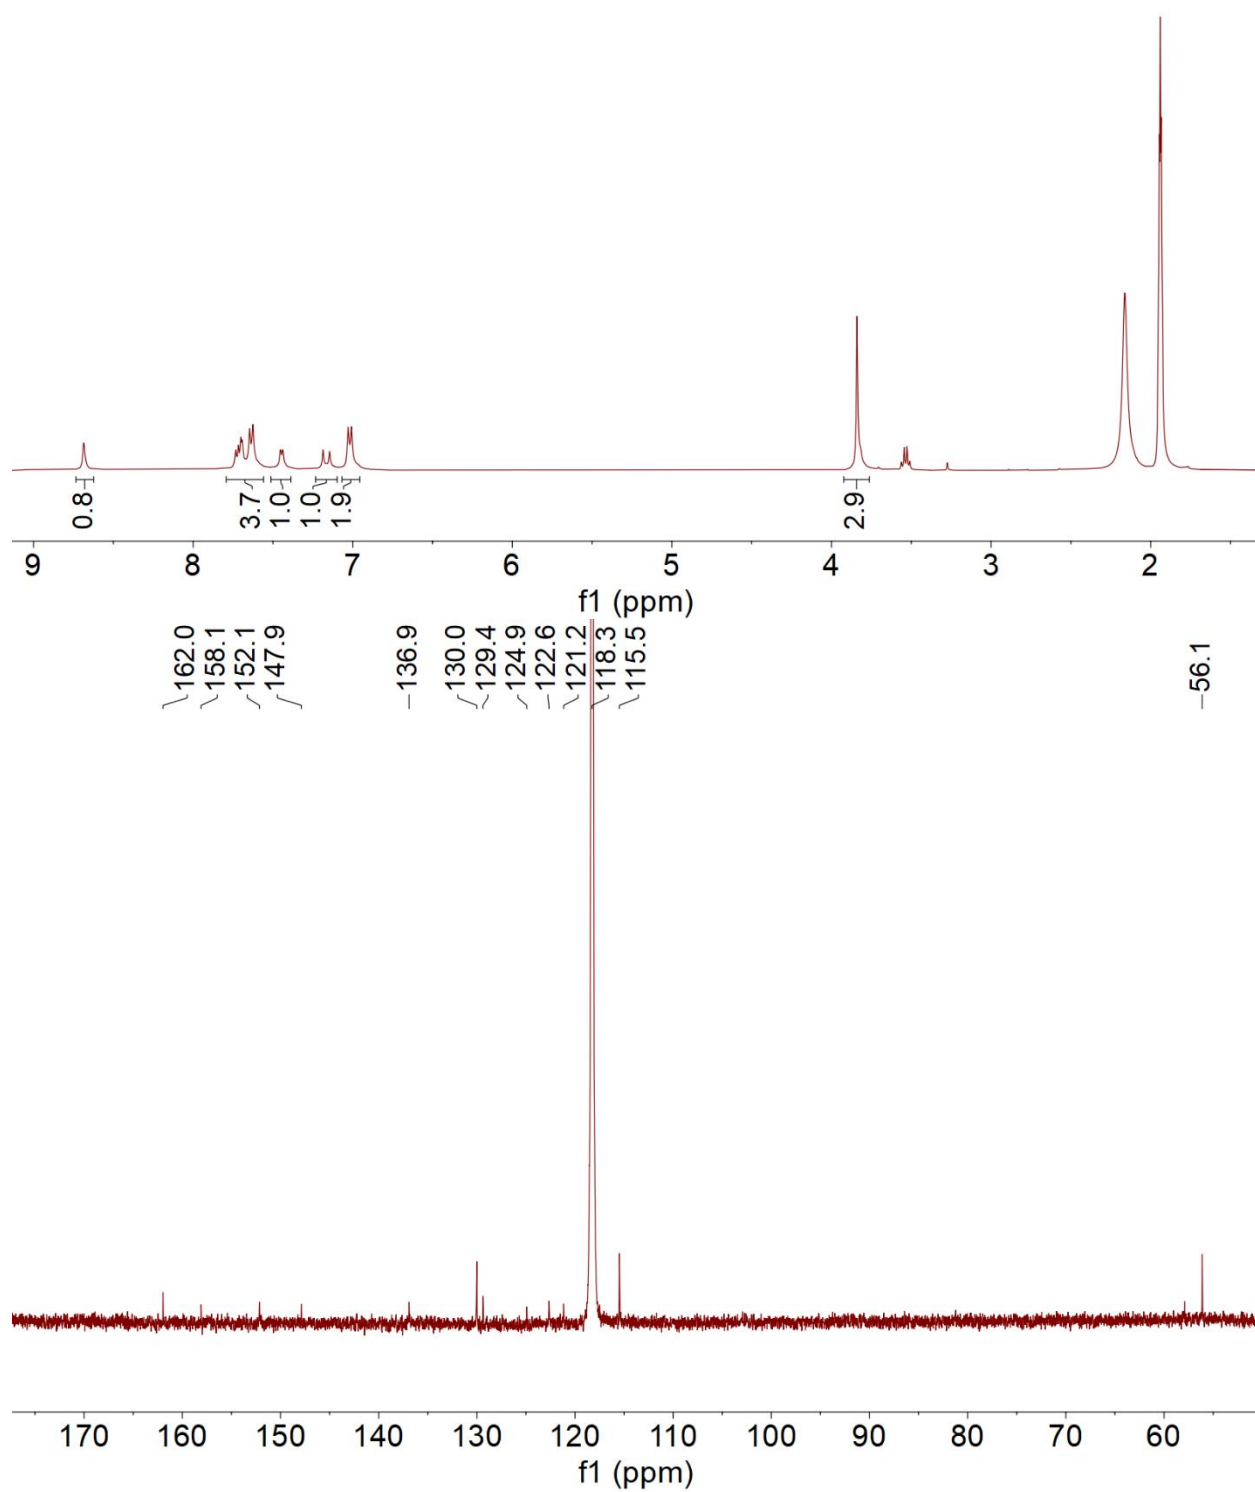

**Supplementary Figure 9.**  $^1\text{H}$  NMR (400 MHz,  $\text{CD}_3\text{CN}$ , 298 K) (top) and  $^{13}\text{C}\{^1\text{H}\}$  NMR (101 MHz,  $\text{CD}_3\text{CN}$ , 298 K) (bottom) spectra of **5**.

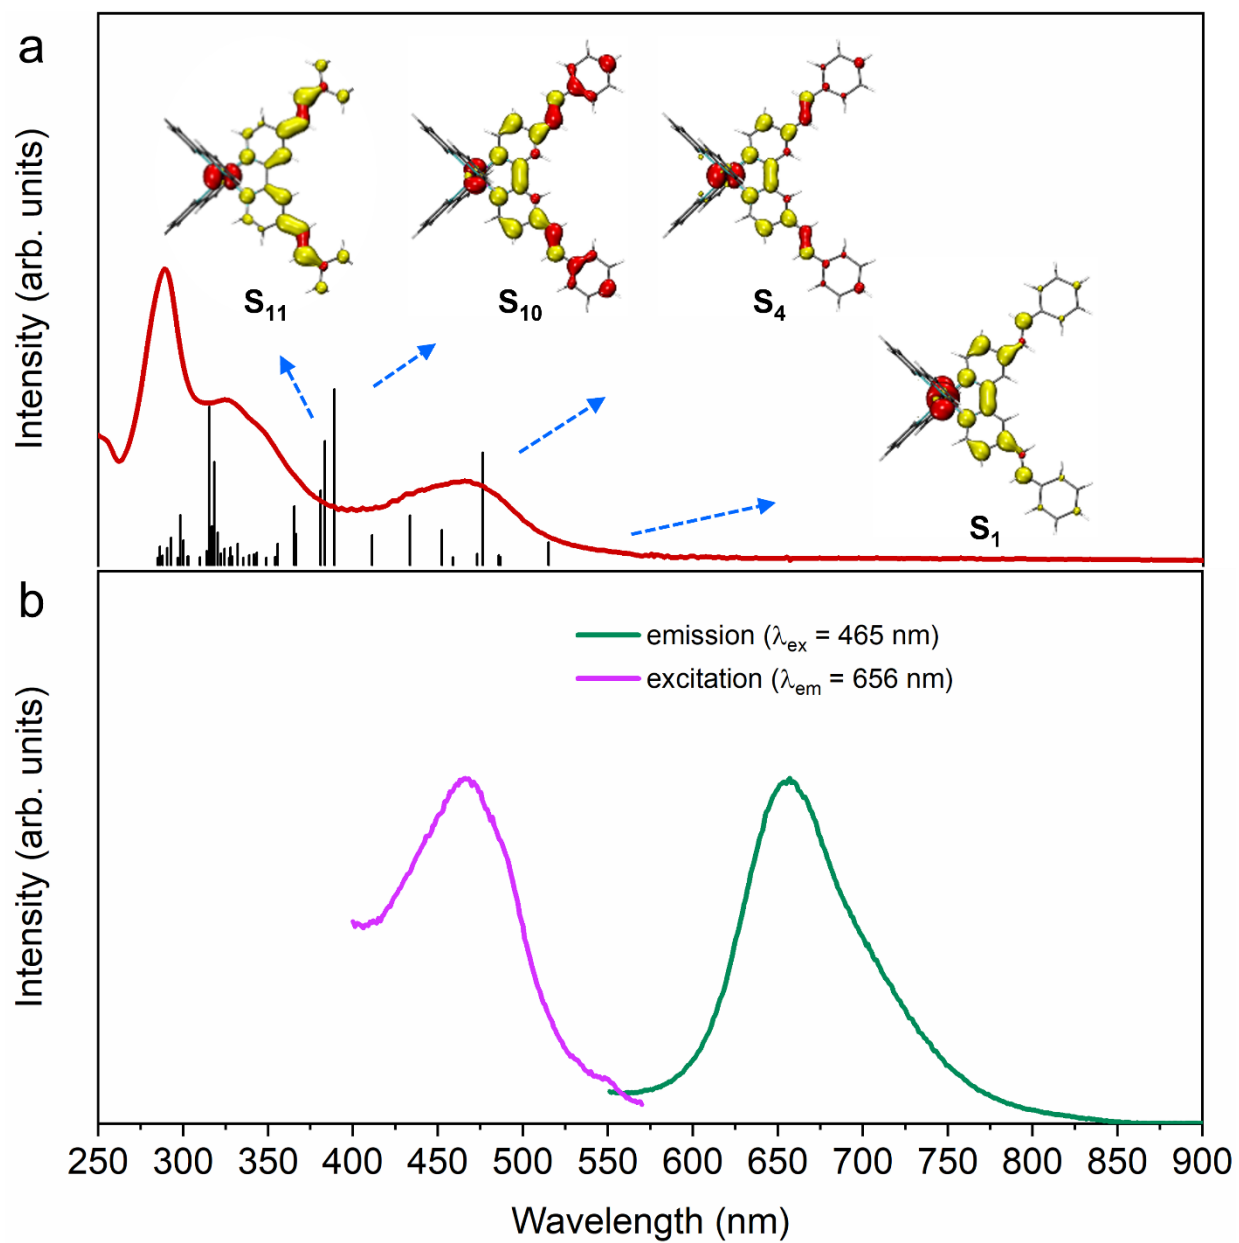

**Supplementary Figure 10.** (a) Absorption and (b) emission and excitation spectra of **1** in  $\text{CH}_3\text{CN}$ . *Insets* in (a) are the calculated EDDMs of selected singlet excited states of **1** (red indicates electron decrease and yellow indicates electron increase).



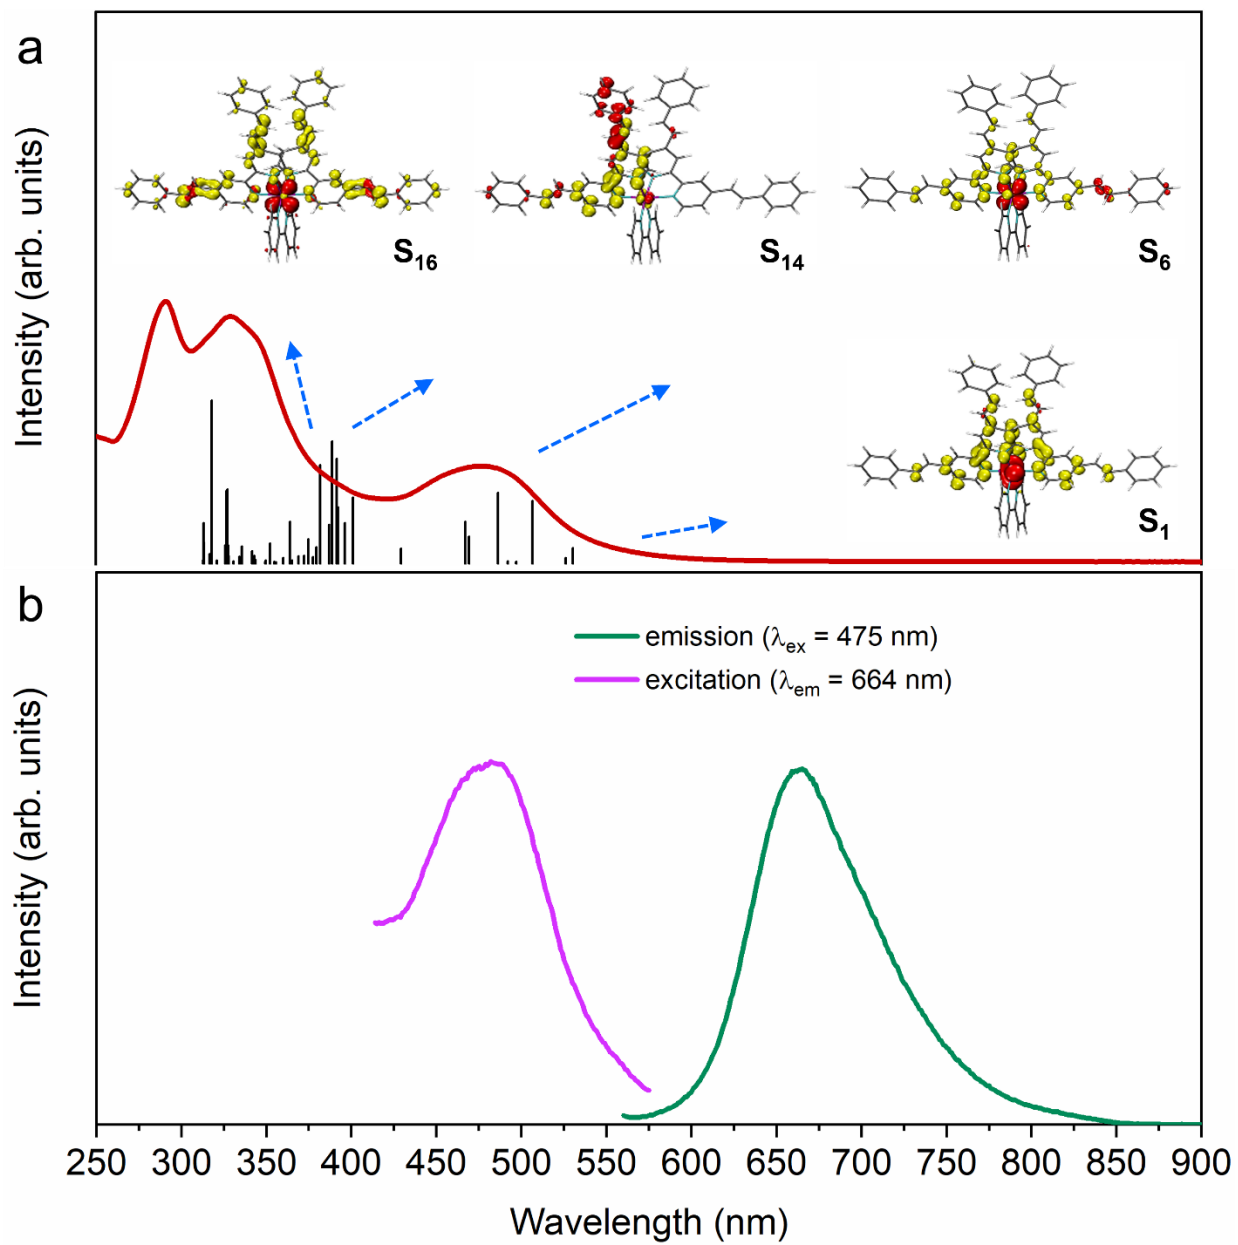

**Supplementary Figure 11.** (a) Absorption and (b) emission and excitation spectra of **2** in  $\text{CH}_3\text{CN}$ . *Insets* in (a) are the calculated EDDMs of selected singlet excited states of **2** (red indicates electron decrease and yellow indicates electron increase).

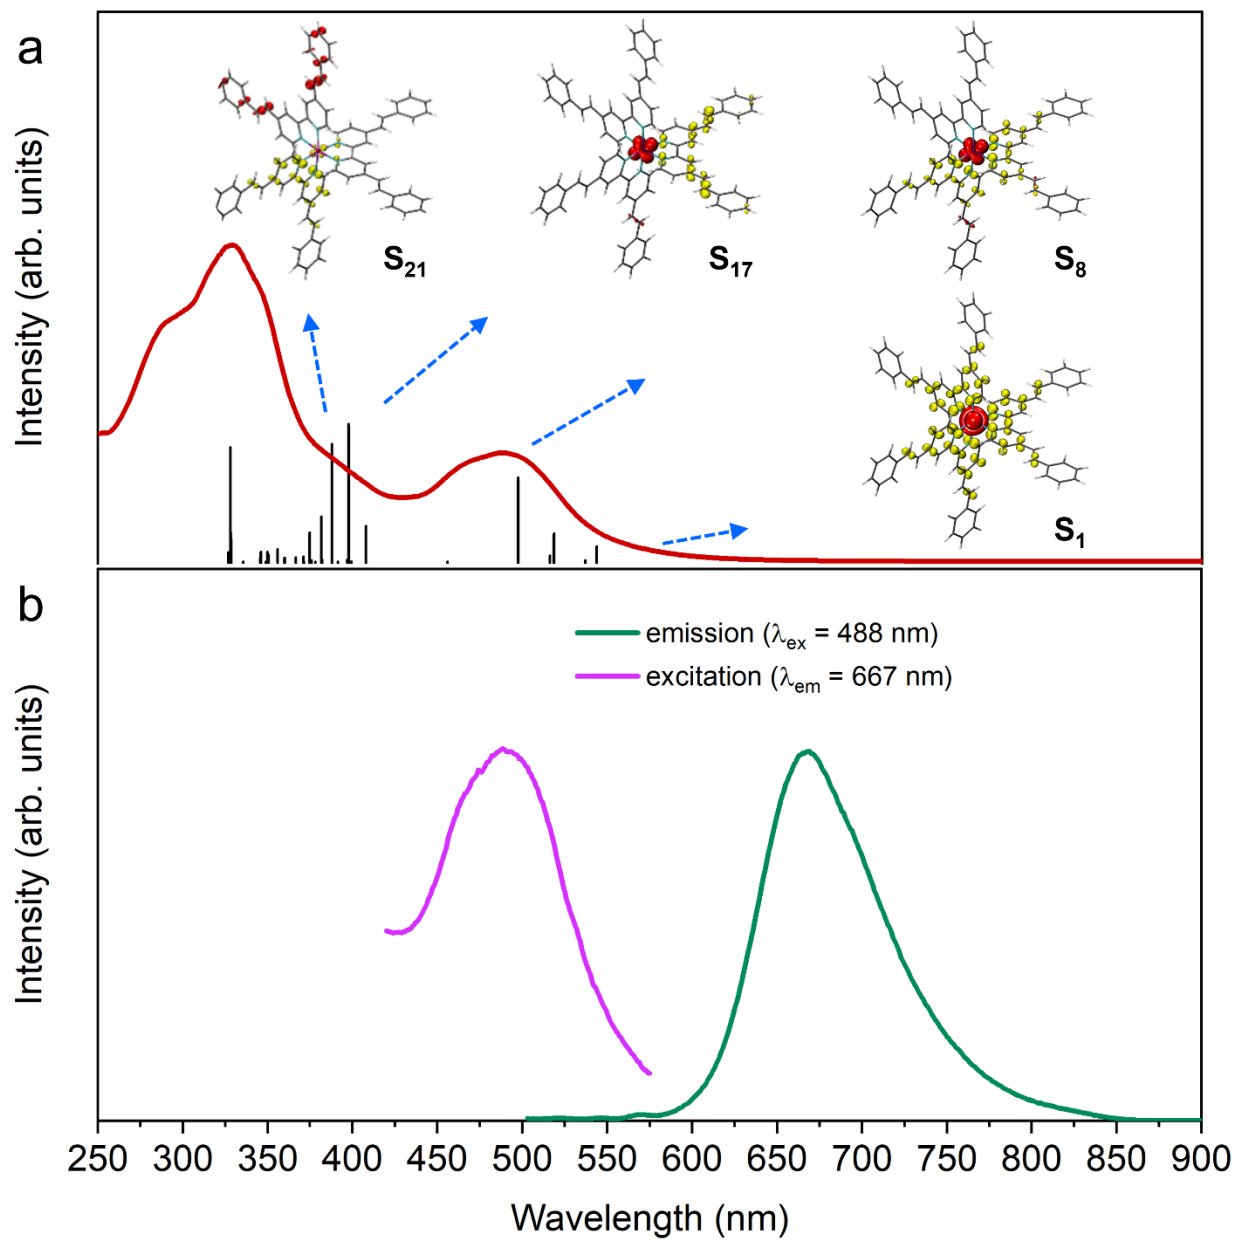

**Supplementary Figure 12.** (a) Absorption and (b) emission and excitation spectra of **3** in  $\text{CH}_3\text{CN}$ . *Insets* in (a) are the calculated EDDMs of selected singlet excited states of **3** (red indicates electron decrease and yellow indicates electron increase).

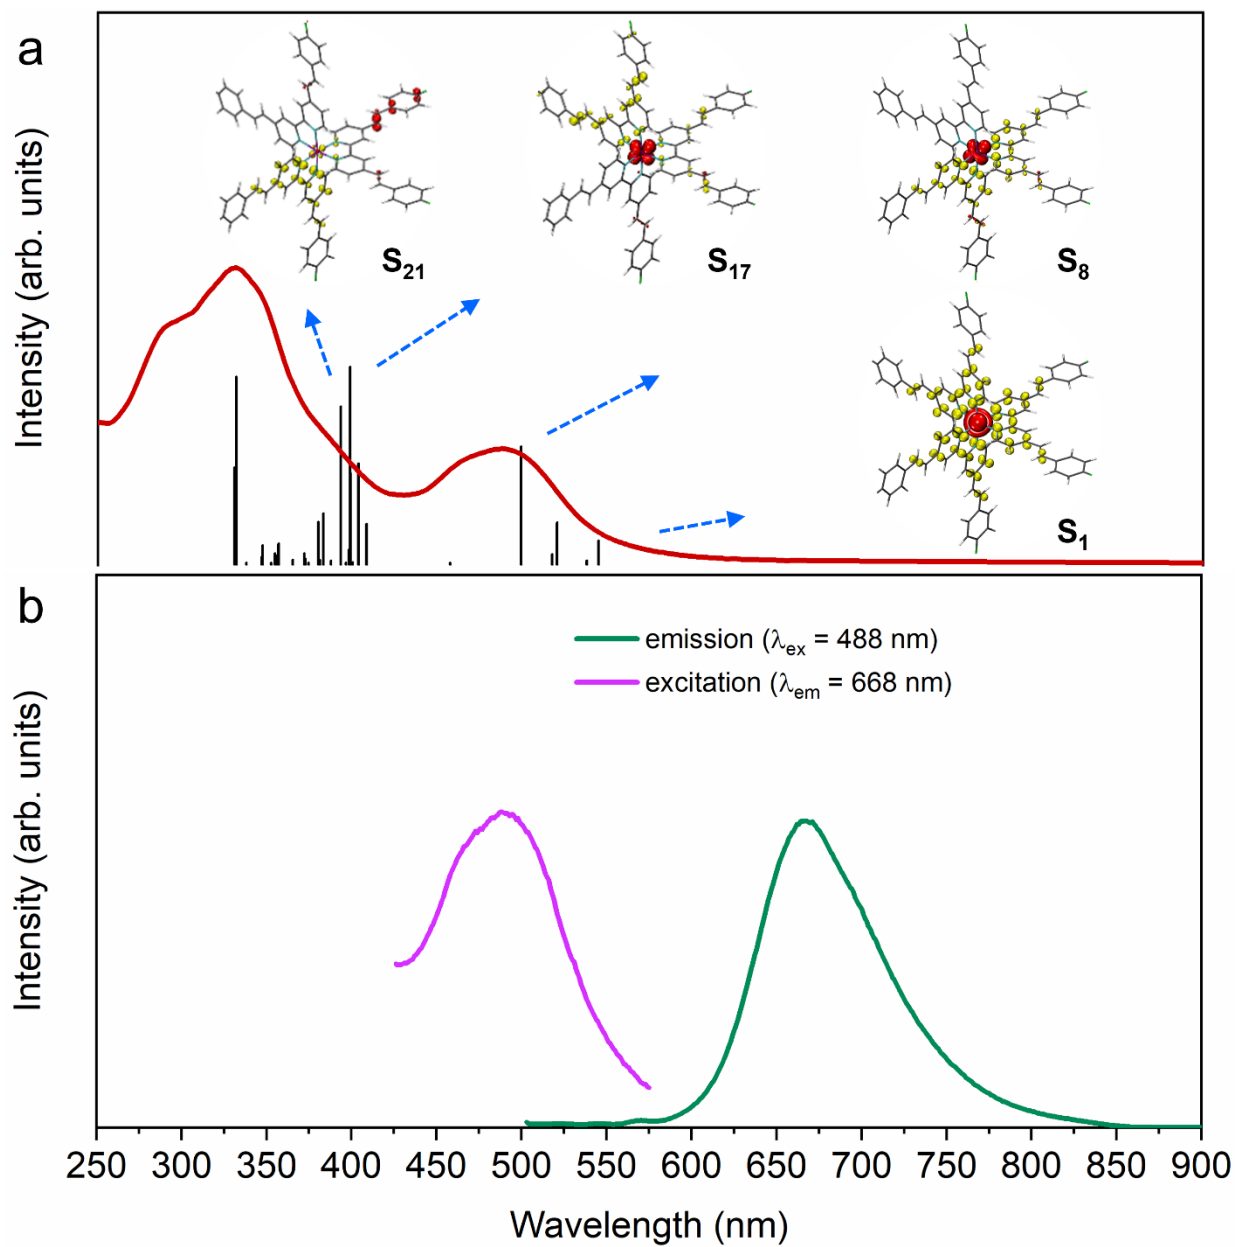

**Supplementary Figure 13.** (a) Absorption and (b) emission and excitation spectra of **4** in  $\text{CH}_3\text{CN}$ . *Insets* in (a) are the calculated EDDMs of selected singlet excited states of **4** (red indicates electron decrease and yellow indicates electron increase).

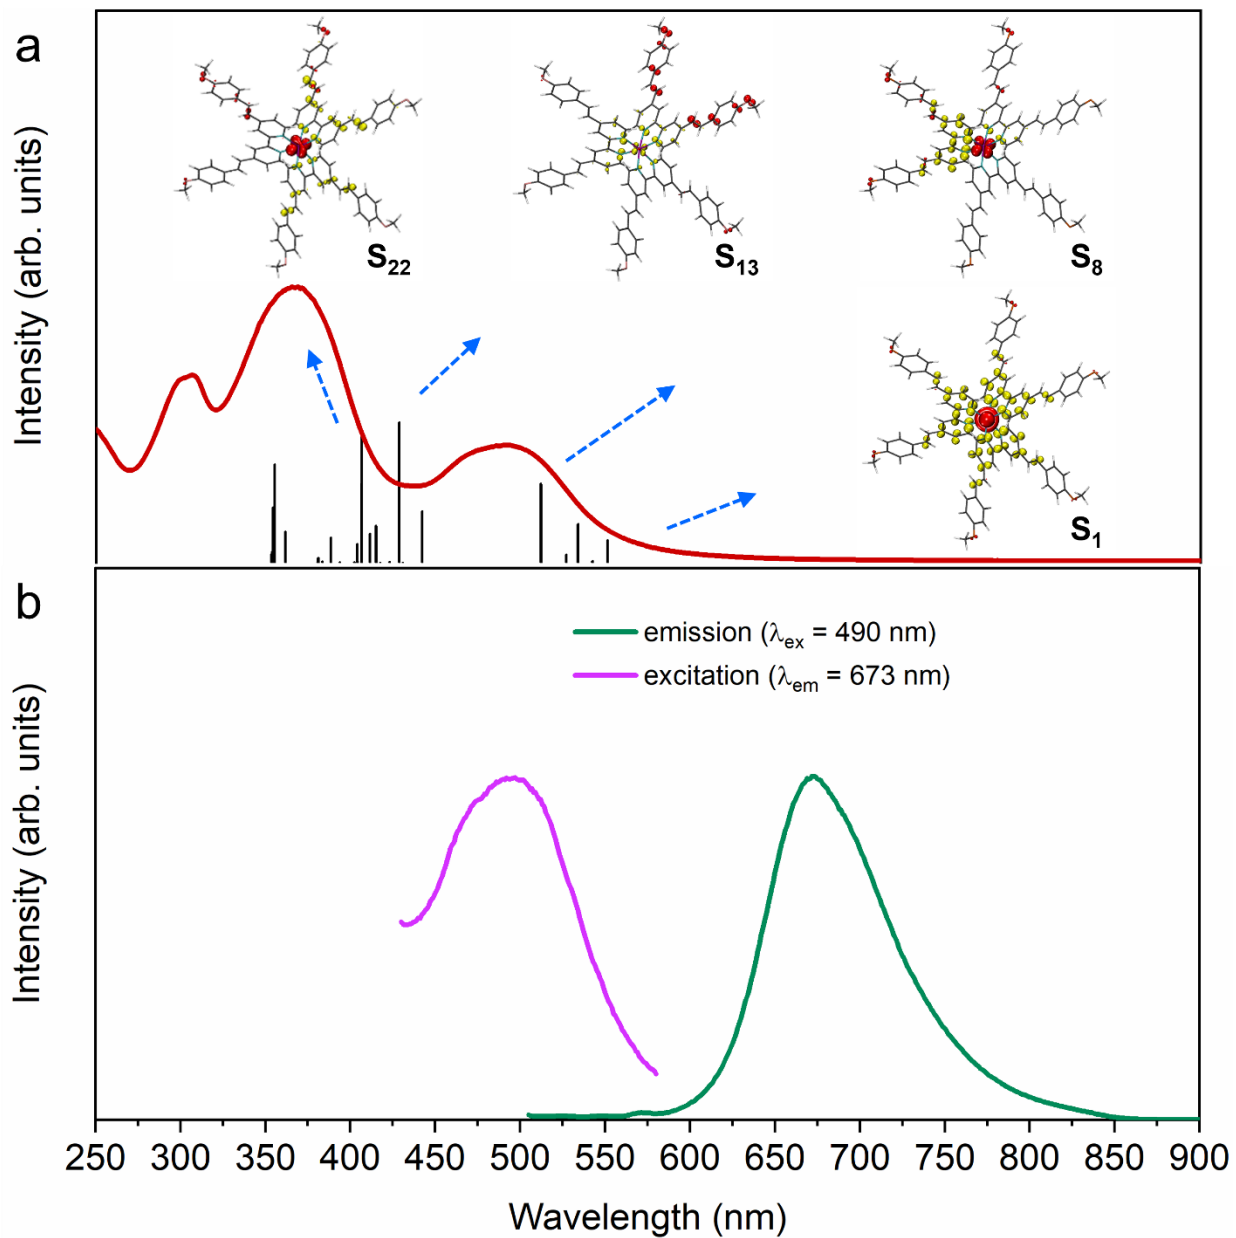

**Supplementary Figure 14.** (a) Absorption and (b) emission and excitation spectra of **5** in  $\text{CH}_3\text{CN}$ . *Insets* in (a) are the calculated EDDMs of selected singlet excited states of **5** (red indicates electron decrease and yellow indicates electron increase).

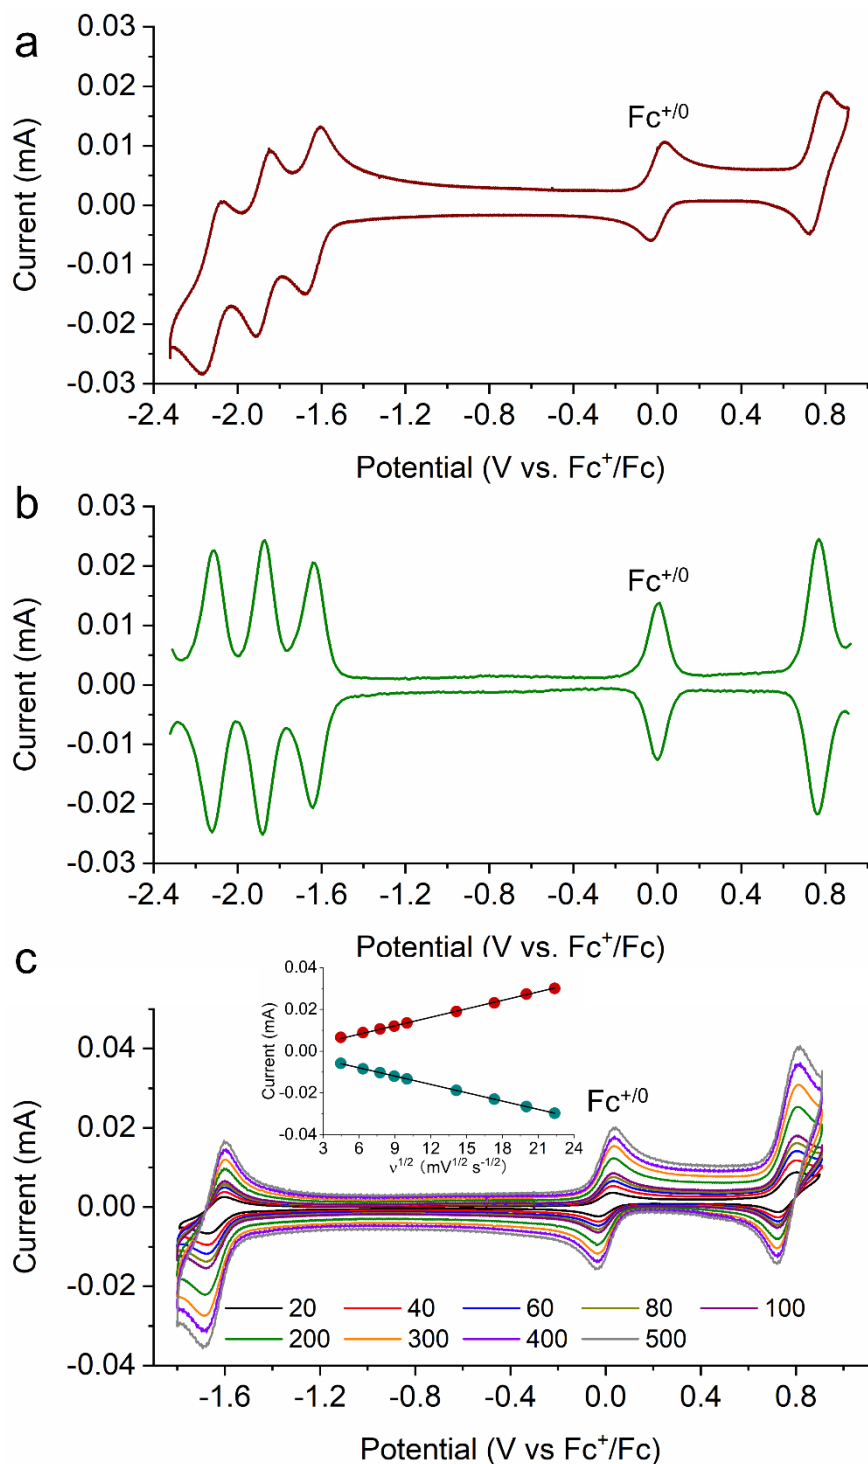

**Supplementary Figure 15.** Electrochemistry measurements of **1** in DMF: (a) cyclic voltammety, (b) square wave voltammety, and (c) cyclic voltammety with different scan rate ( $v$ ) ranging from 20 to 500 mV/s. Insert is the relationship between an oxidation peak (at 0.77 V vs  $\text{Fc}^{+/0}$ ) or a reduction peak (at -1.64 V vs  $\text{Fc}^{+/0}$ ) versus  $v^{1/2}$ . Condition: three electrode system with Pt wire as the counter electrode, glassy carbon as the working electrode and SCE as the reference electrode, 0.1 M  $\text{LiClO}_4$  in deaerated DMF. Scan rate of the cyclic voltammety is 100 mV/s.

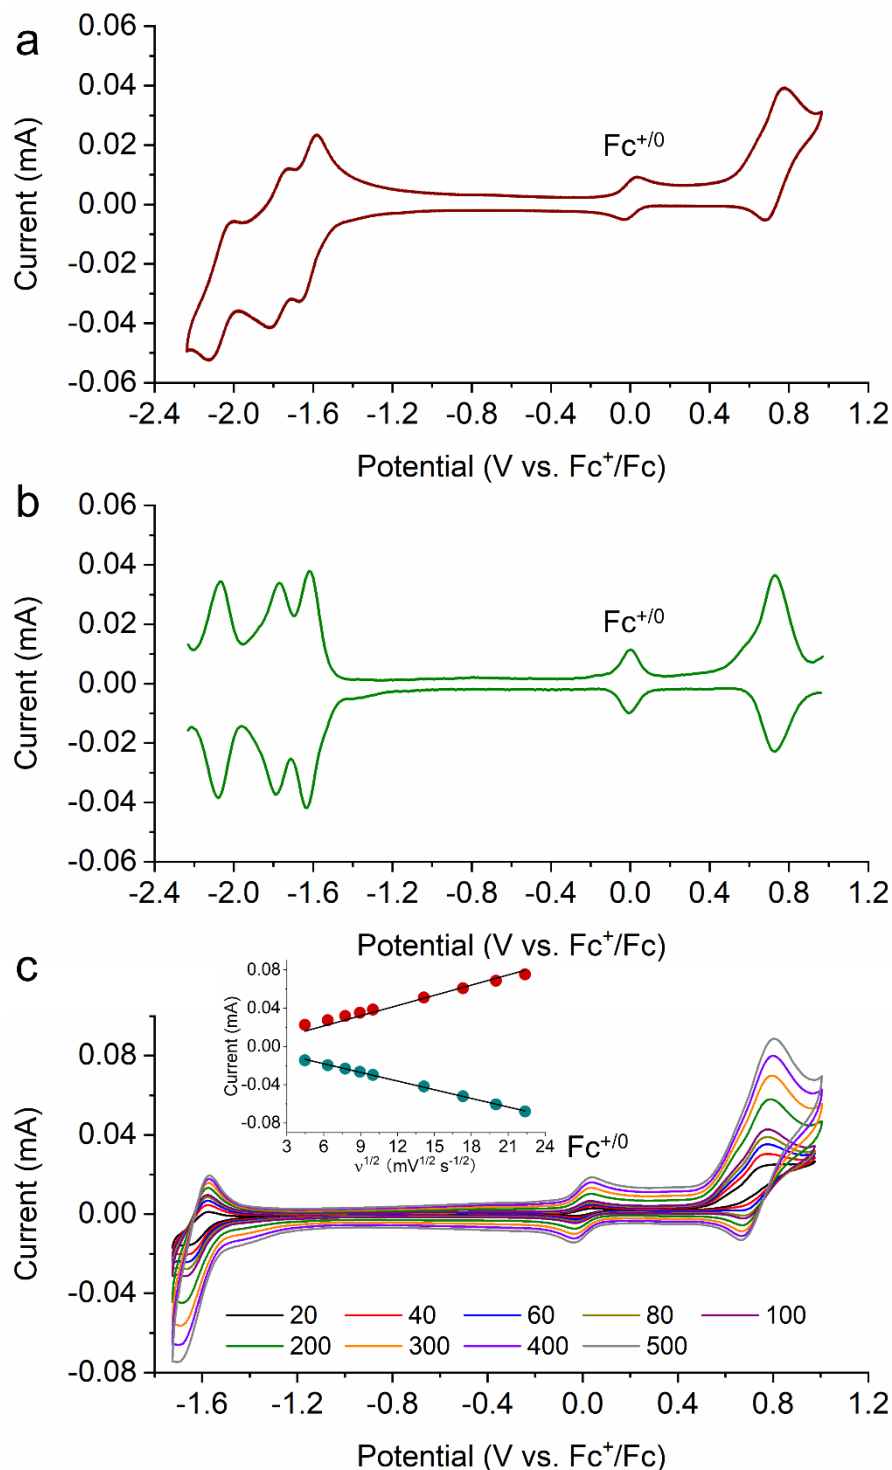

**Supplementary Figure 16.** Electrochemistry measurements of **2** in DMF: (a) cyclic voltammetry, (b) square wave voltammetry, and (c) cyclic voltammetry with different scan rate ( $v$ ) ranging from 20 to 500 mV/s. Insert is the relationship between an oxidation peak (at 0.73 V vs  $\text{Fc}^{+/0}$ ) or a reduction peak (at -1.63 V vs  $\text{Fc}^{+/0}$ ) versus  $v^{1/2}$ . Condition: three electrode system with Pt wire as the counter electrode, glassy carbon as the working electrode and SCE as the reference electrode, 0.1 M  $\text{LiClO}_4$  in deaerated DMF. Scan rate of the cyclic voltammetry is 100 mV/s.

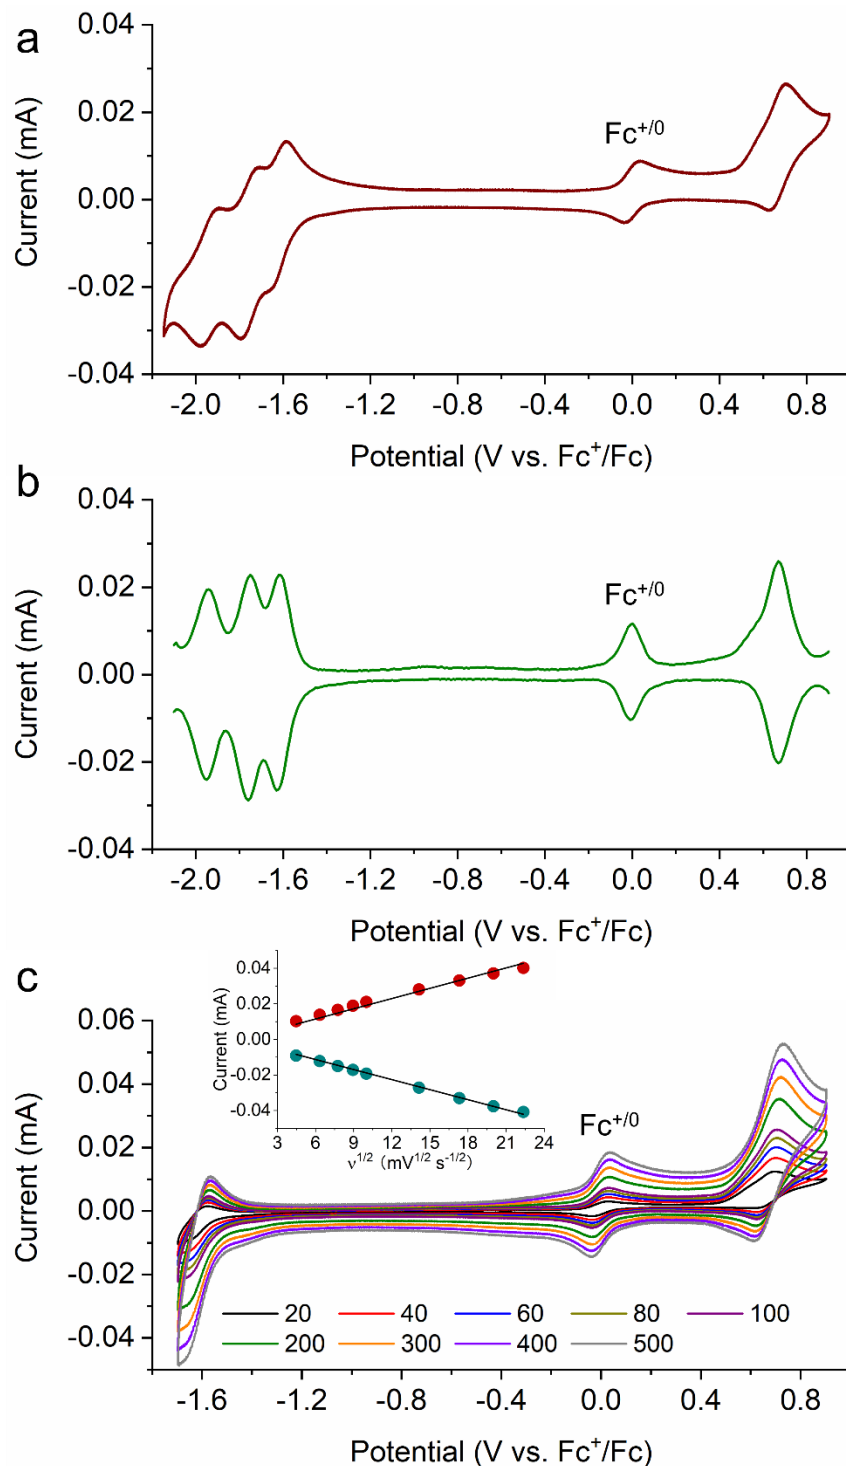

**Supplementary Figure 17.** Electrochemistry measurement of **3** in DMF: (a) cyclic voltammety, (b) square wave voltammety, and (c) cyclic voltammety with different scan rate ( $v$ ) ranging from 20 to 500 mV/s. Insert is the relationship between an oxidation peak (at 0.67 V vs Fc<sup>+/0</sup>) or a reduction peak (at -1.62 V vs Fc<sup>+/0</sup>) versus  $v^{1/2}$ . Condition: three electrode system with Pt wire as the counter electrode, glassy carbon as the working electrode and SCE as the reference electrode, 0.1 M LiClO<sub>4</sub> in deaerated DMF. Scan rate of the cyclic voltammety is 100 mV/s.

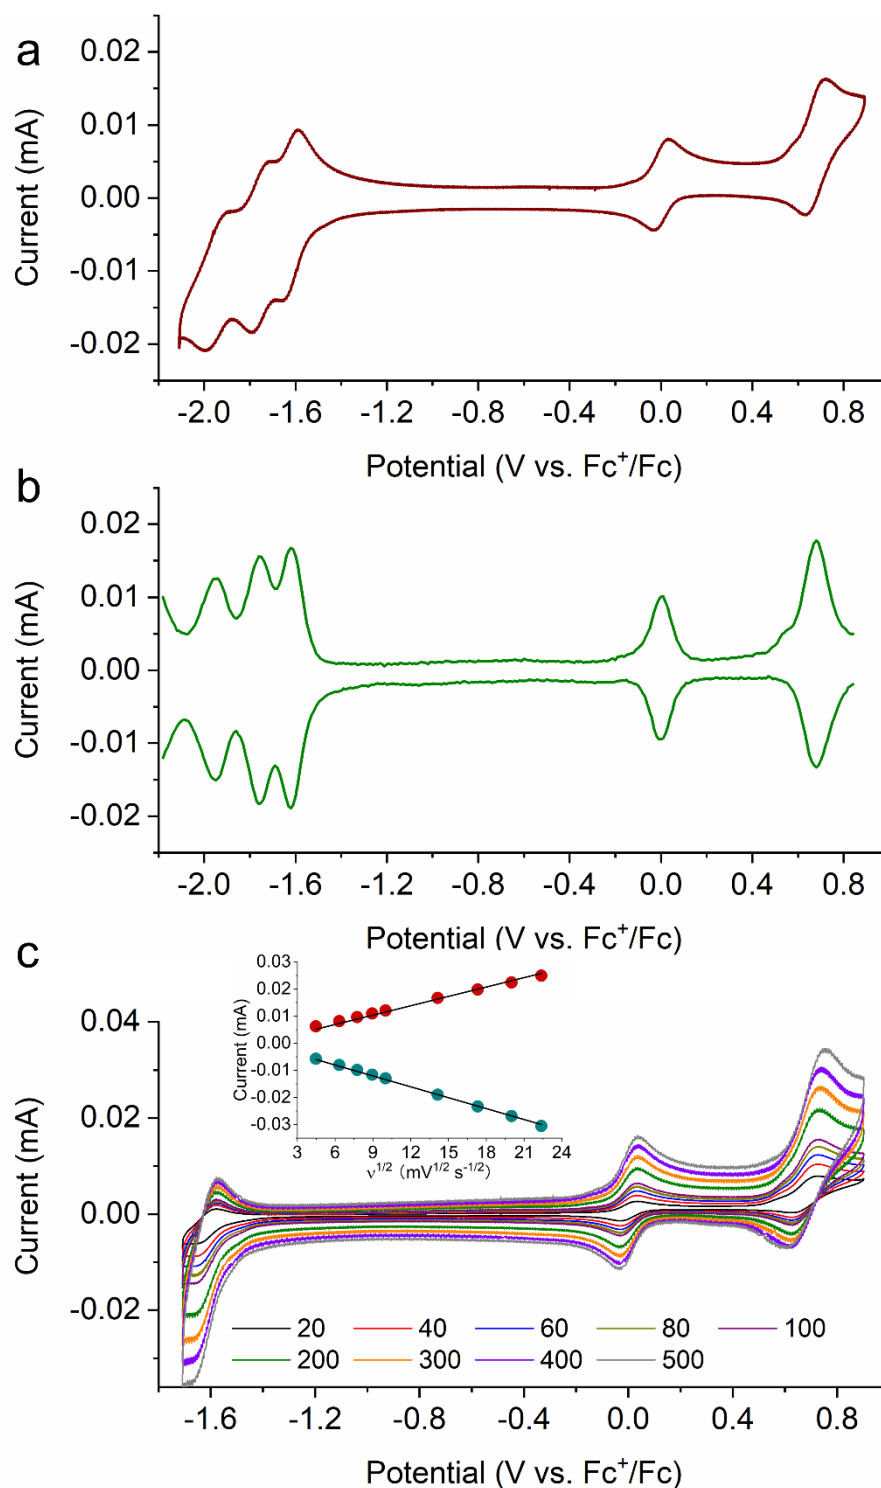

**Supplementary Figure 18.** Electrochemistry measurement of **4** in DMF: (a) cyclic voltammety, (b) square wave voltammety, and (c) cyclic voltammety with different scan rate ( $v$ ) ranging from 20 to 500 mV/s. Insert is the relationship between an oxidation peak current (at 0.68 V vs Fc<sup>+/0</sup>) or a reduction peak (at -1.62 V vs Fc<sup>+/0</sup>) versus  $v^{1/2}$ . Condition: three electrode system with Pt wire as the counter electrode, glassy carbon as the working electrode and SCE as the reference electrode, 0.1 M LiClO<sub>4</sub> in deaerated DMF. Scan rate of the cyclic voltammety is 100 mV/s.



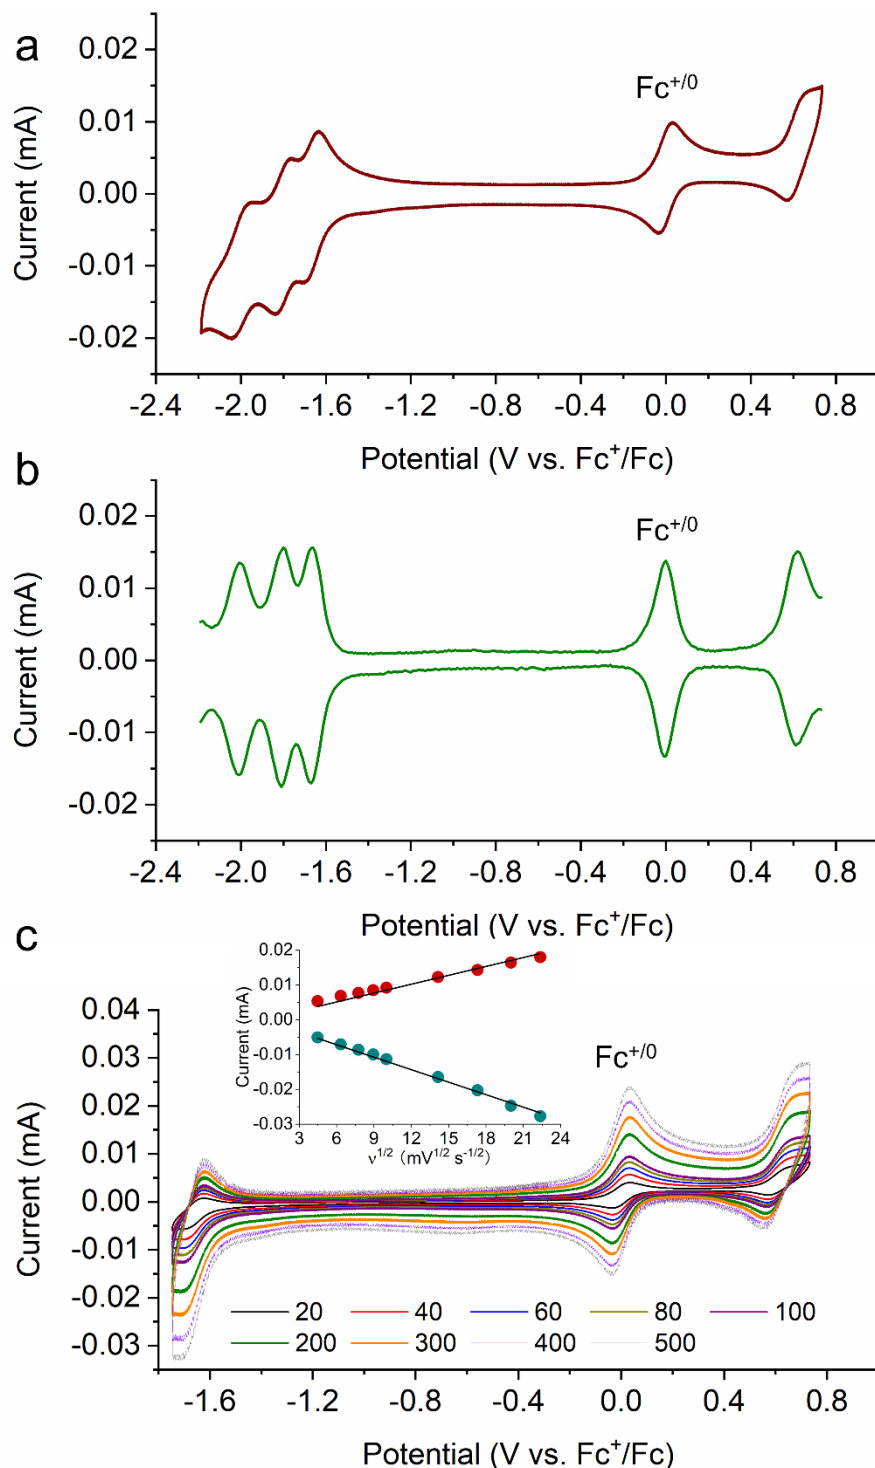

**Supplementary Figure 19.** Electrochemistry measurement of **5** in DMF: (a) cyclic voltammety, (b) square wave voltammety, and (c) cyclic voltammety with different scan rate ( $v$ ) ranging from 20 to 500 mV/s. Insert is the relationship between an oxidation peak current (at 0.62 V vs Fc<sup>+</sup>/0) or a reduction peak (at -1.67 V vs Fc<sup>+</sup>/0) versus  $v^{1/2}$ . Condition: three electrode system with Pt wire as the counter electrode, glassy carbon as the working electrode and SCE as the reference electrode, 0.1 M LiClO<sub>4</sub> in deaerated DMF. Scan rate of the cyclic voltammety is 100 mV/s.

**Supplementary Table 1.** Calculated MOs of **1** (Isovalue = 0.04).

| MOs               | Energy (eV)  | Orbitals                                                                              |
|-------------------|--------------|---------------------------------------------------------------------------------------|
| HOMO-5 (179)      | -7.13        | 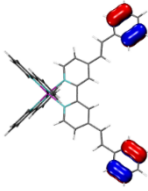   |
| HOMO-4 (180)      | -6.59        |    |
| HOMO-3 (181)      | -6.44        |    |
| HOMO-2 (182)      | -6.14        |   |
| HOMO-1 (183)      | -5.94        |  |
| <b>HOMO (184)</b> | <b>-5.90</b> |  |
| <b>LUMO (185)</b> | <b>-2.77</b> |  |

|              |       |                                                                                       |
|--------------|-------|---------------------------------------------------------------------------------------|
| LUMO+1 (186) | -2.52 | 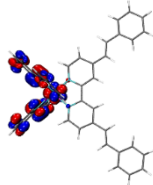   |
| LUMO+2 (187) | -2.46 |    |
| LUMO+3 (188) | -2.20 |    |
| LUMO+4 (189) | -1.83 |   |
| LUMO+5 (190) | -1.59 |  |

**Supplementary Table 2.** Calculated MOs of **2** (Isovalue = 0.04).

| MOs               | Energy       | Orbitals                                                                              |
|-------------------|--------------|---------------------------------------------------------------------------------------|
| HOMO-5 (233)      | -6.51        | 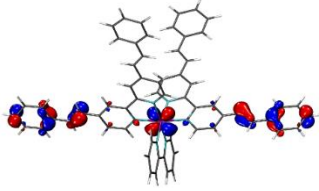   |
| HOMO-4 (234)      | 6.44         |    |
| HOMO-3 (235)      | -6.29        |    |
| HOMO-2 (236)      | -5.94        |   |
| HOMO-1 (237)      | -5.85        |  |
| <b>HOMO (238)</b> | <b>-5.79</b> |  |
| <b>LUMO (239)</b> | <b>-2.79</b> |  |

|              |       |                                                                                       |
|--------------|-------|---------------------------------------------------------------------------------------|
| LUMO+1 (240) | -2.69 | 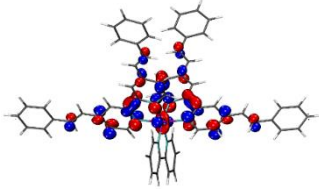   |
| LUMO+2 (241) | -2.47 |    |
| LUMO+3 (242) | -2.19 |    |
| LUMO+4 (243) | -2.18 |   |
| LUMO+5 (244) | -1.85 |  |

**Supplementary Table 3.** Calculated MOs of **3** (Isovalue = 0.04).

| MOs               | Energy (eV)  | Orbitals                                                                              |
|-------------------|--------------|---------------------------------------------------------------------------------------|
| HOMO-5 (287)      | -6.32        | 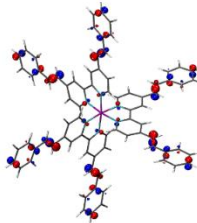   |
| HOMO-4 (288)      | -6.28        |    |
| HOMO-3 (289)      | -6.28        |   |
| HOMO-2 (290)      | -5.78        |  |
| HOMO-1 (291)      | -5.78        |  |
| <b>HOMO (292)</b> | <b>-5.74</b> |  |

|              |       |                                                                                       |
|--------------|-------|---------------------------------------------------------------------------------------|
| LUMO (293)   | -2.80 | 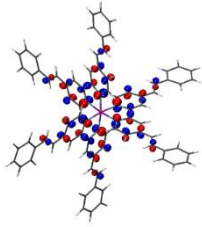   |
| LUMO+1 (294) | -2.68 |    |
| LUMO+2 (295) | -2.67 |    |
| LUMO+3 (296) | -2.18 |   |
| LUMO+4 (297) | -2.18 |  |
| LUMO+5 (298) | -2.16 |  |

**Supplementary Table 4.** Calculated MOs of **4** (Isovalue = 0.04).

| MOs               | Energy (eV)  | Orbitals                                                                              |
|-------------------|--------------|---------------------------------------------------------------------------------------|
| HOMO-5 (311)      | -6.27        | 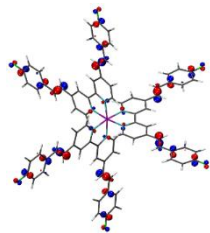   |
| HOMO-4 (312)      | -6.23        |    |
| HOMO-3 (313)      | -6.23        |   |
| HOMO-2 (314)      | -5.77        |  |
| HOMO-1 (315)      | -5.77        |  |
| <b>HOMO (316)</b> | <b>-5.73</b> |  |



|              |       |                                                                                       |
|--------------|-------|---------------------------------------------------------------------------------------|
| LUMO (317)   | -2.80 | 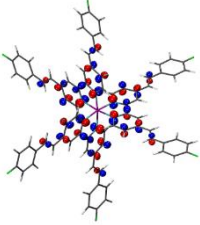   |
| LUMO+1 (318) | -2.68 |    |
| LUMO+2 (319) | -2.67 |    |
| LUMO+3 (320) | -2.18 |   |
| LUMO+4 (321) | -2.18 |  |
| LUMO+5 (322) | -2.15 |  |

**Supplementary Table 5.** Calculated MOs of **5** (Isovalue = 0.04).

| MOs               | Energy       | Orbitals                                                                              |
|-------------------|--------------|---------------------------------------------------------------------------------------|
| HOMO-5 (335)      | -5.86        | 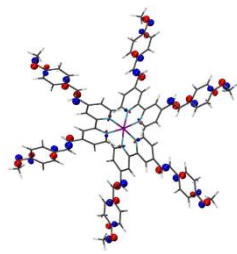   |
| HOMO-4 (336)      | -5.82        |    |
| HOMO-3 (337)      | -5.82        |   |
| HOMO-2 (338)      | -5.54        |  |
| HOMO-1 (339)      | -5.54        |  |
| <b>HOMO (340)</b> | <b>-5.53</b> |  |

|              |       |                                                                                       |
|--------------|-------|---------------------------------------------------------------------------------------|
| LUMO (341)   | -2.69 | 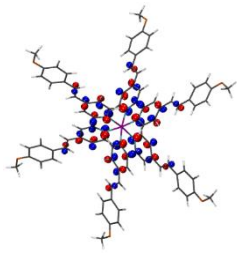   |
| LUMO+1 (342) | -2.56 |    |
| LUMO+2 (343) | -2.56 |    |
| LUMO+3 (344) | -2.04 |  |
| LUMO+4 (345) | -2.04 |  |
| LUMO+5 (346) | -2.02 |  |

**Supplementary Table 6.** Calculated singlet electronic transitions ( $f > 0.01$ ) of **1** in CH<sub>3</sub>CN (Isovalue = 0.04).

| No. | Wavelength (nm) | $f$   | Major contributions                                | EDDM                                                                                  |
|-----|-----------------|-------|----------------------------------------------------|---------------------------------------------------------------------------------------|
| 1   | 515             | 0.050 | HOMO->LUMO (89%)                                   | 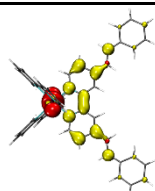   |
| 4   | 476             | 0.34  | H-1->LUMO (80%), H-1->L+1 (12%)                    |    |
| 5   | 473             | 0.014 | H-2->LUMO (82%)                                    |    |
| 7   | 452             | 0.089 | H-2->L+2 (19%), H-1->L+1 (65%)                     |   |
| 8   | 433             | 0.14  | H-2->L+1 (74%), H-1->L+2 (16%)                     |  |
| 9   | 411             | 0.073 | H-2->L+2 (58%), H-1->L+1 (10%),<br>HOMO->L+3 (20%) |  |
| 10  | 389             | 0.54  | H-3->LUMO (90%)                                    |  |
| 11  | 383             | 0.37  | H-1->L+3 (96%)                                     |  |

|    |     |       |                                                    |                                                                                       |
|----|-----|-------|----------------------------------------------------|---------------------------------------------------------------------------------------|
| 12 | 381 | 0.22  | H-2->L+2 (11%), H-2->L+3 (10%),<br>HOMO->L+3 (66%) | 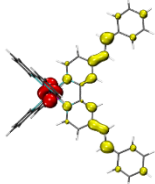   |
| 13 | 366 | 0.077 | H-4->LUMO (10%), H-2->L+3 (77%)                    |    |
| 14 | 366 | 0.065 | HOMO->L+4 (91%)                                    |    |
| 15 | 365 | 0.17  | H-4->LUMO (84%)                                    |    |
| 16 | 356 | 0.046 | H-1->L+4 (92%)                                     |   |
| 19 | 343 | 0.016 | H-2->L+4 (61%), HOMO->L+5 (28%)                    |  |
| 21 | 342 | 0.011 | H-2->L+4 (28%), HOMO->L+5 (59%)                    |  |
| 24 | 332 | 0.046 | H-1->L+5 (58%), HOMO->L+7 (26%)                    |  |

|    |     |       |                                                      |                                                                                       |
|----|-----|-------|------------------------------------------------------|---------------------------------------------------------------------------------------|
| 27 | 328 | 0.033 | H-1->L+6 (10%), HOMO->L+8 (48%),<br>HOMO->L+15 (10%) | 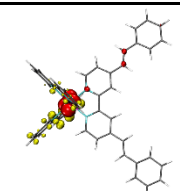   |
| 29 | 324 | 0.029 | H-2->L+5 (26%), H-1->L+6 (24%),<br>HOMO->L+8 (29%)   |    |
| 30 | 322 | 0.014 | H-1->L+7 (71%)                                       |    |
| 31 | 320 | 0.081 | H-2->L+5 (55%), H-1->L+6 (17%)                       |    |
| 32 | 318 | 0.31  | H-3->L+3 (74%), H-1->L+8 (13%)                       |   |
| 33 | 317 | 0.028 | H-2->L+6 (69%), H-2->L+7 (12%)                       |  |
| 34 | 317 | 0.10  | H-2->L+7 (24%), H-1->L+8 (49%)                       |  |
| 35 | 317 | 0.051 | H-2->L+15 (36%), H-1->L+16 (21%)                     |  |

|    |     |       |                                                |                                                                                       |
|----|-----|-------|------------------------------------------------|---------------------------------------------------------------------------------------|
| 36 | 315 | 0.49  | H-7->LUMO (19%), H-4->L+3 (64%)                | 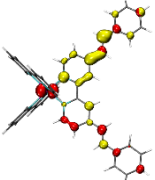   |
| 37 | 314 | 0.022 | H-5->LUMO (92%)                                |    |
| 42 | 300 | 0.057 | H-9->LUMO (31%), H-3->L+4 (53%)                |    |
| 43 | 298 | 0.14  | H-9->LUMO (59%), H-3->L+4 (17%)                |    |
| 45 | 293 | 0.065 | H-4->L+4 (84%)                                 |   |
| 46 | 290 | 0.033 | H-7->L+1 (92%)                                 |  |
| 48 | 286 | 0.036 | H-9->L+2 (25%), H-8->L+1 (39%), H-7->L+2 (31%) |  |

**Supplementary Table 7.** Calculated singlet electronic transitions ( $f > 0.01$ ) of **2** in CH<sub>3</sub>CN (Isovalue = 0.04).

| No. | Wavelength (nm) | $f$   | Major contributions                                              | EDDM                                                                                  |
|-----|-----------------|-------|------------------------------------------------------------------|---------------------------------------------------------------------------------------|
| 1   | 530             | 0.063 | H-1->LUMO (19%), HOMO->LUMO (74%)                                | 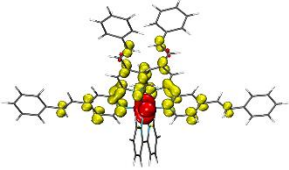   |
| 2   | 526             | 0.019 | H-1->L+1 (33%), HOMO->L+1 (60%)                                  |    |
| 3   | 507             | 0.28  | H-1->LUMO (70%), HOMO->LUMO (19%)                                |    |
| 6   | 486             | 0.31  | H-2->L+1 (71%), H-1->L+2 (10%)                                   |   |
| 7   | 469             | 0.12  | H-2->L+1 (15%), H-1->L+2 (63%), HOMO->L+2 (15%)                  |  |
| 8   | 467             | 0.18  | H-2->LUMO (20%), H-2->L+2 (15%), H-1->L+1 (35%), HOMO->L+1 (20%) |  |
| 9   | 429             | 0.061 | H-2->L+2 (68%), HOMO->L+4 (13%)                                  |  |
| 10  | 401             | 0.29  | HOMO->L+3 (87%)                                                  |  |



|    |     |       |                                                    |                                                                                       |
|----|-----|-------|----------------------------------------------------|---------------------------------------------------------------------------------------|
| 11 | 396 | 0.18  | H-3->LUMO (85%)                                    | 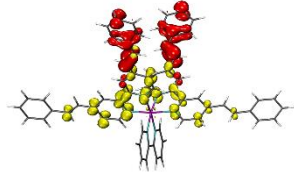   |
| 12 | 392 | 0.25  | H-1->L+4 (70%), HOMO->L+4 (25%)                    |    |
| 13 | 392 | 0.47  | H-1->L+3 (87%), HOMO->L+3 (10%)                    |    |
| 14 | 389 | 0.55  | H-4->LUMO (39%), H-3->L+1 (53%)                    |    |
| 15 | 387 | 0.17  | H-2->L+3 (35%), H-1->L+4 (18%),<br>HOMO->L+4 (28%) |   |
| 16 | 382 | 0.44  | H-2->L+4 (90%)                                     |  |
| 17 | 380 | 0.067 | H-4->LUMO (49%), H-3->L+1 (40%)                    |  |
| 18 | 378 | 0.022 | H-5->LUMO (42%), H-4->L+1 (29%),<br>H-2->L+3 (15%) |  |

|    |     |       |                                                    |                                                                                       |
|----|-----|-------|----------------------------------------------------|---------------------------------------------------------------------------------------|
| 19 | 375 | 0.10  | H-1->L+5 (12%), HOMO->L+5 (80%)                    | 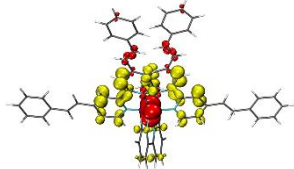   |
| 20 | 372 | 0.027 | H-4->L+1 (17%), H-2->L+3 (38%),<br>HOMO->L+4 (15%) |    |
| 21 | 369 | 0.026 | H-5->LUMO (48%), H-4->L+1 (39%)                    |    |
| 23 | 364 | 0.18  | H-5->L+1 (71%), H-1->L+5 (15%)                     |    |
| 24 | 360 | 0.019 | H-6->LUMO (90%)                                    |   |
| 27 | 352 | 0.085 | H-6->L+1 (25%), HOMO->L+6 (55%)                    |  |
| 31 | 343 | 0.028 | HOMO->L+7 (72%)                                    |  |
| 32 | 342 | 0.050 | H-1->L+6 (52%), HOMO->L+6 (17%)                    |  |

|    |     |       |                                                                 |                                                                                       |
|----|-----|-------|-----------------------------------------------------------------|---------------------------------------------------------------------------------------|
| 33 | 336 | 0.070 | H-2->L+6 (64%), H-1->L+7 (17%)                                  | 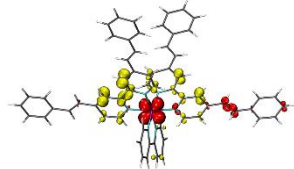   |
| 35 | 334 | 0.025 | HOMO->L+8 (81%)                                                 |    |
| 37 | 328 | 0.026 | HOMO->L+19 (56%)                                                |    |
| 38 | 328 | 0.075 | H-3->L+3 (18%), H-1->L+20 (30%)                                 |    |
| 39 | 327 | 0.33  | H-3->L+4 (91%)                                                  |   |
| 40 | 327 | 0.32  | H-3->L+3 (58%), H-1->L+8 (23%)                                  |  |
| 41 | 326 | 0.076 | H-3->L+3 (12%), H-2->L+7 (30%), H-1->L+8 (27%), H-1->L+20 (10%) |  |
| 43 | 318 | 0.73  | H-5->L+4 (21%), H-4->L+3 (62%)                                  |  |

|    |     |       |                                                     |                                                                                      |
|----|-----|-------|-----------------------------------------------------|--------------------------------------------------------------------------------------|
| 44 | 317 | 0.035 | H-2->L+20 (25%), H-1->L+19 (22%)                    | 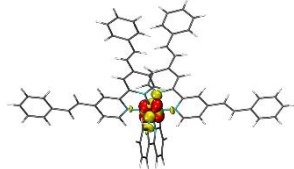  |
| 46 | 313 | 0.088 | H-5->L+3 (18%), H-4->L+4 (43%)                      |   |
| 47 | 313 | 0.18  | H-5->L+4 (43%), H-4->L+3 (23%)                      |   |
| 48 | 313 | 0.030 | H-8->LUMO (16%), H-8->L+1 (18%),<br>H-7->LUMO (48%) |   |
| 49 | 313 | 0.048 | H-8->LUMO (47%), H-7->LUMO<br>(18%), H-7->L+1 (18%) |  |

**Supplementary Table 8.** Calculated singlet electronic transitions ( $f > 0.01$ ) of **3** in CH<sub>3</sub>CN (Isovalue = 0.04).

| No. | Wavelength (nm) | $f$   | Major contributions                                            | EDDM                                                                                  |
|-----|-----------------|-------|----------------------------------------------------------------|---------------------------------------------------------------------------------------|
| 1   | 544             | 0.085 | HOMO->LUMO (96%)                                               | 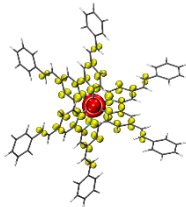   |
| 4   | 519             | 0.15  | H-1->LUMO (94%)                                                |    |
| 5   | 518             | 0.15  | H-2->LUMO (94%)                                                |    |
| 6   | 516             | 0.033 | H-2->L+2 (45%), H-1->L+1 (48%)                                 |   |
| 7   | 498             | 0.45  | H-2->L+1 (25%), H-2->L+2 (22%), H-1->L+1 (21%), H-1->L+2 (24%) |  |
| 8   | 497             | 0.46  | H-2->L+1 (22%), H-2->L+2 (25%), H-1->L+1 (24%), H-1->L+2 (22%) |  |
| 10  | 408             | 0.20  | HOMO->L+3 (95%)                                                |  |

|    |     |       |                                                                |                                                                                       |
|----|-----|-------|----------------------------------------------------------------|---------------------------------------------------------------------------------------|
| 11 | 408 | 0.19  | HOMO->L+4 (95%)                                                | 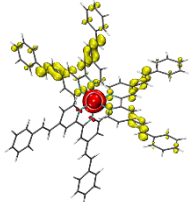   |
| 14 | 398 | 0.034 | H-3->LUMO (53%), H-2->L+5 (17%), H-1->L+4 (10%)                |    |
| 15 | 398 | 0.74  | H-4->LUMO (42%), H-1->L+5 (46%)                                |    |
| 16 | 398 | 0.71  | H-3->LUMO (30%), H-2->L+5 (51%)                                |   |
| 17 | 398 | 0.75  | H-2->L+4 (38%), H-1->L+3 (38%)                                 |  |
| 19 | 397 | 0.013 | H-2->L+3 (28%), H-2->L+4 (11%), H-2->L+5 (24%), H-1->L+4 (23%) |  |
| 21 | 388 | 0.64  | H-6->LUMO (20%), H-4->L+2 (34%), H-3->L+1 (37%)                |  |
| 24 | 382 | 0.25  | HOMO->L+6 (91%)                                                |  |

|    |     |       |                                 |                                                                                       |
|----|-----|-------|---------------------------------|---------------------------------------------------------------------------------------|
| 27 | 375 | 0.16  | H-5->L+1 (81%)                  | 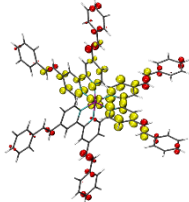   |
| 28 | 375 | 0.16  | H-5->L+2 (81%)                  |    |
| 30 | 371 | 0.029 | H-1->L+6 (93%)                  |    |
| 31 | 371 | 0.029 | H-2->L+6 (93%)                  |   |
| 32 | 367 | 0.024 | H-8->LUMO (13%), H-6->L+1 (73%) |  |
| 33 | 367 | 0.024 | H-7->LUMO (13%), H-6->L+2 (73%) |  |
| 34 | 360 | 0.021 | H-7->LUMO (77%), H-6->L+2 (14%) |  |
| 35 | 360 | 0.021 | H-8->LUMO (77%), H-6->L+1 (13%) |  |

|    |     |       |                                                                |                                                                                       |
|----|-----|-------|----------------------------------------------------------------|---------------------------------------------------------------------------------------|
| 36 | 356 | 0.069 | HOMO->L+7 (92%)                                                | 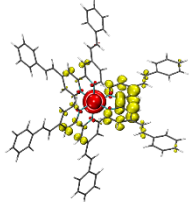   |
| 37 | 356 | 0.067 | HOMO->L+8 (91%)                                                |    |
| 38 | 350 | 0.037 | H-8->L+1 (43%), H-7->L+2 (41%)                                 |    |
| 39 | 350 | 0.054 | H-8->L+2 (33%), H-7->L+1 (43%)                                 |   |
| 40 | 350 | 0.053 | H-8->L+1 (38%), H-7->L+2 (38%)                                 |  |
| 42 | 346 | 0.054 | H-2->L+7 (22%), H-1->L+7 (26%), H-1->L+8 (29%)                 |  |
| 43 | 346 | 0.053 | H-2->L+7 (21%), H-2->L+8 (14%), H-1->L+7 (38%), H-1->L+8 (13%) |  |
| 44 | 346 | 0.021 | H-2->L+8 (62%), H-1->L+7 (20%)                                 |  |



|    |     |       |                                                                         |  |
|----|-----|-------|-------------------------------------------------------------------------|--|
| 46 | 328 | 0.12  | H-2->L+23 (10%), H-1->L+22 (10%),<br>HOMO->L+22 (32%), HOMO->L+23 (11%) |  |
| 47 | 328 | 0.16  | H-2->L+22 (11%), H-1->L+23 (11%),<br>HOMO->L+23 (29%)                   |  |
| 48 | 328 | 0.62  | H-5->L+4 (15%), H-4->L+3 (32%), H-3->L+4<br>(32%)                       |  |
| 49 | 328 | 0.62  | H-5->L+3 (15%), H-4->L+4 (31%), H-3->L+3<br>(33%)                       |  |
| 50 | 327 | 0.052 | H-5->L+3 (29%), H-3->L+5 (51%)                                          |  |

**Supplementary Table 9.** Calculated singlet electronic transitions ( $f > 0.01$ ) of **4** in CH<sub>3</sub>CN (Isovalue = 0.04).

| No. | Wavelength (nm) | $f$   | Major contributions                                            | EDDM                                                                                  |
|-----|-----------------|-------|----------------------------------------------------------------|---------------------------------------------------------------------------------------|
| 1   | 545             | 0.089 | HOMO->LUMO (95%)                                               |    |
| 4   | 520             | 0.16  | H-1->LUMO (91%)                                                |    |
| 5   | 520             | 0.16  | H-2->LUMO (91%)                                                |    |
| 6   | 517             | 0.034 | H-2->L+2 (45%), H-1->L+1 (47%)                                 |   |
| 7   | 499             | 0.45  | H-2->L+1 (13%), H-2->L+2 (33%), H-1->L+1 (32%), H-1->L+2 (13%) |  |
| 8   | 499             | 0.46  | H-2->L+1 (33%), H-2->L+2 (14%), H-1->L+1 (13%), H-1->L+2 (33%) |  |
| 10  | 408             | 0.15  | HOMO->L+3 (93%)                                                |  |

|    |     |       |                                                                |                                                                                       |
|----|-----|-------|----------------------------------------------------------------|---------------------------------------------------------------------------------------|
| 11 | 408 | 0.15  | HOMO->L+4 (93%)                                                | 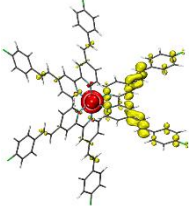   |
| 12 | 403 | 0.40  | H-4->LUMO (23%), H-3->LUMO (64%)                               |    |
| 13 | 403 | 0.40  | H-4->LUMO (64%), H-3->LUMO (23%)                               |    |
| 15 | 398 | 0.36  | H-2->L+3 (11%), H-1->L+4 (11%), H-1->L+5 (68%)                 |   |
| 16 | 398 | 0.39  | H-2->L+5 (55%), H-1->L+3 (33%)                                 |  |
| 17 | 398 | 0.78  | H-2->L+4 (51%), H-2->L+5 (10%), H-1->L+3 (28%)                 |  |
| 18 | 398 | 0.053 | H-2->L+4 (37%), H-2->L+5 (13%), H-1->L+3 (25%), H-1->L+5 (14%) |  |
| 19 | 398 | 0.051 | H-2->L+3 (30%), H-2->L+5 (16%), H-1->L+4 (30%), H-1->L+5 (13%) |  |

|    |     |       |                                                 |                                                                                       |
|----|-----|-------|-------------------------------------------------|---------------------------------------------------------------------------------------|
| 21 | 393 | 0.63  | H-6->LUMO (20%), H-4->L+2 (31%), H-3->L+1 (34%) | 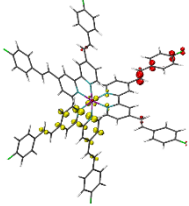   |
| 24 | 383 | 0.20  | H-6->LUMO (23%), HOMO->L+6 (68%)                |    |
| 27 | 380 | 0.16  | H-5->L+1 (74%)                                  |    |
| 28 | 380 | 0.16  | H-5->L+2 (74%)                                  |   |
| 30 | 372 | 0.015 | H-1->L+6 (84%)                                  |  |
| 31 | 372 | 0.014 | H-2->L+6 (83%)                                  |  |
| 32 | 371 | 0.037 | H-6->L+1 (71%)                                  |  |
| 33 | 371 | 0.038 | H-6->L+2 (70%)                                  |  |

|    |     |       |                                                |                                                                                       |
|----|-----|-------|------------------------------------------------|---------------------------------------------------------------------------------------|
| 34 | 365 | 0.011 | H-7->LUMO (76%), H-6->L+2 (12%)                | 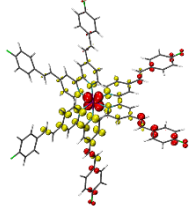   |
| 35 | 364 | 0.011 | H-8->LUMO (77%), H-6->L+1 (11%)                |    |
| 36 | 356 | 0.076 | HOMO->L+7 (93%)                                |    |
| 37 | 356 | 0.073 | HOMO->L+8 (93%)                                |   |
| 38 | 355 | 0.029 | H-8->L+1 (41%), H-7->L+2 (42%)                 |  |
| 39 | 354 | 0.037 | H-8->L+2 (42%), H-7->L+1 (47%)                 |  |
| 40 | 354 | 0.036 | H-8->L+1 (45%), H-7->L+2 (44%)                 |  |
| 42 | 347 | 0.070 | H-2->L+7 (34%), H-1->L+7 (14%), H-1->L+8 (35%) |  |

|    |     |       |                                                                |                                                                                       |
|----|-----|-------|----------------------------------------------------------------|---------------------------------------------------------------------------------------|
| 43 | 347 | 0.069 | H-2->L+7 (12%), H-2->L+8 (25%), H-1->L+7 (44%), H-1->L+8 (10%) | 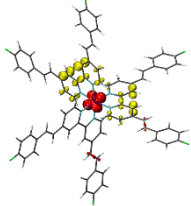   |
| 44 | 346 | 0.024 | H-2->L+8 (59%), H-1->L+7 (33%)                                 |    |
| 46 | 331 | 0.74  | H-5->L+4 (15%), H-4->L+4 (31%), H-3->L+3 (34%)                 |    |
| 47 | 331 | 0.74  | H-5->L+3 (16%), H-4->L+3 (32%), H-3->L+4 (32%)                 |   |
| 48 | 330 | 0.10  | H-5->L+3 (30%), H-3->L+5 (46%)                                 |  |
| 49 | 330 | 0.38  | H-5->L+5 (26%), H-4->L+4 (26%), H-3->L+3 (24%), H-3->L+5 (10%) |  |
| 50 | 330 | 0.026 | H-5->L+4 (37%), H-4->L+5 (55%)                                 |  |

**Supplementary Table 10.** Calculated singlet electronic transitions ( $f > 0.01$ ) of **5** in CH<sub>3</sub>CN (Isovalue = 0.04).

| No. | Wavelength (nm) | $f$   | Major contributions            | EDDM                                                                                  |
|-----|-----------------|-------|--------------------------------|---------------------------------------------------------------------------------------|
| 1   | 551             | 0.14  | HOMO->LUMO (90%)               |    |
| 4   | 534             | 0.24  | H-1->LUMO (93%)                |    |
| 5   | 533             | 0.24  | H-2->LUMO (93%)                |   |
| 6   | 527             | 0.050 | H-2->L+2 (43%), H-1->L+1 (45%) |  |
| 7   | 512             | 0.49  | H-2->L+1 (42%), H-1->L+2 (42%) |  |
| 8   | 512             | 0.50  | H-2->L+2 (43%), H-1->L+1 (41%) |  |

|    |     |       |                                                                                 |                                                                                       |
|----|-----|-------|---------------------------------------------------------------------------------|---------------------------------------------------------------------------------------|
| 10 | 442 | 0.32  | H-4->LUMO (26%), H-3->LUMO (65%)                                                | 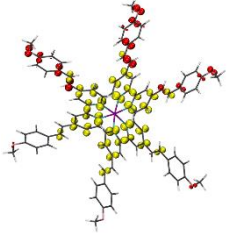   |
| 11 | 442 | 0.33  | H-4->LUMO (65%), H-3->LUMO (26%)                                                |    |
| 13 | 428 | 0.89  | H-6->LUMO (15%), H-4->L+1 (30%), H-4->L+2 (11%), H-3->L+1 (12%), H-3->L+2 (29%) |    |
| 17 | 415 | 0.23  | H-5->L+1 (80%)                                                                  |   |
| 18 | 415 | 0.23  | H-5->L+2 (81%)                                                                  |  |
| 19 | 414 | 0.064 | H-6->LUMO (73%)                                                                 |  |
| 20 | 411 | 0.18  | HOMO->L+3 (82%)                                                                 |  |



|    |     |      |                                                                |                                                                                       |
|----|-----|------|----------------------------------------------------------------|---------------------------------------------------------------------------------------|
| 21 | 411 | 0.18 | HOMO->L+4 (83%)                                                | 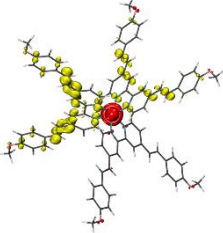   |
| 22 | 406 | 0.81 | H-2->L+3 (25%), H-1->L+3 (33%), H-1->L+4 (21%)                 |    |
| 23 | 406 | 0.46 | H-2->L+3 (17%), H-1->L+4 (14%), H-1->L+5 (43%)                 |    |
| 24 | 406 | 0.50 | H-2->L+4 (25%), H-2->L+5 (40%), H-1->L+4 (10%)                 |   |
| 26 | 404 | 0.11 | H-2->L+4 (37%), H-2->L+5 (11%), H-1->L+3 (21%), H-1->L+5 (17%) |  |
| 27 | 403 | 0.12 | H-2->L+3 (27%), H-2->L+5 (18%), H-1->L+4 (30%), H-1->L+5 (12%) |  |
| 33 | 388 | 0.16 | HOMO->L+6 (91%)                                                |  |

|    |     |       |                                                |                                                                                       |
|----|-----|-------|------------------------------------------------|---------------------------------------------------------------------------------------|
| 35 | 381 | 0.028 | H-1->L+6 (91%)                                 | 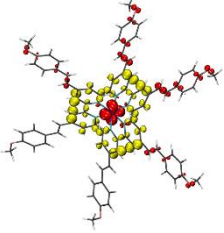   |
| 36 | 381 | 0.029 | H-2->L+6 (91%)                                 |    |
| 40 | 361 | 0.19  | HOMO->L+7 (85%)                                |    |
| 41 | 361 | 0.20  | HOMO->L+8 (86%)                                |   |
| 42 | 355 | 0.62  | H-5->L+4 (13%), H-4->L+3 (35%), H-3->L+4 (35%) |  |
| 43 | 355 | 0.62  | H-5->L+3 (14%), H-4->L+4 (33%), H-3->L+3 (36%) |  |
| 44 | 354 | 0.018 | H-3->L+5 (17%), H-2->L+8 (27%), H-1->L+7 (35%) |  |

|    |     |       |                                                                                |                                                                                       |
|----|-----|-------|--------------------------------------------------------------------------------|---------------------------------------------------------------------------------------|
| 45 | 354 | 0.026 | H-4->L+5 (16%), H-2->L+7 (32%), H-1->L+8 (32%)                                 | 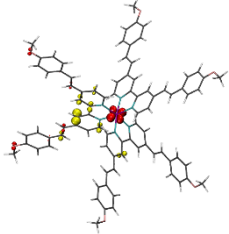   |
| 46 | 354 | 0.35  | H-5->L+5 (18%), H-4->L+4 (25%), H-3->L+3 (22%), H-2->L+8 (13%), H-1->L+7 (13%) |    |
| 48 | 354 | 0.069 | H-5->L+3 (31%), H-3->L+5 (38%), H-1->L+7 (11%)                                 |    |
| 49 | 353 | 0.061 | H-5->L+4 (32%), H-4->L+5 (37%), H-2->L+7 (13%)                                 |   |
| 50 | 353 | 0.052 | H-5->L+5 (13%), H-4->L+4 (10%), H-3->L+3 (10%), H-2->L+8 (29%), H-1->L+7 (23%) |  |

Cartesian coordinates of optimized **1**

Charge = +2, Multiplicity = 1

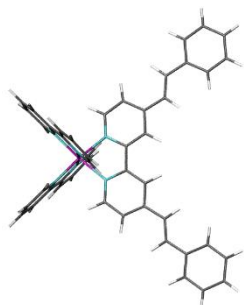

|    |           |           |           |
|----|-----------|-----------|-----------|
| C  | -5.430203 | -3.400758 | -0.420995 |
| C  | -5.110045 | -2.926177 | 0.850278  |
| C  | -4.115499 | -1.962623 | 0.973319  |
| N  | -3.444138 | -1.468921 | -0.085510 |
| C  | -3.752125 | -1.926579 | -1.333092 |
| C  | -4.743548 | -2.894391 | -1.520442 |
| C  | -2.971870 | -1.330812 | -2.433884 |
| C  | -3.125216 | -1.690207 | -3.776215 |
| C  | -2.350205 | -1.067943 | -4.750308 |
| C  | -1.433575 | -0.092613 | -4.360099 |
| C  | -1.324449 | 0.220678  | -3.010019 |
| N  | -2.070489 | -0.377428 | -2.060556 |
| Ru | -1.946127 | 0.000078  | -0.000014 |
| C  | -1.324742 | -0.220548 | 3.010065  |
| C  | -1.434046 | 0.092676  | 4.360141  |
| C  | -3.125648 | 1.690265  | 3.776121  |
| C  | -2.972117 | 1.330941  | 2.433785  |
| N  | -2.070682 | 0.377585  | 2.060539  |
| C  | -3.752218 | 1.926767  | 1.332918  |
| N  | -3.444093 | 1.469148  | 0.085364  |
| C  | -4.115293 | 1.962897  | -0.973543 |
| C  | -5.109821 | 2.926478  | -0.850604 |
| C  | -4.743631 | 2.894618  | 1.520168  |
| C  | -0.383770 | -2.660174 | 0.171590  |
| C  | 0.730886  | -3.478467 | 0.207684  |
| C  | 2.079519  | -1.509467 | 0.073025  |
| C  | 0.920412  | -0.737393 | 0.041730  |
| N  | -0.314376 | -1.313974 | 0.091040  |
| C  | 0.920460  | 0.737382  | -0.041502 |
| N  | -0.314289 | 1.314038  | -0.090925 |
| C  | -0.383591 | 2.660248  | -0.171415 |
| C  | 0.731117  | 3.478477  | -0.207341 |
| C  | 2.079617  | 1.509387  | -0.072653 |
| H  | -6.201072 | -4.151735 | -0.557404 |
| H  | -5.616788 | -3.288933 | 1.737382  |

|   |           |           |           |
|---|-----------|-----------|-----------|
| H | -3.833605 | -1.567742 | 1.941358  |
| H | -4.980907 | -3.249999 | -2.515244 |
| H | -3.841796 | -2.450084 | -4.061580 |
| H | -2.462611 | -1.341074 | -5.794141 |
| H | -0.808554 | 0.421939  | -5.081172 |
| H | -0.627850 | 0.973778  | -2.663713 |
| H | -0.628083 | -0.973614 | 2.663809  |
| H | -0.809116 | -0.421885 | 5.081286  |
| H | -3.842287 | 2.450107  | 4.061428  |
| H | -3.833286 | 1.568027  | -1.941553 |
| H | -5.616451 | 3.289291  | -1.737748 |
| H | -4.981099 | 3.250212  | 2.514948  |
| H | -1.380149 | -3.082362 | 0.213311  |
| H | 0.581683  | -4.549727 | 0.271872  |
| H | 3.049723  | -1.028969 | 0.031788  |
| H | -1.379941 | 3.082500  | -0.213217 |
| H | 0.581982  | 4.549754  | -0.271411 |
| H | 3.049792  | 1.028830  | -0.031359 |
| C | -2.350754 | 1.067970  | 4.750284  |
| C | -5.430125 | 3.401040  | 0.420649  |
| C | 2.020519  | 2.911589  | -0.157395 |
| C | 3.263022  | 3.676041  | -0.187082 |
| H | 4.166796  | 3.074768  | -0.123946 |
| C | 3.359411  | 5.020827  | -0.287409 |
| H | 2.445864  | 5.608589  | -0.357405 |
| C | 4.586940  | 5.816868  | -0.318703 |
| C | 5.878676  | 5.259370  | -0.216306 |
| C | 4.474944  | 7.214571  | -0.458032 |
| C | 7.007782  | 6.071853  | -0.253954 |
| H | 6.003152  | 4.186629  | -0.105150 |
| C | 5.606758  | 8.027675  | -0.496302 |
| H | 3.486852  | 7.661043  | -0.537653 |
| C | 6.878370  | 7.459010  | -0.394493 |
| H | 7.994220  | 5.623952  | -0.172960 |
| H | 5.495741  | 9.102806  | -0.604958 |
| H | 7.763029  | 8.088707  | -0.423212 |
| C | 2.020326  | -2.911661 | 0.157815  |
| C | 3.262778  | -3.676194 | 0.187648  |
| H | 4.166617  | -3.074939 | 0.125275  |
| C | 3.359045  | -5.021048 | 0.287178  |
| H | 2.445436  | -5.608806 | 0.356390  |
| C | 4.586521  | -5.817167 | 0.318552  |
| C | 5.878295  | -5.259741 | 0.216235  |
| C | 4.474432  | -7.214864 | 0.457857  |
| C | 7.007355  | -6.072283 | 0.254027  |
| H | 6.002829  | -4.187019 | 0.104962  |

|   |           |           |          |
|---|-----------|-----------|----------|
| C | 5.606199  | -8.028025 | 0.496285 |
| H | 3.486306  | -7.661280 | 0.537358 |
| C | 6.877853  | -7.459428 | 0.394611 |
| H | 7.993824  | -5.624444 | 0.173082 |
| H | 5.495115  | -9.103149 | 0.604947 |
| H | 7.762474  | -8.089172 | 0.423435 |
| H | -6.200985 | 4.152041  | 0.556960 |
| H | -2.463293 | 1.341026  | 5.794118 |

Cartesian coordinates of optimized 2

Charge = +2, Multiplicity = 1

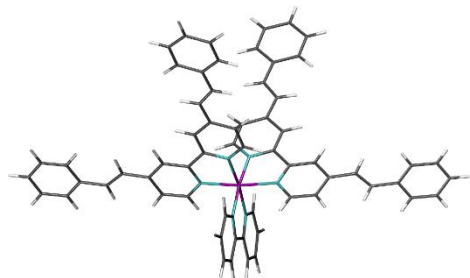

|    |           |           |           |
|----|-----------|-----------|-----------|
| C  | 0.899820  | -5.361835 | -2.952380 |
| C  | 1.029488  | -4.078679 | -3.482250 |
| C  | 0.765314  | -2.987079 | -2.662839 |
| N  | 0.385028  | -3.116599 | -1.376606 |
| C  | 0.251732  | -4.368411 | -0.851357 |
| C  | 0.507140  | -5.504681 | -1.624941 |
| C  | -0.174593 | -4.418020 | 0.559722  |
| C  | -0.408550 | -5.606384 | 1.258186  |
| C  | -0.805321 | -5.556875 | 2.591165  |
| C  | -0.960671 | -4.313179 | 3.202003  |
| C  | -0.716587 | -3.166281 | 2.455142  |
| N  | -0.332178 | -3.205384 | 1.164209  |
| Ru | 0.012919  | -1.530638 | -0.052927 |
| C  | -0.267984 | 0.719369  | -2.149462 |
| C  | 0.151028  | 1.756779  | -2.963033 |
| C  | 2.368520  | 1.391915  | -2.148447 |
| C  | 1.887878  | 0.354495  | -1.352638 |
| N  | 0.566374  | 0.018029  | -1.352218 |
| C  | 2.740630  | -0.455132 | -0.458740 |
| N  | 2.079099  | -1.391603 | 0.279456  |
| C  | 2.800255  | -2.160984 | 1.122808  |
| C  | 4.170620  | -2.046292 | 1.273381  |
| C  | 4.120539  | -0.295526 | -0.353477 |
| C  | -2.760632 | -2.120688 | -1.278040 |
| C  | -4.129827 | -2.004208 | -1.437024 |
| C  | -4.108149 | -0.354759 | 0.293172  |
| C  | -2.729187 | -0.516552 | 0.407677  |
| N  | -2.053494 | -1.399987 | -0.381424 |
| C  | -1.892328 | 0.233819  | 1.366161  |
| N  | -0.566227 | -0.083885 | 1.348070  |
| C  | 0.254311  | 0.564379  | 2.202497  |
| C  | -0.183768 | 1.527034  | 3.094121  |
| C  | -2.392152 | 1.195787  | 2.241094  |
| H  | 1.100408  | -6.238192 | -3.559501 |
| H  | 1.331392  | -3.915906 | -4.510717 |
| H  | 0.852487  | -1.973181 | -3.032728 |

|   |            |           |           |
|---|------------|-----------|-----------|
| H | 0.404056   | -6.493737 | -1.196545 |
| H | -0.285546  | -6.563777 | 0.767563  |
| H | -0.989429  | -6.474124 | 3.140373  |
| H | -1.266983  | -4.222467 | 4.238008  |
| H | -0.823654  | -2.180129 | 2.889290  |
| H | -1.308864  | 0.421169  | -2.125590 |
| H | -0.587041  | 2.263103  | -3.573848 |
| H | 3.421846   | 1.644515  | -2.127320 |
| H | 2.240732   | -2.890616 | 1.695147  |
| H | 4.668853   | -2.705600 | 1.974251  |
| H | 4.625093   | 0.450968  | -0.955291 |
| H | -2.190286  | -2.810571 | -1.887776 |
| H | -4.616510  | -2.622850 | -2.181714 |
| H | -4.623470  | 0.353894  | 0.930502  |
| H | 1.299710   | 0.284550  | 2.159922  |
| H | 0.544548   | 1.996482  | 3.744742  |
| H | -3.449726  | 1.430906  | 2.237741  |
| C | 1.509859   | 2.130672  | -2.981194 |
| C | 4.882475   | -1.091011 | 0.520232  |
| C | -1.548864  | 1.875261  | 3.137631  |
| C | -2.120747  | 2.872851  | 4.036117  |
| H | -3.192074  | 3.022825  | 3.925040  |
| C | -1.437281  | 3.587064  | 4.958275  |
| H | -0.366218  | 3.421904  | 5.060699  |
| C | -1.978443  | 4.591587  | 5.874596  |
| C | -3.336684  | 4.971775  | 5.898267  |
| C | -1.097856  | 5.213210  | 6.782123  |
| C | -3.789140  | 5.934049  | 6.795922  |
| H | -4.043346  | 4.515430  | 5.211965  |
| C | -1.552137  | 6.176953  | 7.681258  |
| H | -0.047575  | 4.932230  | 6.777361  |
| C | -2.900428  | 6.541240  | 7.691598  |
| H | -4.838848  | 6.213943  | 6.798795  |
| H | -0.854663  | 6.642297  | 8.371931  |
| H | -3.258781  | 7.291949  | 8.390165  |
| C | -4.855133  | -1.097683 | -0.637833 |
| C | -6.297592  | -0.892422 | -0.718268 |
| H | -6.690463  | -0.159283 | -0.017893 |
| C | -7.138598  | -1.523676 | -1.567842 |
| H | -6.730168  | -2.253061 | -2.265040 |
| C | -8.586881  | -1.341672 | -1.672759 |
| C | -9.320030  | -0.450229 | -0.861727 |
| C | -9.288250  | -2.096433 | -2.633958 |
| C | -10.697733 | -0.323590 | -1.011266 |
| H | -8.813008  | 0.146961  | -0.110089 |
| C | -10.668515 | -1.968858 | -2.783017 |



|   |            |           |           |
|---|------------|-----------|-----------|
| H | -8.738811  | -2.788371 | -3.267510 |
| C | -11.378977 | -1.081319 | -1.971720 |
| H | -11.245095 | 0.368197  | -0.377180 |
| H | -11.187809 | -2.561231 | -3.530993 |
| H | -12.454512 | -0.978729 | -2.084251 |
| C | 6.325510   | -0.886563 | 0.592236  |
| H | 6.706052   | -0.108733 | -0.065472 |
| C | 7.180801   | -1.568204 | 1.386829  |
| H | 6.784677   | -2.341669 | 2.042384  |
| C | 8.630135   | -1.388605 | 1.481021  |
| C | 9.346609   | -2.193252 | 2.389143  |
| C | 9.349997   | -0.452181 | 0.709756  |
| C | 10.728546  | -2.069959 | 2.525850  |
| C | 10.729401  | -0.330003 | 0.846767  |
| H | 8.831357   | 0.183181  | -0.001571 |
| C | 11.425662  | -1.137167 | 1.754734  |
| H | 11.259576  | -2.701023 | 3.232818  |
| H | 11.266362  | 0.396784  | 0.243697  |
| H | 12.502466  | -1.037879 | 1.857666  |
| H | 8.807632   | -2.920557 | 2.991285  |
| C | 2.060788   | 3.211417  | -3.792256 |
| H | 3.135428   | 3.347698  | -3.696871 |
| C | 1.353817   | 4.021041  | -4.612171 |
| H | 0.277612   | 3.877518  | -4.690297 |
| C | 1.873599   | 5.112572  | -5.436792 |
| C | 0.961937   | 5.864159  | -6.204567 |
| C | 3.240832   | 5.453091  | -5.504893 |
| C | 1.394437   | 6.917428  | -7.009051 |
| C | 3.671606   | 6.504405  | -6.308422 |
| H | 3.972049   | 4.893493  | -4.929707 |
| C | 2.751796   | 7.241876  | -7.063933 |
| H | 0.673047   | 7.483153  | -7.591807 |
| H | 4.728827   | 6.751288  | -6.348128 |
| H | 3.093324   | 8.061394  | -7.689804 |
| H | -0.095579  | 5.614958  | -6.164446 |

### Cartesian coordinates of optimized **3**

Charge = +2, Multiplicity = 1

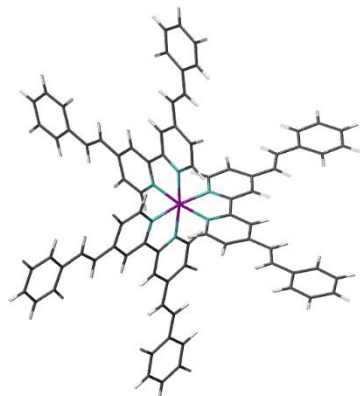

|    |           |           |           |
|----|-----------|-----------|-----------|
| C  | 2.582780  | -2.216714 | 2.790143  |
| C  | 1.493083  | -1.662727 | 2.142715  |
| N  | 1.600960  | -0.860115 | 1.062187  |
| C  | 2.849977  | -0.588317 | 0.587003  |
| C  | 3.985491  | -1.117638 | 1.196549  |
| C  | 2.890737  | 0.297099  | -0.594486 |
| C  | 4.070112  | 0.711127  | -1.209870 |
| C  | 4.049124  | 1.556980  | -2.332566 |
| C  | 2.776192  | 1.952704  | -2.790485 |
| C  | 1.639971  | 1.508745  | -2.138237 |
| N  | 1.672675  | 0.694780  | -1.061176 |
| Ru | 0.007825  | -0.003845 | 0.002438  |
| C  | -2.181081 | -0.434092 | 2.138906  |
| C  | -3.212907 | -1.089817 | 2.786126  |
| C  | -2.959210 | -2.871416 | 1.212547  |
| C  | -1.925486 | -2.163614 | 0.602984  |
| N  | -1.535281 | -0.942235 | 1.067415  |
| C  | -1.173111 | -2.657111 | -0.568369 |
| N  | -0.216861 | -1.807529 | -1.041178 |
| C  | 0.508392  | -2.199446 | -2.110777 |
| C  | 0.326024  | -3.412556 | -2.750021 |
| C  | -1.401829 | -3.892981 | -1.169491 |
| C  | 0.721353  | 2.132564  | 2.116217  |
| C  | 0.660842  | 3.358991  | 2.753253  |
| C  | -1.011498 | 4.006185  | 1.172384  |
| C  | -0.907349 | 2.752399  | 0.573932  |
| N  | -0.039521 | 1.813049  | 1.047298  |
| C  | -1.706193 | 2.333498  | -0.595511 |
| N  | -1.438679 | 1.079321  | -1.059314 |
| C  | -2.131904 | 0.637238  | -2.130579 |
| C  | -3.093575 | 1.391739  | -2.778404 |

|   |           |           |           |
|---|-----------|-----------|-----------|
| C | -2.666151 | 3.138909  | -1.204172 |
| H | 2.403698  | -2.849643 | 3.651241  |
| H | 0.485761  | -1.854072 | 2.491491  |
| H | 4.967687  | -0.887469 | 0.800958  |
| H | 5.026013  | 0.381556  | -0.820614 |
| H | 2.656903  | 2.602550  | -3.649384 |
| H | 0.655230  | 1.802456  | -2.480535 |
| H | -1.841494 | 0.535967  | 2.480618  |
| H | -3.674871 | -0.607958 | 3.639711  |
| H | -3.252984 | -3.839429 | 0.824196  |
| H | 1.257682  | -1.498561 | -2.457606 |
| H | 0.952744  | -3.645289 | -3.602824 |
| H | -2.166234 | -4.551752 | -0.775026 |
| H | 1.397232  | 1.361214  | 2.464130  |
| H | 1.308700  | 3.530246  | 3.604820  |
| H | -1.706111 | 4.737617  | 0.776662  |
| H | -1.890710 | -0.362004 | -2.471716 |
| H | -3.600506 | 0.957969  | -3.632288 |
| H | -2.863854 | 4.130428  | -0.814836 |
| C | -3.639184 | -2.352898 | 2.328524  |
| C | -6.540659 | -3.515676 | 4.627681  |
| C | -7.187117 | -2.954839 | 5.747080  |
| C | -6.977072 | -4.776407 | 4.169380  |
| C | -8.229329 | -3.623910 | 6.387250  |
| H | -6.863675 | -1.983721 | 6.113705  |
| C | -8.017451 | -5.443463 | 4.808996  |
| H | -6.502719 | -5.238726 | 3.309210  |
| C | -8.648795 | -4.871612 | 5.920343  |
| H | -8.712694 | -3.171755 | 7.248636  |
| H | -8.339514 | -6.413595 | 4.441025  |
| H | -9.460532 | -5.396490 | 6.415907  |
| C | -4.717130 | -3.130866 | 2.930500  |
| C | -5.453952 | -2.761137 | 4.001864  |
| H | -4.913624 | -4.084070 | 2.445626  |
| H | -5.244970 | -1.804395 | 4.477139  |
| C | -0.655808 | -4.310779 | -2.285409 |
| C | -0.933914 | -5.614021 | -2.880236 |
| H | -1.722400 | -6.178263 | -2.387934 |
| C | -0.305475 | -6.141007 | -3.954898 |
| H | 0.480165  | -5.563176 | -4.438430 |
| C | -0.560043 | -7.441713 | -4.575531 |
| C | -1.531524 | -8.350828 | -4.106770 |
| C | 0.204430  | -7.807204 | -5.701348 |
| C | -1.725858 | -9.573096 | -4.743028 |
| H | -2.138276 | -8.103106 | -3.241222 |
| C | 0.009016  | -9.031955 | -6.338086 |

|   |           |            |           |
|---|-----------|------------|-----------|
| H | 0.957909  | -7.118603  | -6.075747 |
| C | -0.957657 | -9.920085  | -5.861160 |
| H | -2.478950 | -10.260065 | -4.367295 |
| H | 0.610339  | -9.291926  | -7.204616 |
| H | -1.113387 | -10.875424 | -6.354169 |
| C | -3.393448 | 2.690626   | -2.320587 |
| C | -4.388142 | 3.572436   | -2.922754 |
| H | -4.491091 | 4.539241   | -2.435718 |
| C | -5.153496 | 3.280602   | -3.998133 |
| H | -5.037337 | 2.309768   | -4.476572 |
| C | -6.156957 | 4.141228   | -4.625932 |
| C | -6.475113 | 5.433884   | -4.159254 |
| C | -6.842660 | 3.654934   | -5.756746 |
| C | -7.439862 | 6.203470   | -4.802279 |
| H | -5.967863 | 5.840533   | -3.289727 |
| C | -7.808888 | 4.426766   | -6.400395 |
| H | -6.609840 | 2.660592   | -6.129815 |
| C | -8.111361 | 5.704845   | -5.925322 |
| H | -7.671208 | 7.196743   | -4.427908 |
| H | -8.324328 | 4.030863   | -7.270820 |
| H | -8.863646 | 6.309678   | -6.423544 |
| C | -0.226921 | 4.349616   | 2.287235  |
| C | -0.373340 | 5.675357   | 2.879247  |
| H | -1.095727 | 6.317013   | 2.380478  |
| C | 0.297170  | 6.136144   | 3.958828  |
| H | 1.015024  | 5.481200   | 4.449413  |
| C | 0.173000  | 7.457380   | 4.575880  |
| C | -0.699194 | 8.459134   | 4.100777  |
| C | 0.965840  | 7.746420   | 5.704293  |
| C | -0.770267 | 9.696928   | 4.732656  |
| H | -1.325347 | 8.271597   | 3.233903  |
| C | 0.893870  | 8.986784   | 6.336736  |
| H | 1.643589  | 6.985712   | 6.083796  |
| C | 0.024967  | 9.967444   | 5.852987  |
| H | -1.448035 | 10.455796  | 4.351850  |
| H | 1.514967  | 9.186840   | 7.205233  |
| H | -0.034354 | 10.935332  | 6.342547  |
| C | 5.311491  | 1.964423   | -2.940799 |
| H | 6.198169  | 1.554438   | -2.463183 |
| C | 5.445093  | 2.782507   | -4.008681 |
| H | 4.548519  | 3.187017   | -4.474969 |
| C | 6.693735  | 3.210391   | -4.640839 |
| C | 6.620090  | 4.074752   | -5.751219 |
| C | 7.969541  | 2.803382   | -4.197447 |
| C | 7.773517  | 4.517999   | -6.396816 |
| C | 9.120245  | 3.246196   | -4.842617 |

|   |           |           |           |
|---|-----------|-----------|-----------|
| H | 8.064450  | 2.137969  | -3.344854 |
| C | 9.028852  | 4.105200  | -5.944667 |
| H | 7.691936  | 5.184172  | -7.250993 |
| H | 10.093914 | 2.921633  | -4.486377 |
| H | 9.930217  | 4.447991  | -6.444683 |
| H | 5.644772  | 4.398401  | -6.106370 |
| C | 3.886229  | -1.952576 | 2.323368  |
| C | 5.104967  | -2.482268 | 2.926559  |
| H | 6.024283  | -2.179745 | 2.430955  |
| C | 5.163571  | -3.286956 | 4.011270  |
| H | 4.234948  | -3.580133 | 4.497756  |
| C | 6.366912  | -3.834923 | 4.638809  |
| C | 6.214976  | -4.661348 | 5.769969  |
| C | 7.673248  | -3.580380 | 4.171153  |
| C | 7.321927  | -5.214488 | 6.412123  |
| C | 8.777559  | -4.132857 | 4.812869  |
| H | 7.828720  | -2.948184 | 3.302351  |
| C | 8.608347  | -4.952218 | 5.935685  |
| H | 7.179957  | -5.848823 | 7.282490  |
| H | 9.775765  | -3.925242 | 4.437683  |
| H | 9.473765  | -5.381014 | 6.432850  |
| H | 5.215316  | -4.868152 | 6.144083  |

Cartesian coordinates of optimized 4

Charge = +2, Multiplicity = 1

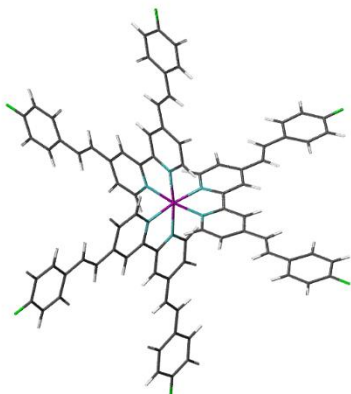

|    |           |           |           |
|----|-----------|-----------|-----------|
| C  | 2.598103  | 2.195863  | -2.782288 |
| C  | 1.503818  | 1.653047  | -2.133181 |
| N  | 1.605230  | 0.844509  | -1.056354 |
| C  | 2.852368  | 0.555272  | -0.586634 |
| C  | 3.992274  | 1.072498  | -1.198212 |
| C  | 2.886411  | -0.333368 | 0.592676  |
| C  | 4.062631  | -0.762838 | 1.203416  |
| C  | 4.034904  | -1.607513 | 2.327002  |
| C  | 2.758609  | -1.986848 | 2.789528  |
| C  | 1.625907  | -1.528663 | 2.141135  |
| N  | 1.664981  | -0.715746 | 1.063532  |
| Ru | 0.005229  | 0.001260  | 0.003029  |
| C  | -2.178412 | 0.457246  | -2.132718 |
| C  | -3.201483 | 1.125582  | -2.780892 |
| C  | -2.930994 | 2.901161  | -1.203361 |
| C  | -1.905675 | 2.181366  | -0.593813 |
| N  | -1.528431 | 0.956437  | -1.059481 |
| C  | -1.148712 | 2.665584  | 0.578448  |
| N  | -0.202096 | 1.804973  | 1.050792  |
| C  | 0.526692  | 2.187804  | 2.121287  |
| C  | 0.357943  | 3.402588  | 2.761039  |
| C  | -1.363950 | 3.903456  | 1.180304  |
| C  | 0.696570  | -2.136084 | -2.116668 |
| C  | 0.620849  | -3.358450 | -2.759678 |
| C  | -1.058929 | -3.992824 | -1.181535 |
| C  | -0.938507 | -2.743767 | -0.576293 |
| N  | -0.060096 | -1.812346 | -1.046061 |
| C  | -1.730727 | -2.321519 | 0.596644  |
| N  | -1.451294 | -1.070791 | 1.062840  |
| C  | -2.139591 | -0.624385 | 2.135467  |
| C  | -3.106954 | -1.371581 | 2.783022  |
| C  | -2.695412 | -3.120676 | 1.206279  |

|   |           |           |           |
|---|-----------|-----------|-----------|
| H | 2.423891  | 2.834114  | -3.640505 |
| H | 0.497819  | 1.858810  | -2.477708 |
| H | 4.972724  | 0.828193  | -0.806999 |
| H | 5.021447  | -0.445628 | 0.810970  |
| H | 2.633735  | -2.635800 | 3.648303  |
| H | 0.638745  | -1.809523 | 2.487022  |
| H | -1.849521 | -0.516299 | -2.474932 |
| H | -3.666992 | 0.650150  | -3.636174 |
| H | -3.214669 | 3.871478  | -0.813557 |
| H | 1.267268  | 1.478008  | 2.468748  |
| H | 0.986871  | 3.627435  | 3.614354  |
| H | -2.120641 | 4.571189  | 0.785962  |
| H | 1.381615  | -1.371370 | -2.461447 |
| H | 1.265371  | -3.532678 | -3.613189 |
| H | -1.763291 | -4.716794 | -0.789393 |
| H | -1.888862 | 0.371951  | 2.478282  |
| H | -3.608990 | -0.934529 | 3.638181  |
| H | -2.900585 | -4.110711 | 0.816598  |
| C | -3.614512 | 2.392668  | -2.321785 |
| C | -6.491962 | 3.593934  | -4.628999 |
| C | -7.135641 | 3.047624  | -5.757720 |
| C | -6.921631 | 4.855997  | -4.166059 |
| C | -8.166116 | 3.723226  | -6.406989 |
| H | -6.820983 | 2.076995  | -6.131348 |
| C | -7.948748 | 5.542961  | -4.802772 |
| H | -6.452596 | 5.310432  | -3.299454 |
| C | -8.555453 | 4.963720  | -5.915642 |
| H | -8.662232 | 3.304253  | -7.275881 |
| H | -8.283736 | 6.513211  | -4.451646 |
| C | -4.681444 | 3.184600  | -2.924501 |
| C | -5.417611 | 2.826564  | -4.000447 |
| H | -4.868718 | 4.138391  | -2.436959 |
| H | -5.216480 | 1.869655  | -4.478362 |
| C | -0.613195 | 4.312440  | 2.296451  |
| C | -0.876069 | 5.618651  | 2.891005  |
| H | -1.658905 | 6.191079  | 2.399152  |
| C | -0.239595 | 6.139407  | 3.964118  |
| H | 0.541388  | 5.554066  | 4.445787  |
| C | -0.478068 | 7.441948  | 4.584339  |
| C | -1.447083 | 8.358549  | 4.123309  |
| C | 0.298980  | 7.805405  | 5.702733  |
| C | -1.632142 | 9.584691  | 4.751461  |
| H | -2.066006 | 8.116244  | 3.265572  |
| C | 0.125962  | 9.030041  | 6.343211  |
| H | 1.050963  | 7.114836  | 6.074634  |
| C | -0.840436 | 9.900924  | 5.853858  |

|   |           |            |           |
|---|-----------|------------|-----------|
| H | -2.375376 | 10.293445  | 4.401965  |
| H | 0.723197  | 9.311248   | 7.203959  |
| C | -3.417581 | -2.667746  | 2.324403  |
| C | -4.418123 | -3.541556  | 2.927873  |
| H | -4.526826 | -4.508998  | 2.443470  |
| C | -5.183138 | -3.240313  | 4.001082  |
| H | -5.061664 | -2.268150  | 4.474977  |
| C | -6.192887 | -4.089749  | 4.631118  |
| C | -6.513393 | -5.386768  | 4.176541  |
| C | -6.885293 | -3.590532  | 5.752790  |
| C | -7.482685 | -6.152236  | 4.814352  |
| H | -6.003433 | -5.807125  | 3.315883  |
| C | -7.859064 | -4.344780  | 6.402979  |
| H | -6.654604 | -2.594198  | 6.119991  |
| C | -8.141106 | -5.617158  | 5.919917  |
| H | -7.733525 | -7.149830  | 4.469713  |
| H | -8.392653 | -3.962036  | 7.266378  |
| C | -0.278814 | -4.340585  | -2.298329 |
| C | -0.441151 | -5.661221  | -2.897003 |
| H | -1.177949 | -6.293587  | -2.407440 |
| C | 0.233544  | -6.128168  | -3.971553 |
| H | 0.967416  | -5.482986  | -4.450875 |
| C | 0.095869  | -7.443190  | -4.595936 |
| C | -0.800008 | -8.432723  | -4.137850 |
| C | 0.898547  | -7.742675  | -5.715223 |
| C | -0.890469 | -9.667602  | -4.769623 |
| H | -1.435471 | -8.240983  | -3.279414 |
| C | 0.819949  | -8.975075  | -6.359341 |
| H | 1.595348  | -6.995453  | -6.085077 |
| C | -0.076808 | -9.918954  | -5.872738 |
| H | -1.577171 | -10.432277 | -4.422376 |
| H | 1.436956  | -9.207074  | -7.220811 |
| C | 5.293891  | -2.030000  | 2.931312  |
| H | 6.184165  | -1.642036  | 2.442092  |
| C | 5.419546  | -2.835310  | 4.009974  |
| H | 4.518821  | -3.215228  | 4.488436  |
| C | 6.662693  | -3.277868  | 4.639996  |
| C | 6.581748  | -4.124111  | 5.764345  |
| C | 7.944023  | -2.903087  | 4.182423  |
| C | 7.724750  | -4.584162  | 6.413783  |
| C | 9.094432  | -3.353612  | 4.819481  |
| H | 8.049169  | -2.252818  | 3.320129  |
| C | 8.965362  | -4.188936  | 5.927477  |
| H | 7.664090  | -5.235476  | 7.279089  |
| H | 10.082129 | -3.069095  | 4.472478  |
| H | 5.605376  | -4.425295  | 6.134043  |



|   |           |            |           |
|---|-----------|------------|-----------|
| C | 3.899851  | 1.913205   | -2.321357 |
| C | 5.123052  | 2.429010   | -2.926781 |
| H | 6.040321  | 2.109035   | -2.438261 |
| C | 5.187540  | 3.240649   | -4.006094 |
| H | 4.260832  | 3.551329   | -4.484873 |
| C | 6.393976  | 3.774237   | -4.636986 |
| C | 6.249897  | 4.607118   | -5.764969 |
| C | 7.699679  | 3.500143   | -4.176916 |
| C | 7.355151  | 5.150032   | -6.415762 |
| C | 8.813027  | 4.034279   | -4.815196 |
| H | 7.853166  | 2.863735   | -3.311516 |
| C | 8.621787  | 4.852486   | -5.926973 |
| H | 7.245953  | 5.791080   | -7.283970 |
| H | 9.819198  | 3.827439   | -4.466316 |
| H | 5.253742  | 4.831443   | -6.136483 |
| F | -0.164490 | -11.117885 | -6.486284 |
| F | -9.082246 | -6.360236  | 6.539308  |
| F | -9.552819 | 5.630511   | -6.533874 |
| F | -1.019976 | 11.091365  | 6.463930  |
| F | 9.702636  | 5.371212   | -6.546840 |
| F | 10.082166 | -4.626523  | 6.546213  |

Cartesian coordinates of optimized **5**

Charge = +2, Multiplicity = 1

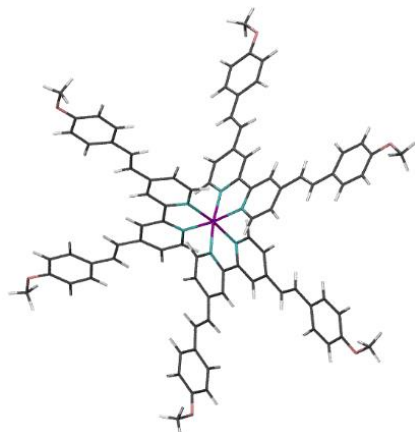

|    |           |           |           |
|----|-----------|-----------|-----------|
| C  | -2.292554 | 2.511109  | 2.782722  |
| C  | -1.277737 | 1.830116  | 2.135529  |
| N  | -1.480703 | 1.040402  | 1.058727  |
| C  | -2.754822 | 0.915876  | 0.587769  |
| C  | -3.818032 | 1.578480  | 1.196287  |
| C  | -2.903111 | 0.036197  | -0.589867 |
| C  | -4.124535 | -0.238885 | -1.199968 |
| C  | -4.208486 | -1.083813 | -2.321897 |
| C  | -2.990266 | -1.626966 | -2.781106 |
| C  | -1.808358 | -1.317827 | -2.133099 |
| N  | -1.740814 | -0.502928 | -1.057991 |
| Ru | -0.001941 | -0.002788 | 0.000631  |
| C  | 2.224966  | 0.178311  | 2.134403  |
| C  | 3.321931  | 0.715265  | 2.783031  |
| C  | 3.274392  | 2.509089  | 1.203950  |
| C  | 2.169350  | 1.920722  | 0.593615  |
| N  | 1.641649  | 0.752606  | 1.060024  |
| C  | 1.480735  | 2.492838  | -0.581655 |
| N  | 0.432743  | 1.757096  | -1.051799 |
| C  | -0.239391 | 2.226186  | -2.125424 |
| C  | 0.083497  | 3.406317  | -2.770011 |
| C  | 1.852660  | 3.690265  | -1.187938 |
| C  | -0.958730 | -2.031795 | 2.124919  |
| C  | -1.042308 | -3.253223 | 2.767927  |
| C  | 0.540230  | -4.100114 | 1.189265  |
| C  | 0.582383  | -2.846503 | 0.583863  |
| N  | -0.167669 | -1.808303 | 1.053188  |
| C  | 1.422202  | -2.530716 | -0.589898 |
| N  | 1.304640  | -1.254661 | -1.057381 |
| C  | 2.045379  | -0.902324 | -2.130505 |
| C  | 2.909224  | -1.767511 | -2.776657 |
| C  | 2.276673  | -3.447183 | -1.198017 |

|   |           |           |           |
|---|-----------|-----------|-----------|
| H | -2.037637 | 3.121650  | 3.641052  |
| H | -0.253858 | 1.903733  | 2.481297  |
| H | -4.821064 | 1.464643  | 0.802403  |
| H | -5.034188 | 0.200910  | -0.808486 |
| H | -2.950455 | -2.289693 | -3.637605 |
| H | -0.865824 | -1.726314 | -2.476855 |
| H | 1.777916  | -0.746928 | 2.477077  |
| H | 3.723853  | 0.186612  | 3.639424  |
| H | 3.675606  | 3.436768  | 0.813185  |
| H | -1.064211 | 1.614995  | -2.471124 |
| H | -0.510217 | 3.704977  | -3.626062 |
| H | 2.688207  | 4.257027  | -0.794339 |
| H | -1.537913 | -1.183974 | 2.469995  |
| H | -1.703268 | -3.342067 | 3.622091  |
| H | 1.145331  | -4.909161 | 0.797391  |
| H | 1.924350  | 0.117752  | -2.474123 |
| H | 3.463421  | -1.399051 | -3.631928 |
| H | 2.353244  | -4.454905 | -0.807084 |
| C | 3.890319  | 1.922299  | 2.324736  |
| C | 6.887579  | 2.755766  | 4.636257  |
| C | 7.470777  | 2.133406  | 5.755108  |
| C | 7.467080  | 3.966345  | 4.189387  |
| C | 8.575948  | 2.672762  | 6.411276  |
| H | 7.047980  | 1.201487  | 6.122329  |
| C | 8.564076  | 4.514323  | 4.829863  |
| H | 7.053574  | 4.485423  | 3.330229  |
| C | 9.131702  | 3.873799  | 5.949183  |
| H | 8.990370  | 2.156953  | 7.269290  |
| H | 9.006426  | 5.443720  | 4.484723  |
| C | 5.044051  | 2.576107  | 2.927765  |
| C | 5.732203  | 2.129676  | 4.005397  |
| H | 5.348134  | 3.500241  | 2.441736  |
| H | 5.414595  | 1.202563  | 4.479867  |
| C | 1.162484  | 4.188925  | -2.308052 |
| C | 1.590254  | 5.446275  | -2.906550 |
| H | 2.441721  | 5.915078  | -2.418804 |
| C | 1.023317  | 6.043247  | -3.981834 |
| H | 0.171158  | 5.560462  | -4.457321 |
| C | 1.422997  | 7.297091  | -4.608617 |
| C | 2.505679  | 8.089688  | -4.160682 |
| C | 0.701045  | 7.758638  | -5.724455 |
| C | 2.838984  | 9.271856  | -4.797314 |
| H | 3.094262  | 7.776561  | -3.303835 |
| C | 1.024294  | 8.947352  | -6.376619 |
| H | -0.136631 | 7.171194  | -6.092407 |
| C | 2.101882  | 9.714906  | -5.913432 |

|   |            |            |           |
|---|------------|------------|-----------|
| H | 3.670571   | 9.878030   | -4.451490 |
| H | 0.438917   | 9.262162   | -7.232325 |
| C | 3.052457   | -3.093569  | -2.317268 |
| C | 3.931662   | -4.087707  | -2.917925 |
| H | 3.914695   | -5.061394  | -2.433741 |
| C | 4.733238   | -3.887852  | -3.991068 |
| H | 4.737401   | -2.906753  | -4.463170 |
| C | 5.625358   | -4.854384  | -4.619204 |
| C | 5.779969   | -6.187401  | -4.171812 |
| C | 6.383113   | -4.454060  | -5.734959 |
| C | 6.643198   | -7.060822  | -4.808874 |
| H | 5.217476   | -6.544437  | -3.314644 |
| C | 7.257041   | -5.321904  | -6.387531 |
| H | 6.286075   | -3.435401  | -6.102432 |
| C | 7.392263   | -6.638161  | -5.924948 |
| H | 6.759884   | -8.083411  | -4.463512 |
| H | 7.820068   | -4.968040  | -7.242959 |
| C | -0.278410  | -4.345837  | 2.306926  |
| C | -0.289154  | -5.674536  | 2.904030  |
| H | 0.364007   | -6.395920  | 2.418590  |
| C | -1.026041  | -6.053968  | 3.975078  |
| H | -1.674289  | -5.318719  | 4.449185  |
| C | -1.063894  | -7.371102  | 4.598496  |
| C | -0.306172  | -8.476655  | 4.146121  |
| C | -1.896835  | -7.570699  | 5.714588  |
| C | -0.383057  | -9.704575  | 4.778745  |
| H | 0.351183   | -8.373881  | 3.288288  |
| C | -1.985290  | -8.801434  | 6.362851  |
| H | -2.491904  | -6.740011  | 6.085934  |
| C | -1.223811  | -9.881490  | 5.895521  |
| H | 0.199821   | -10.551126 | 4.429192  |
| H | -2.640998  | -8.907026  | 7.218898  |
| C | -5.509577  | -1.340360  | -2.924832 |
| H | -6.343002  | -0.840831  | -2.436374 |
| C | -5.739576  | -2.123491  | -4.005544 |
| H | -4.893479  | -2.615058  | -4.483050 |
| C | -7.023701  | -2.402382  | -4.636456 |
| C | -7.058604  | -3.246929  | -5.761088 |
| C | -8.253752  | -1.870114  | -4.184002 |
| C | -8.248077  | -3.558320  | -6.417542 |
| C | -9.442680  | -2.169716  | -4.824778 |
| H | -8.279847  | -1.213397  | -3.319937 |
| C | -9.453852  | -3.017709  | -5.950010 |
| H | -8.225100  | -4.213641  | -7.280035 |
| H | -10.385037 | -1.759403  | -4.475238 |
| H | -6.129354  | -3.671826  | -6.132639 |

|   |            |            |           |
|---|------------|------------|-----------|
| C | -3.620709  | 2.401825   | 2.320044  |
| C | -4.765570  | 3.072456   | 2.921386  |
| H | -5.716473  | 2.874750   | 2.432071  |
| C | -4.725920  | 3.889034   | 4.001034  |
| H | -3.765345  | 4.076332   | 4.478179  |
| C | -5.847284  | 4.575705   | 4.630165  |
| C | -5.602270  | 5.391888   | 5.749594  |
| C | -7.184499  | 4.472029   | 4.180545  |
| C | -6.623191  | 6.079905   | 6.403165  |
| C | -8.208805  | 5.148487   | 4.818579  |
| H | -7.425512  | 3.853837   | 3.321252  |
| C | -7.940095  | 5.961070   | 5.937888  |
| H | -6.385656  | 6.697045   | 7.261475  |
| H | -9.234205  | 5.067030   | 4.471472  |
| H | -4.584603  | 5.491210   | 6.119161  |
| O | 10.203589  | 4.495736   | 6.502434  |
| O | 2.512454   | 10.886013  | -6.462713 |
| O | -9.015524  | 6.579460   | 6.488109  |
| O | -10.671840 | -3.246063  | -6.503348 |
| O | -1.224350  | -11.124022 | 6.441351  |
| O | 8.207868   | -7.573060  | -6.474833 |
| C | -10.752071 | -4.094822  | -7.648656 |
| H | -10.396533 | -5.105955  | -7.419100 |
| H | -10.176230 | -3.685652  | -8.486825 |
| C | -2.052656  | -11.368850 | 7.578223  |
| H | -3.110588  | -11.208472 | 7.340485  |
| H | -1.766293  | -10.730975 | 8.422402  |
| C | -8.811844  | 7.417679   | 7.625803  |
| H | -8.144729  | 8.254283   | 7.388061  |
| H | -8.401034  | 6.849798   | 8.468567  |
| C | 1.808137   | 11.390993  | -7.597352 |
| H | 0.757575   | 11.589943  | -7.356084 |
| H | 1.864338   | 10.694243  | -8.441676 |
| C | 10.824766  | 3.900209   | 7.641718  |
| H | 11.217148  | 2.904525   | 7.404832  |
| H | 10.125255  | 3.827656   | 8.482523  |
| C | 8.993212   | -7.209385  | -7.610349 |
| H | 9.686118   | -6.394975  | -7.369285 |
| H | 8.358335   | -6.912530  | -8.453148 |
| H | 2.304229   | 12.325296  | -7.862470 |
| H | 11.648994  | 4.562135   | 7.909731  |
| H | 9.559363   | -8.102355  | -7.877533 |
| H | -1.893069  | -12.415046 | 7.841527  |
| H | -11.808594 | -4.132289  | -7.916397 |
| H | -9.797411  | 7.801748   | 7.891247  |

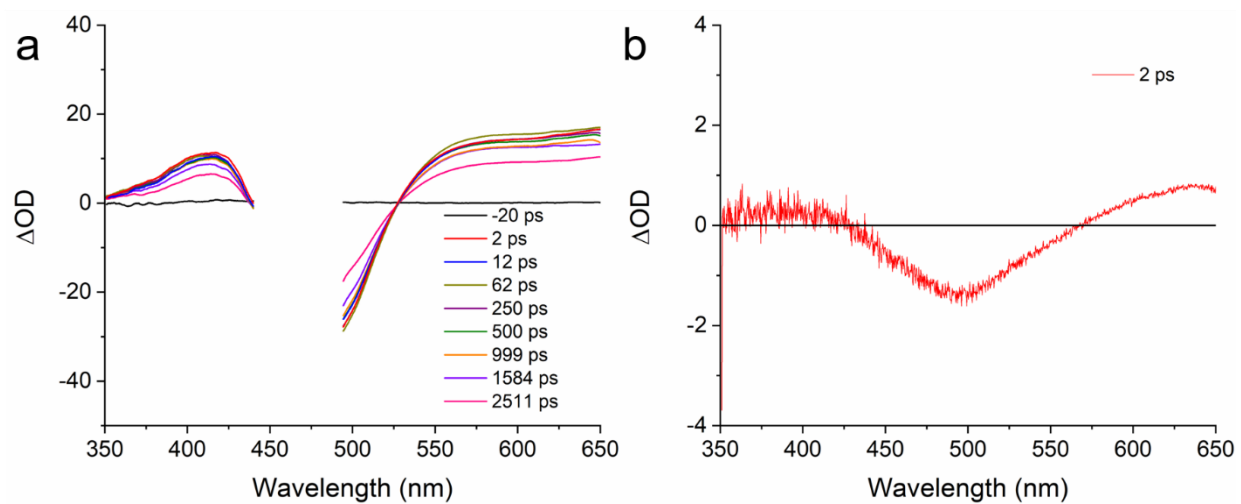

**Supplementary Figure 20.** Transient absorption spectra of **2** under irradiation of (a) 480 nm and (b) 800 nm.

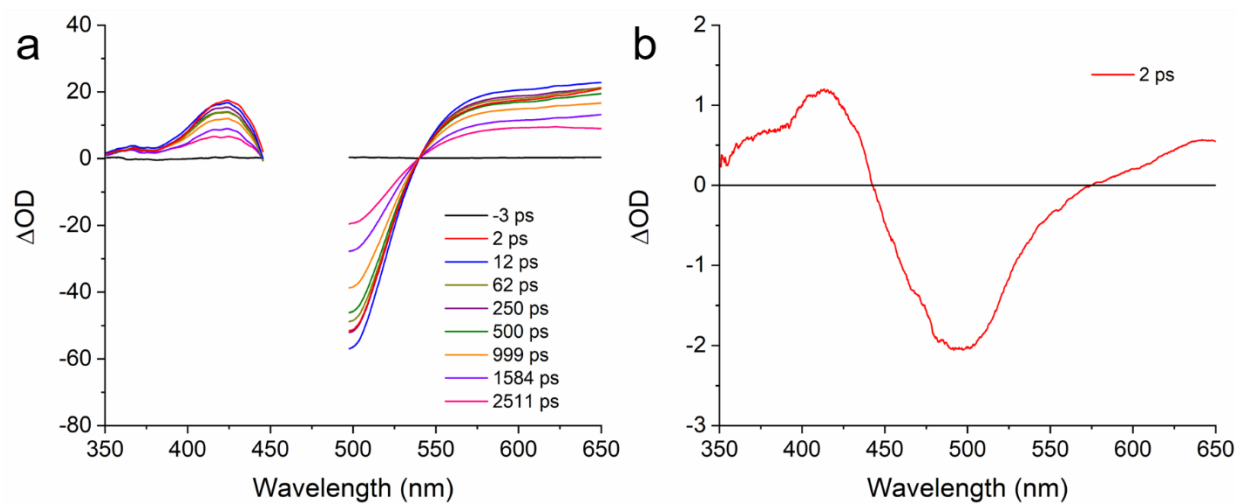

**Supplementary Figure 21.** Transient absorption spectra of **3** under irradiation of (a) 480 nm and (b) 800 nm.

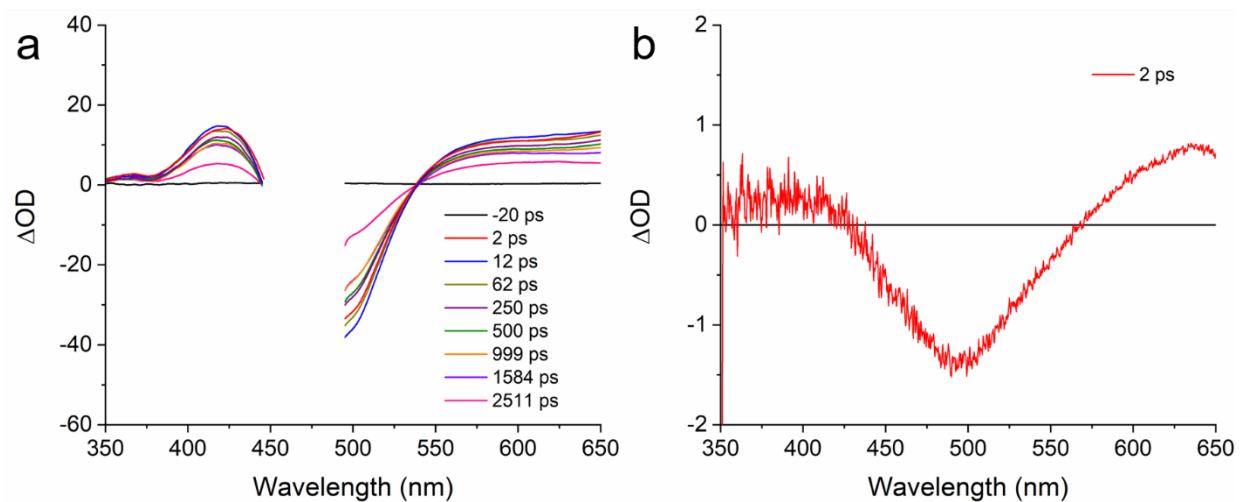

**Supplementary Figure 22.** Transient absorption spectra of **4** under irradiation of (a) 480 nm and (b) 800 nm.



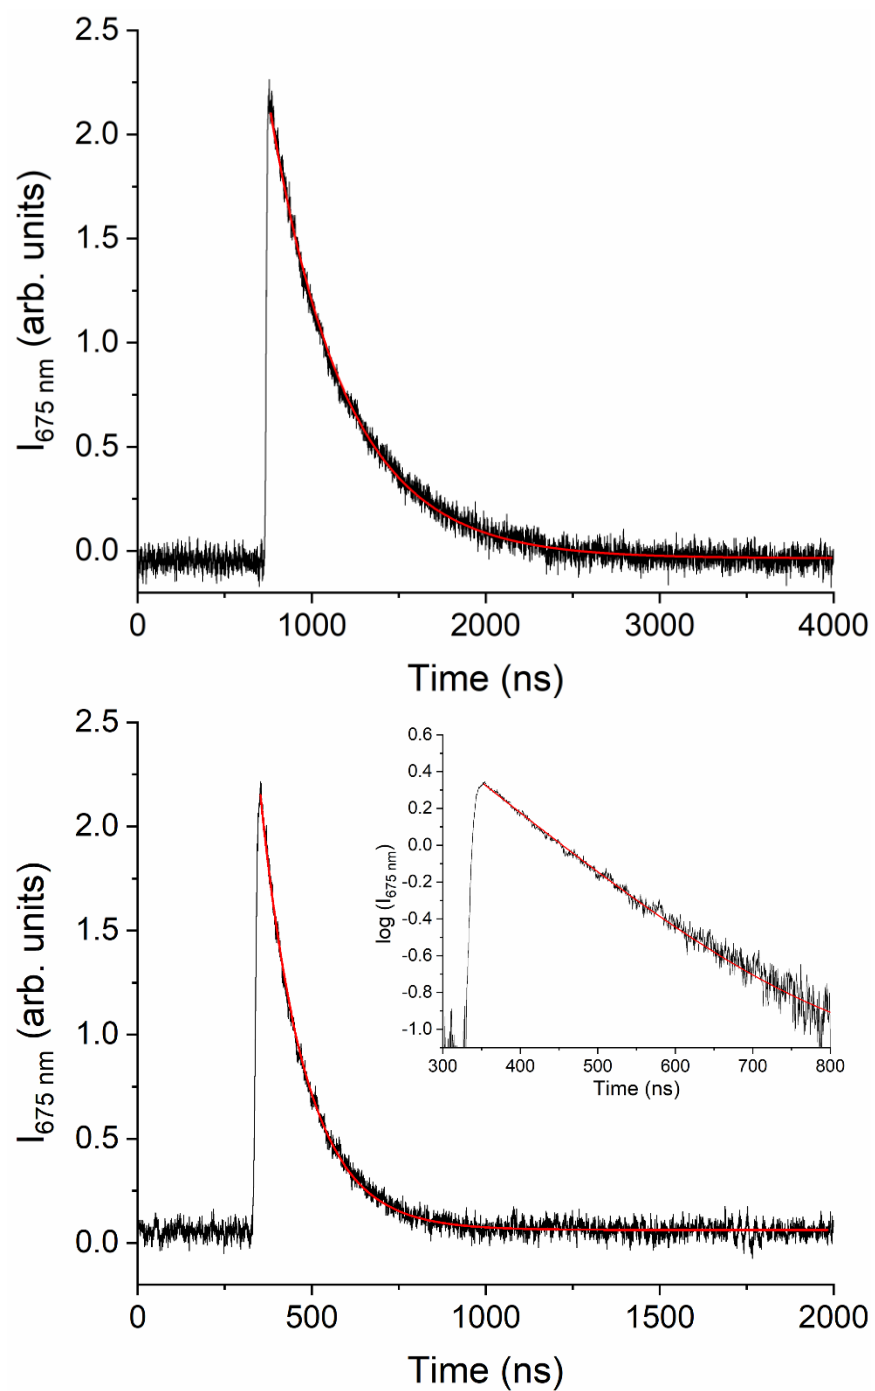

**Supplementary Figure 23.** Emission decay of **3** in deaerated (top) and aerated (bottom) CH<sub>3</sub>CN. Insets show the intensity plotted on a log scale (excited at 480 nm and decay trace taken at 670 nm).

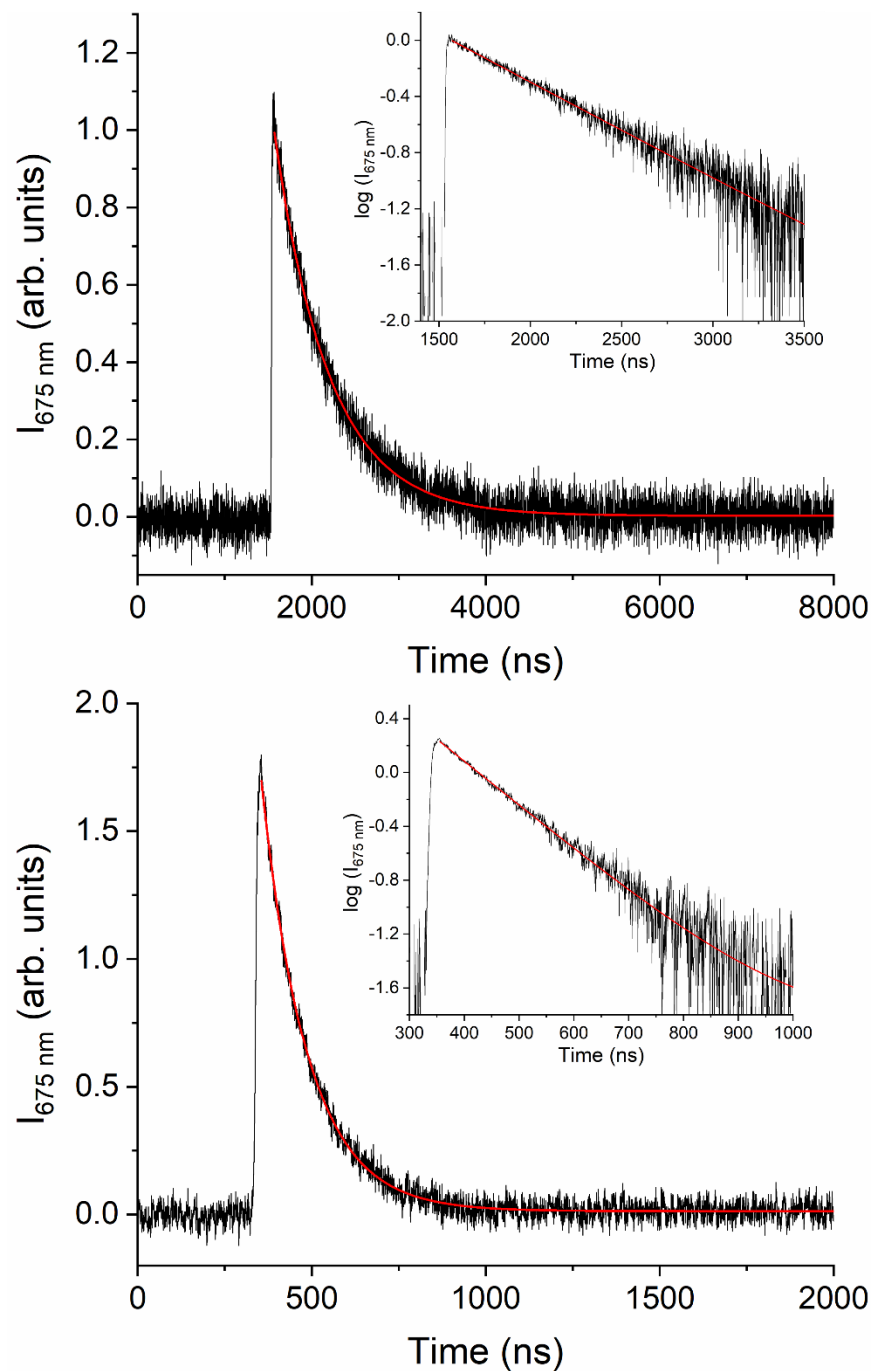

**Supplementary Figure 24.** Emission decay of **4** in deaerated (top) and aerated (bottom) CH<sub>3</sub>CN. Insets show the intensity plotted on a log scale (excited at 480 nm and decay trace taken at 670 nm).

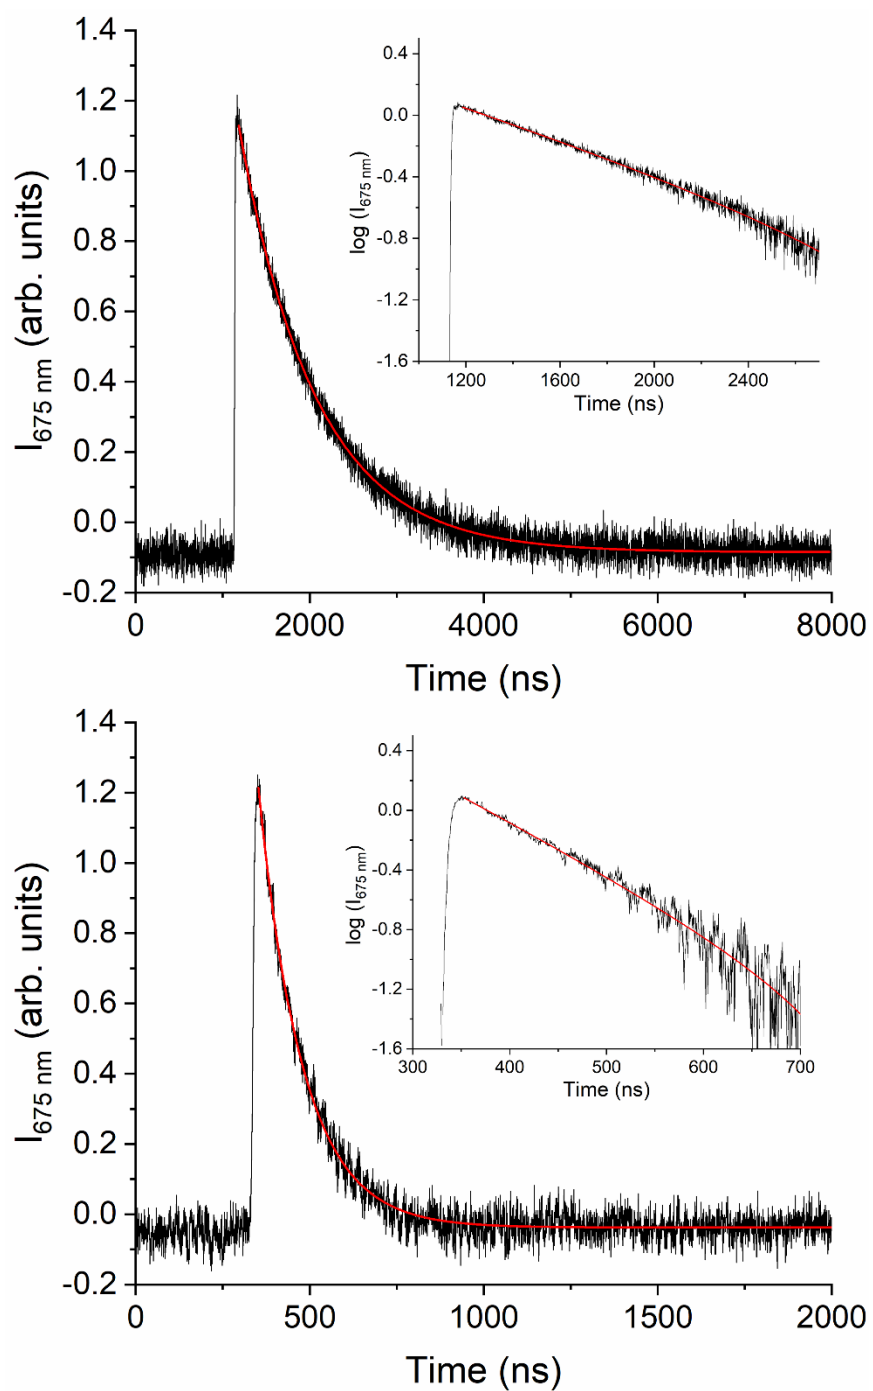

**Supplementary Figure 25.** Emission decay of **5** in deaerated (top) and aerated (bottom)  $\text{CH}_3\text{CN}$ . Insets show the intensity plotted on a log scale (excited at 480 nm and decay trace taken at 670 nm).

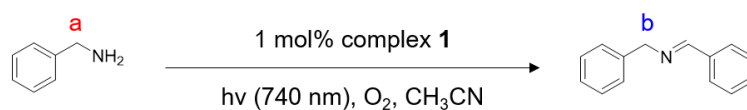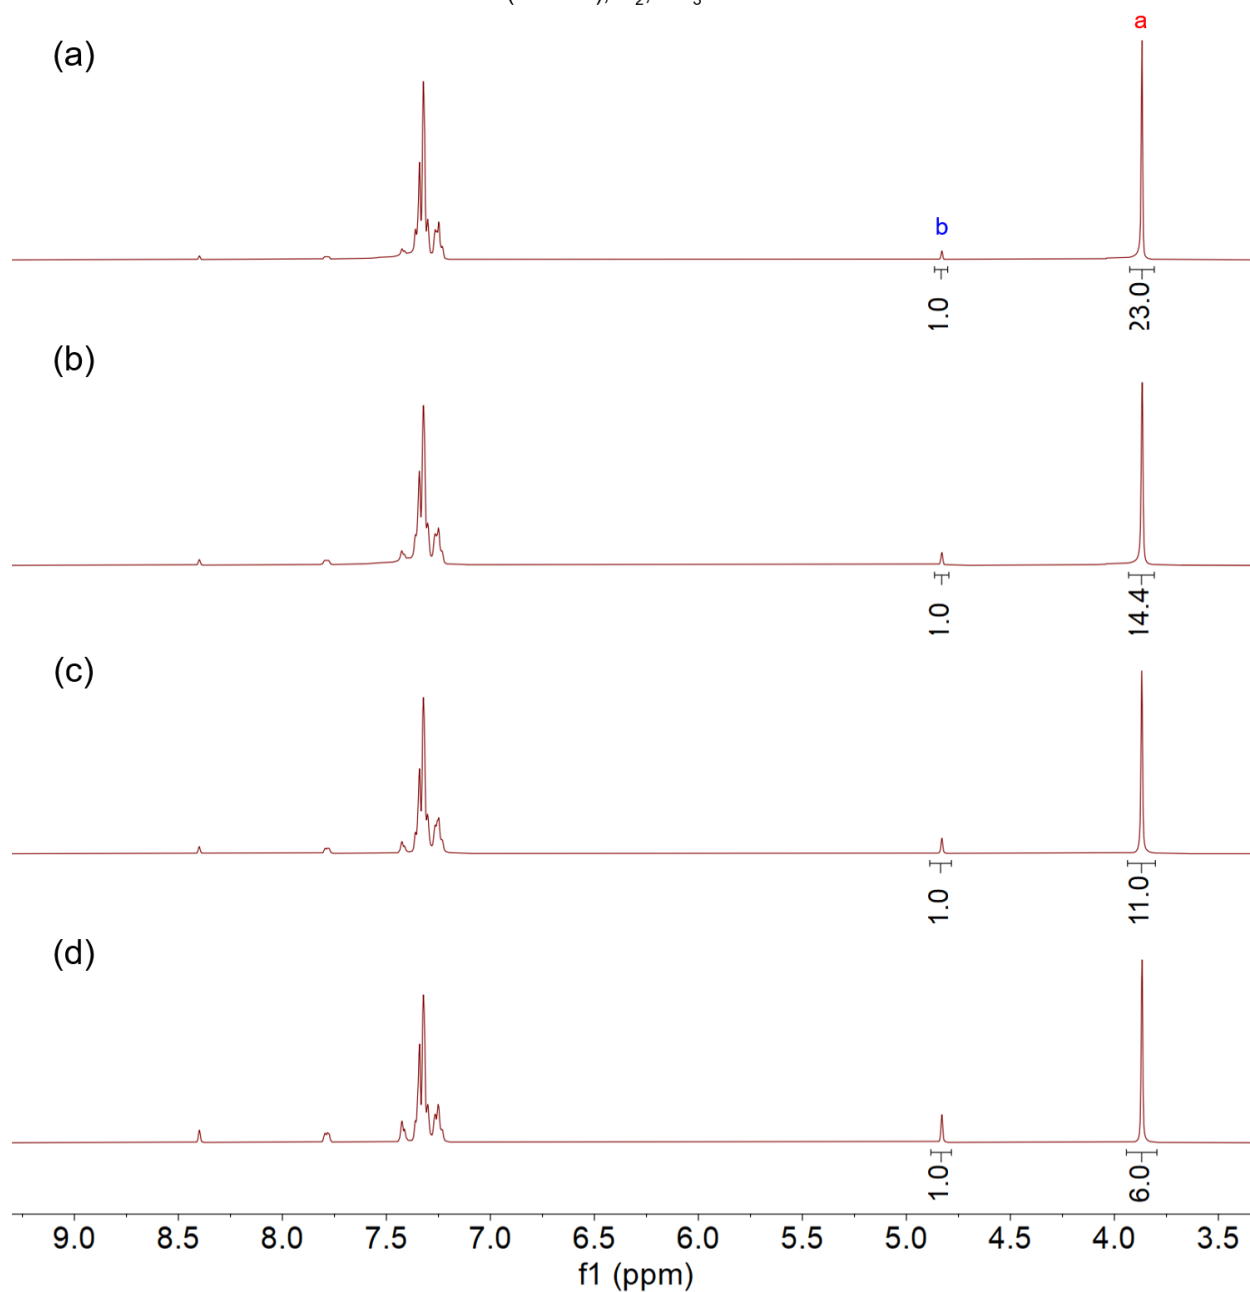

**Supplementary Figure 26.**  $^1\text{H}$  NMR (400 MHz,  $\text{CDCl}_3$ , 298 K) spectra of benzyl amine C-N coupling using **1** as the photosensitizer with different irradiation time: (a) 30 min; (b) 1 h; (c) 2 h; (d) 4 h. Condition: 50 mM benzyl amine, 1 mol% **1**, 5 mL  $\text{CH}_3\text{CN}$ ,  $\text{O}_2$ , 740 nm LEDs, room temperature.

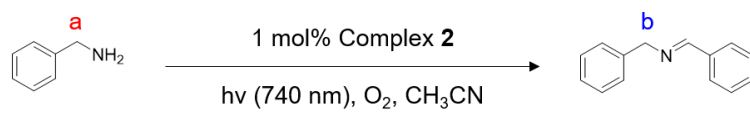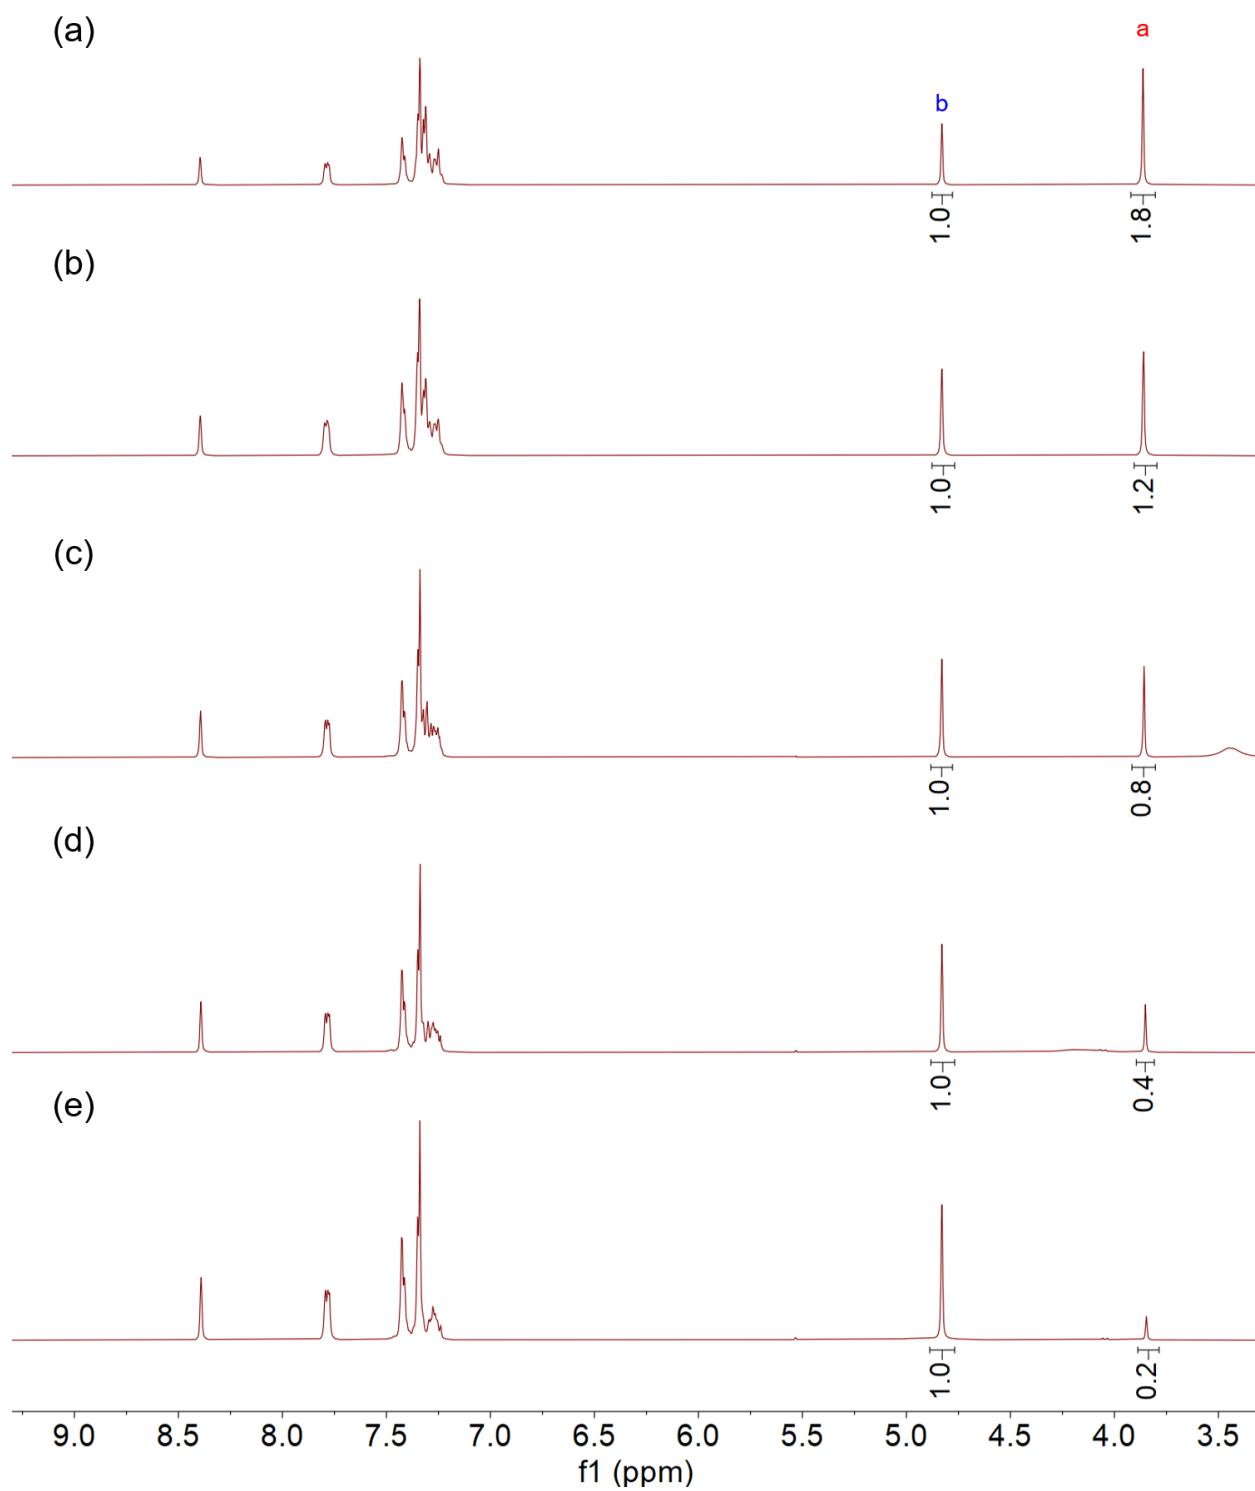

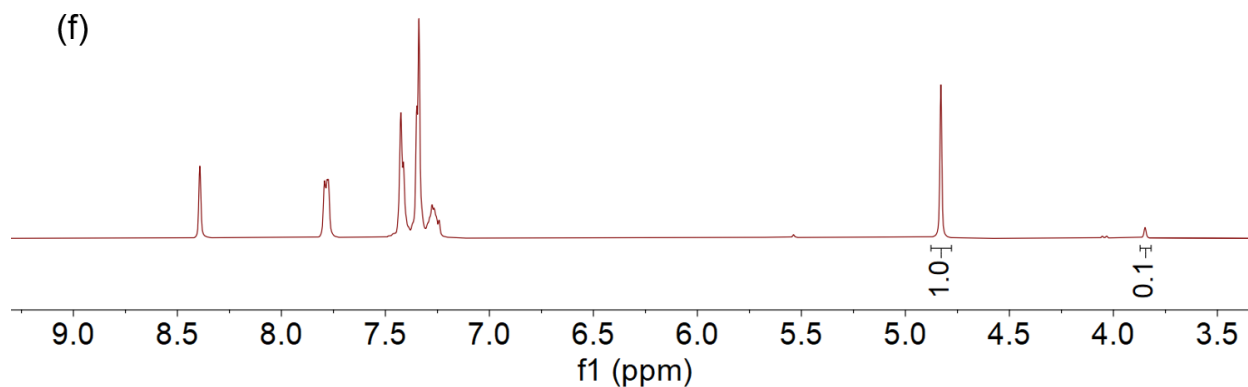

**Supplementary Figure 27.** <sup>1</sup>H NMR (400 MHz, CDCl<sub>3</sub>, 298 K) spectra of benzyl amine C-N coupling using **2** as the photosensitizer with different irradiation time: (a) 20 min; (b) 30 min; (c) 40 min; (d) 60 min; (e) 80 min; (f) 100 min. Condition: 50 mM of benzyl amine, 1 mol% **2**, 5 mL CH<sub>3</sub>CN, O<sub>2</sub>, 740 nm LEDs, room temperature.

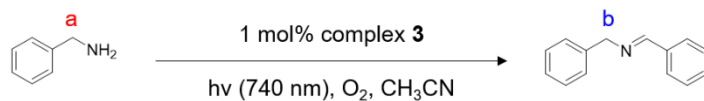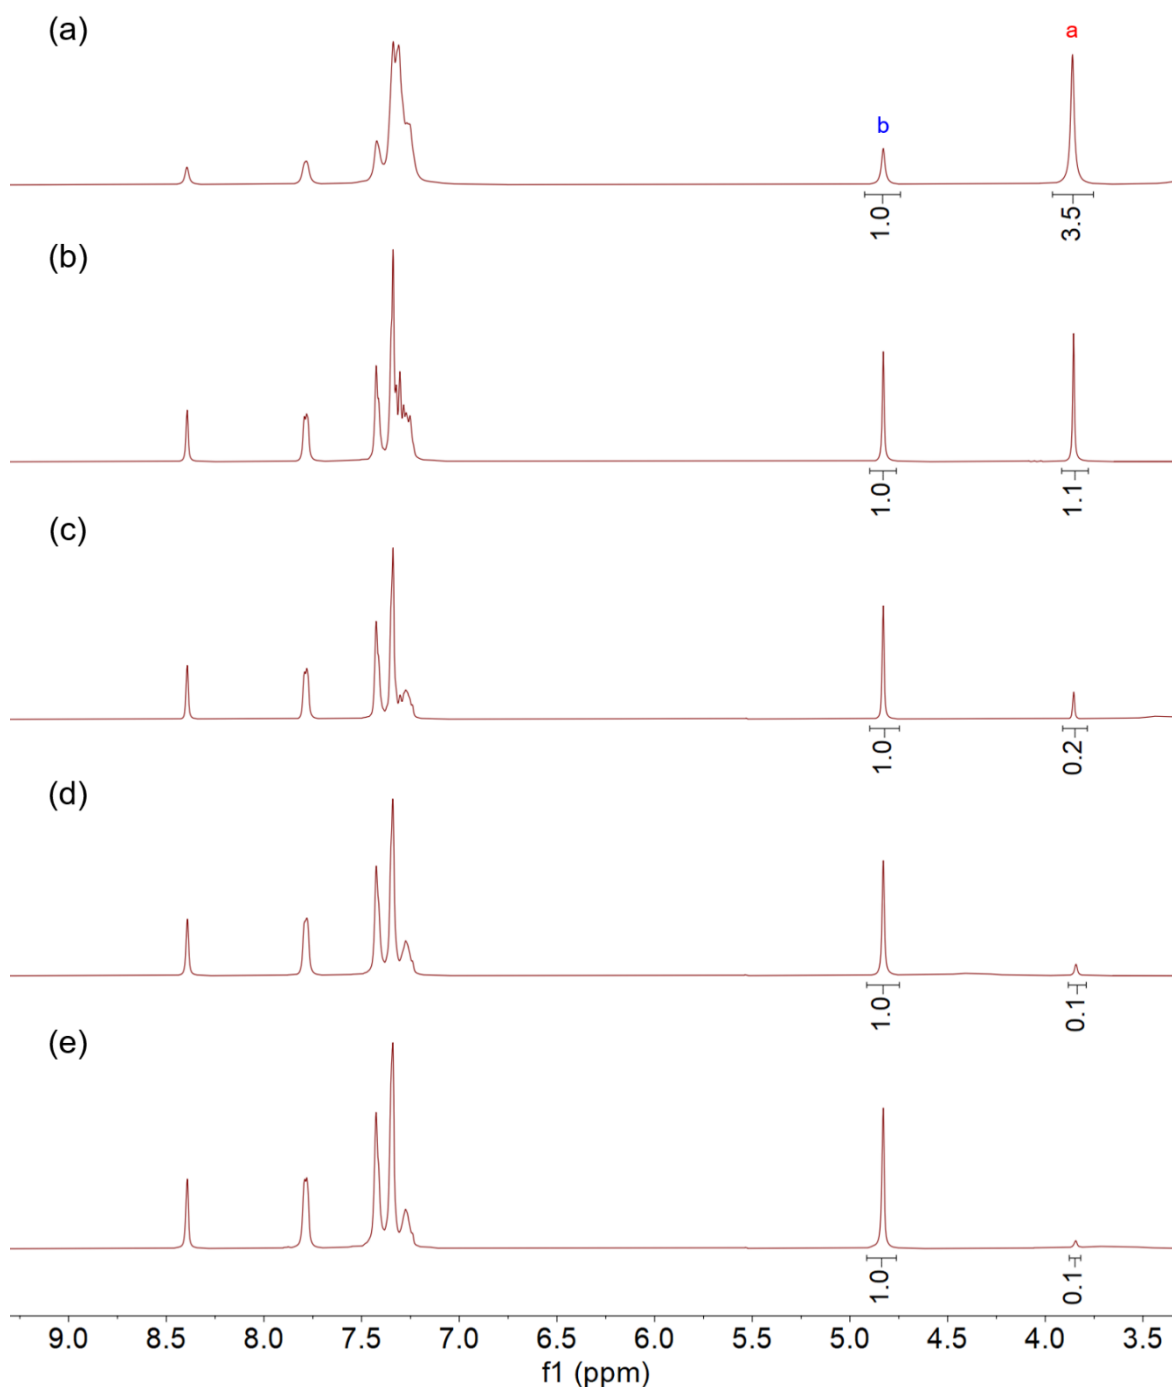

**Supplementary Figure 28.**  $^1\text{H}$  NMR (400 MHz,  $\text{CDCl}_3$ , 298 K) spectra of benzyl amine C-N coupling using **3** as the photosensitizer with different irradiation time: (a) 10 min; (b) 20 min; (c) 30 min; (d) 40 min; (e) 50 min. Condition: 50 mM benzyl amine, 1 mol% **3**, 5 mL  $\text{CH}_3\text{CN}$ ,  $\text{O}_2$ , 740 nm LEDs, room temperature.

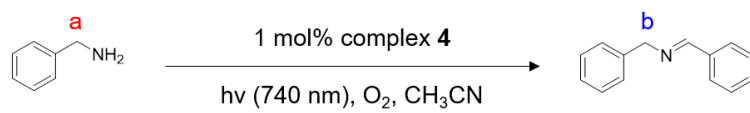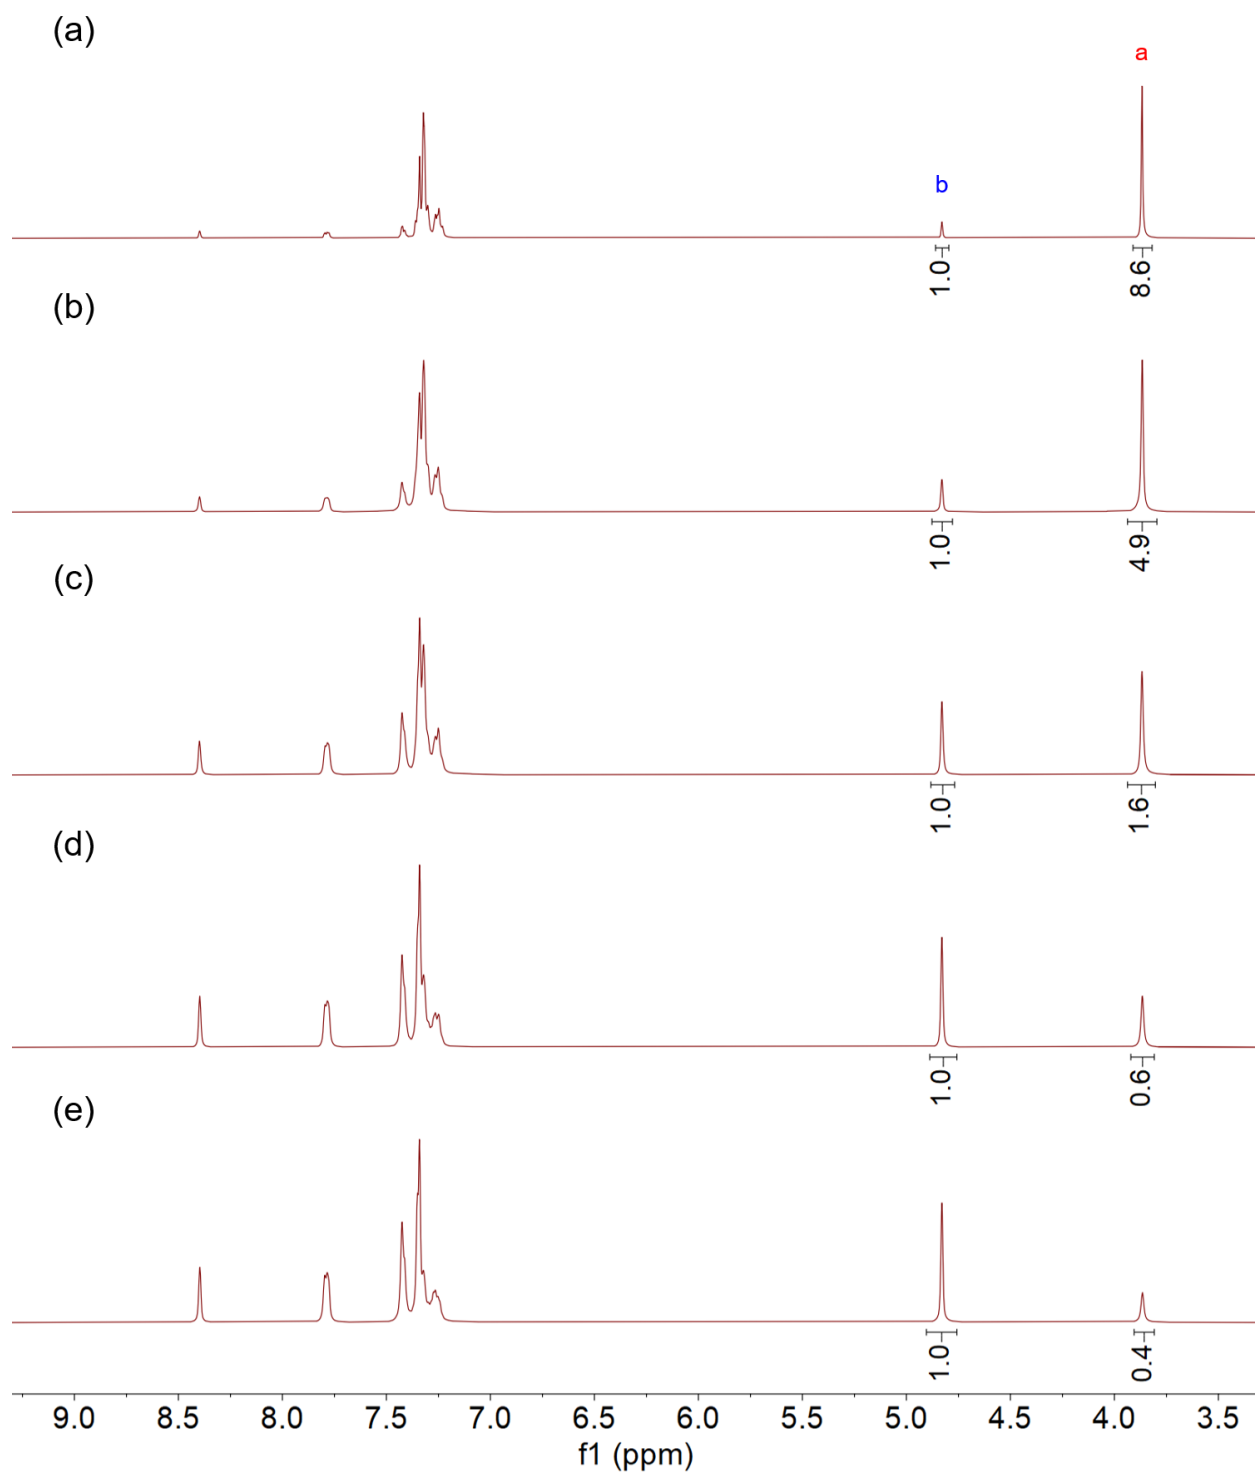



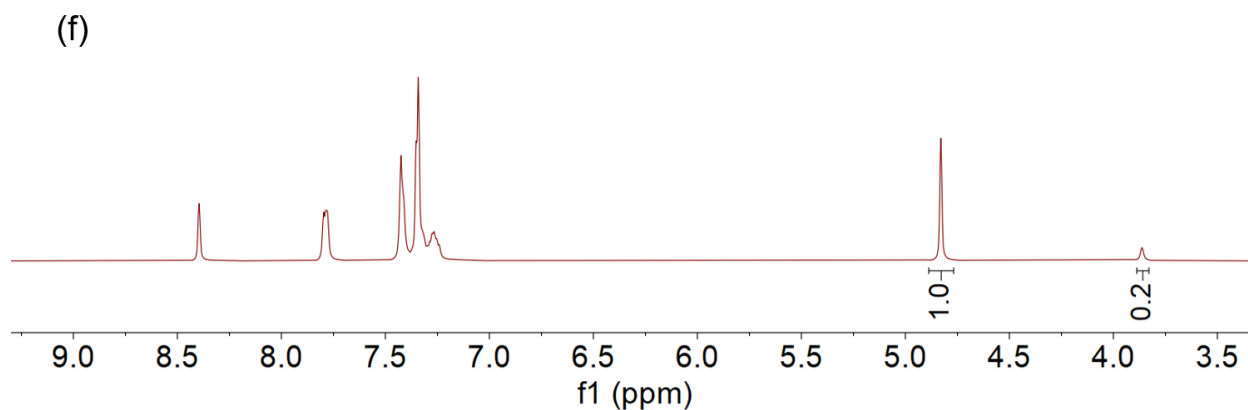

**Supplementary Figure 29.** <sup>1</sup>H NMR (400 MHz, CDCl<sub>3</sub>, 298 K) spectra of benzyl amine C-N coupling using **4** as the photosensitizer with different irradiation time: (a) 10 min; (b) 20 min; (c) 40 min; (d) 80 min; (e) 120 min; (f) 160 min. Condition: 50 mM benzyl amine, 1 mol% **4**, 5 mL CH<sub>3</sub>CN, O<sub>2</sub>, 740 nm LEDs, room temperature.

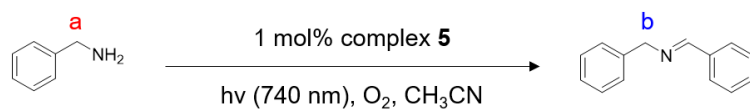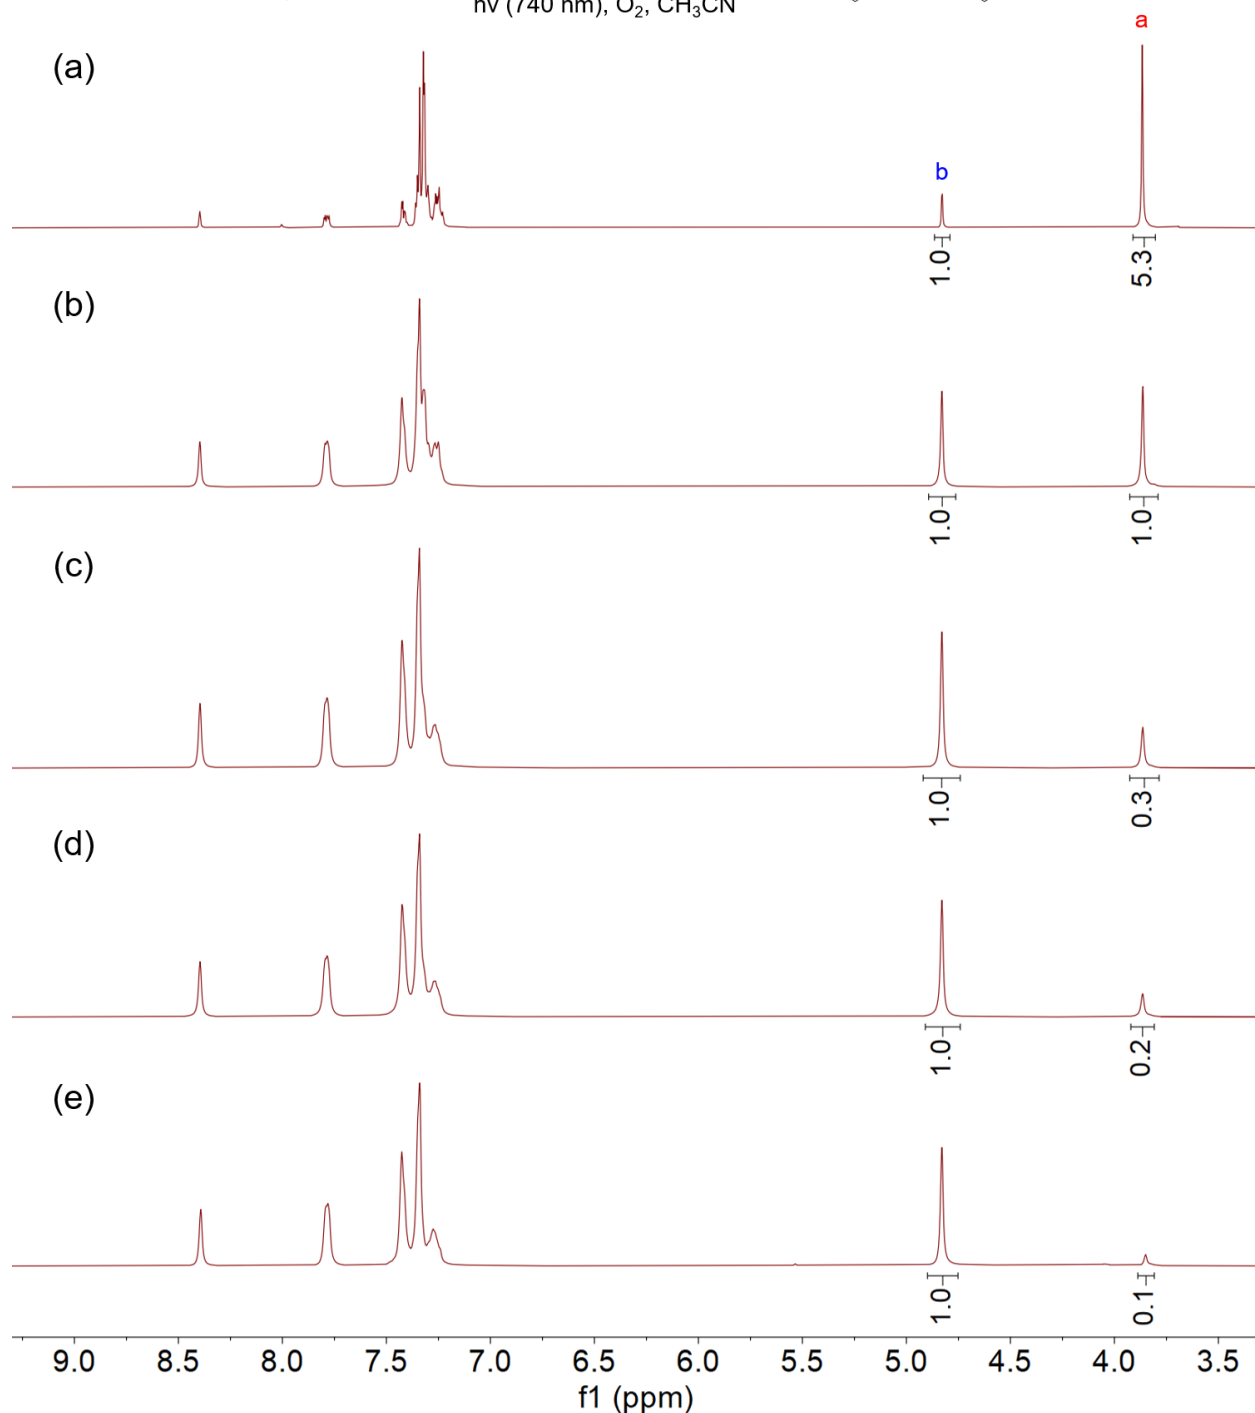

**Supplementary Figure 30.**  $^1\text{H}$  NMR (400 MHz,  $\text{CDCl}_3$ , 298 K) spectra of benzyl amine C-N coupling using **5** as the photosensitizer with different irradiation time: (a) 3 min; (b) 10 min; (c) 15 min; (d) 20 min; (e) 30 min. Condition: 50 mM benzyl amine, 1 mol% **5**, 5 mL  $\text{CH}_3\text{CN}$ ,  $\text{O}_2$ , 740 nm LEDs, room temperature.

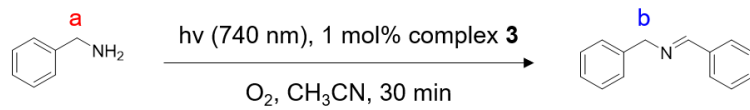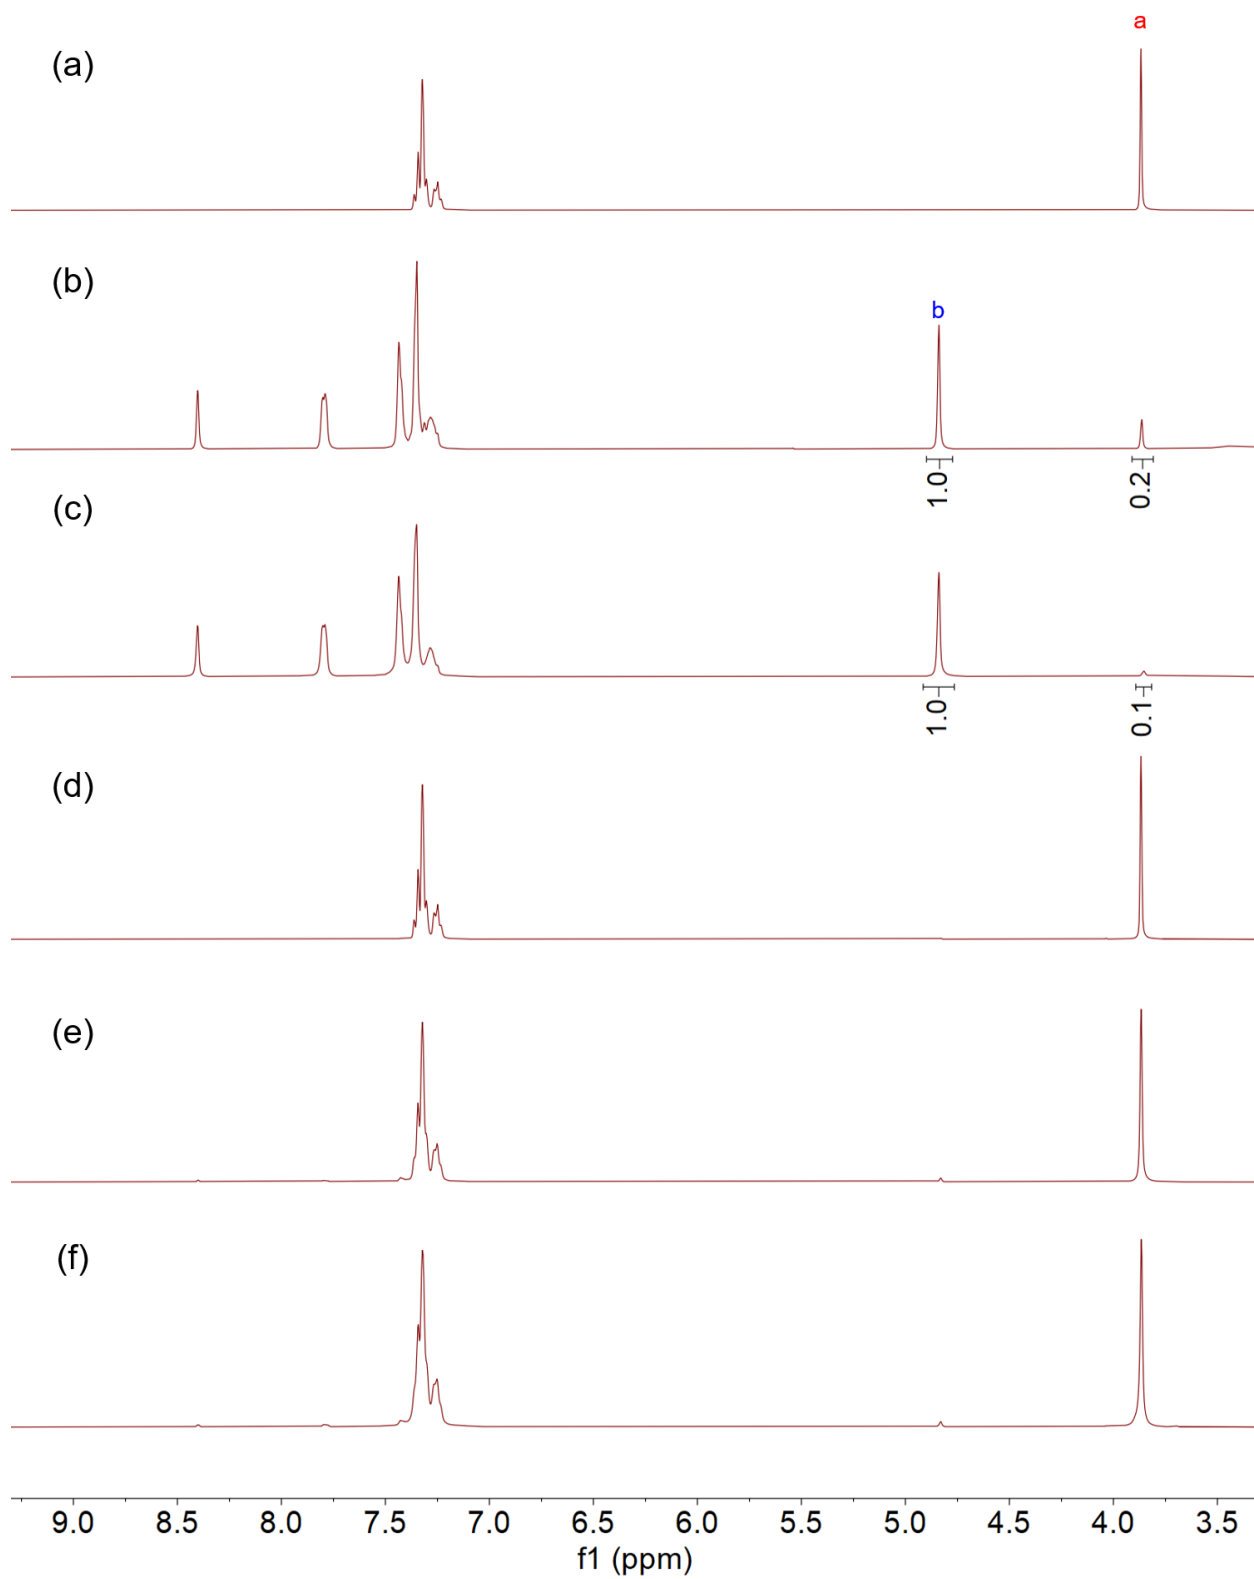

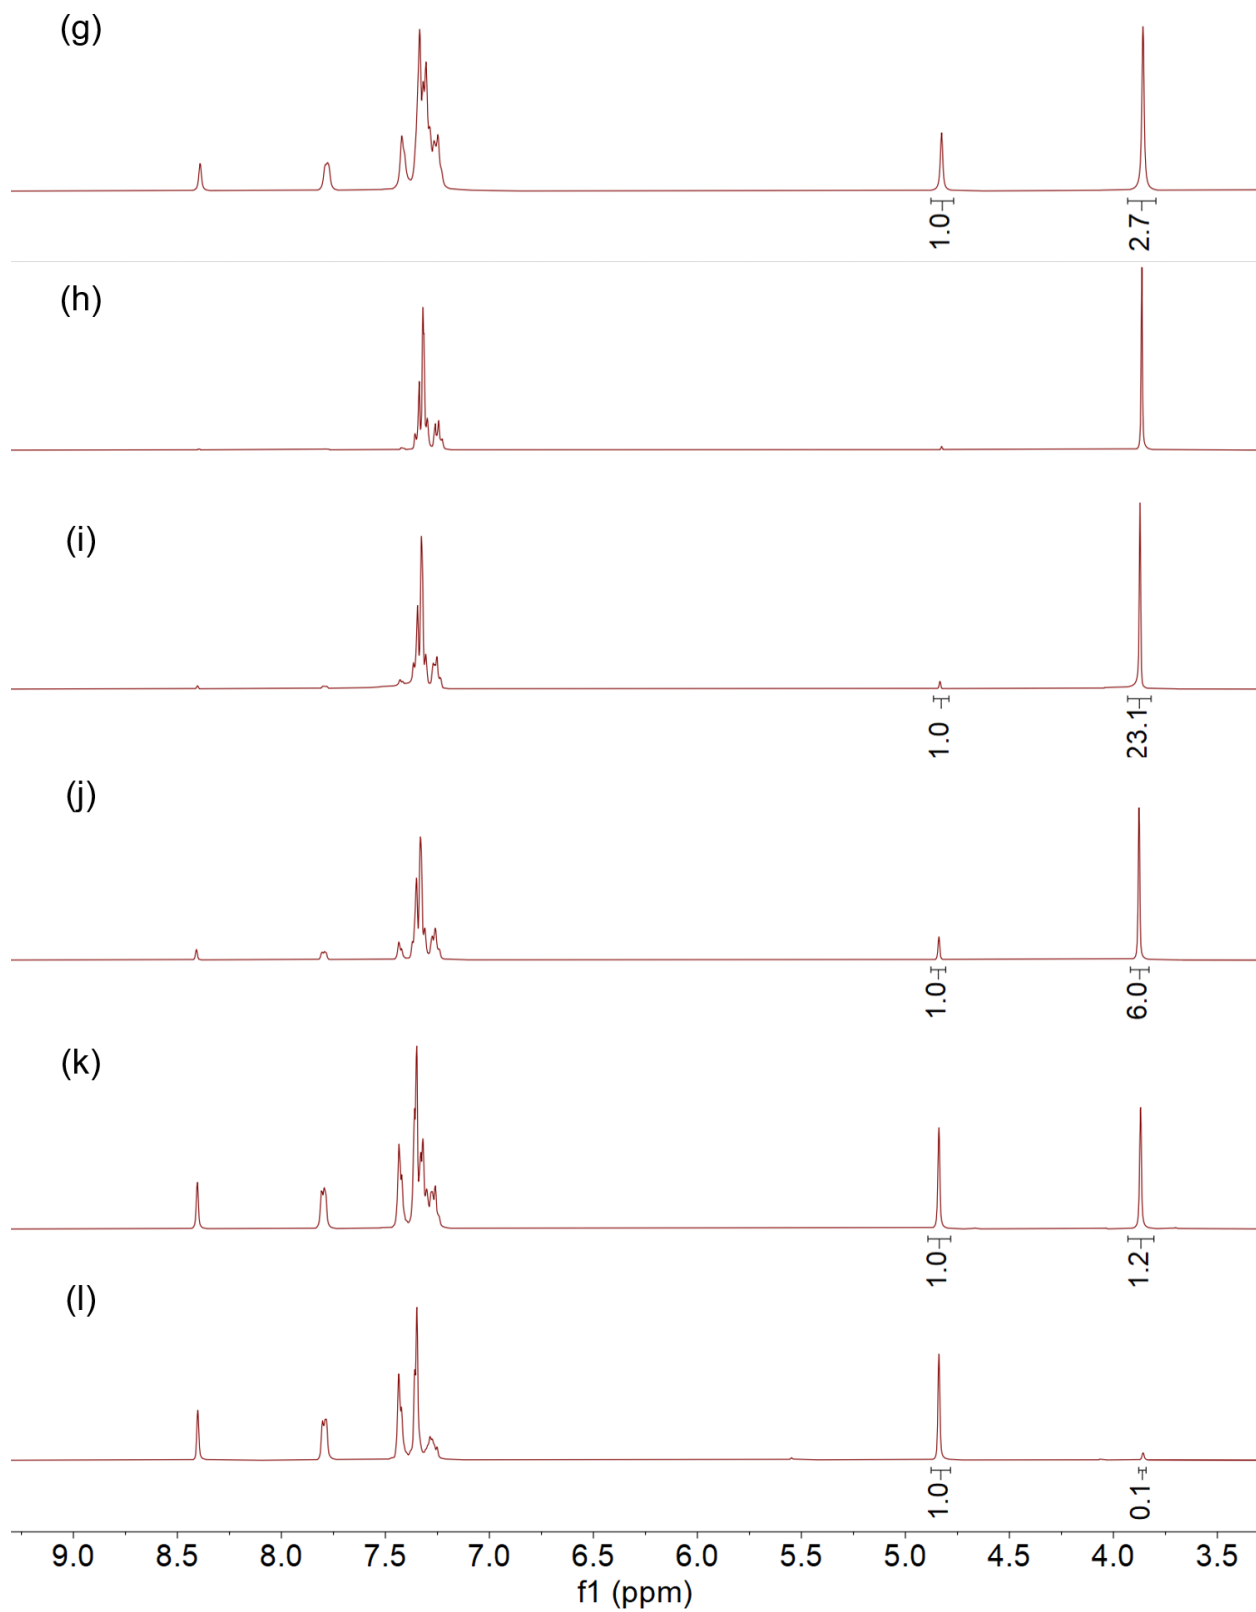

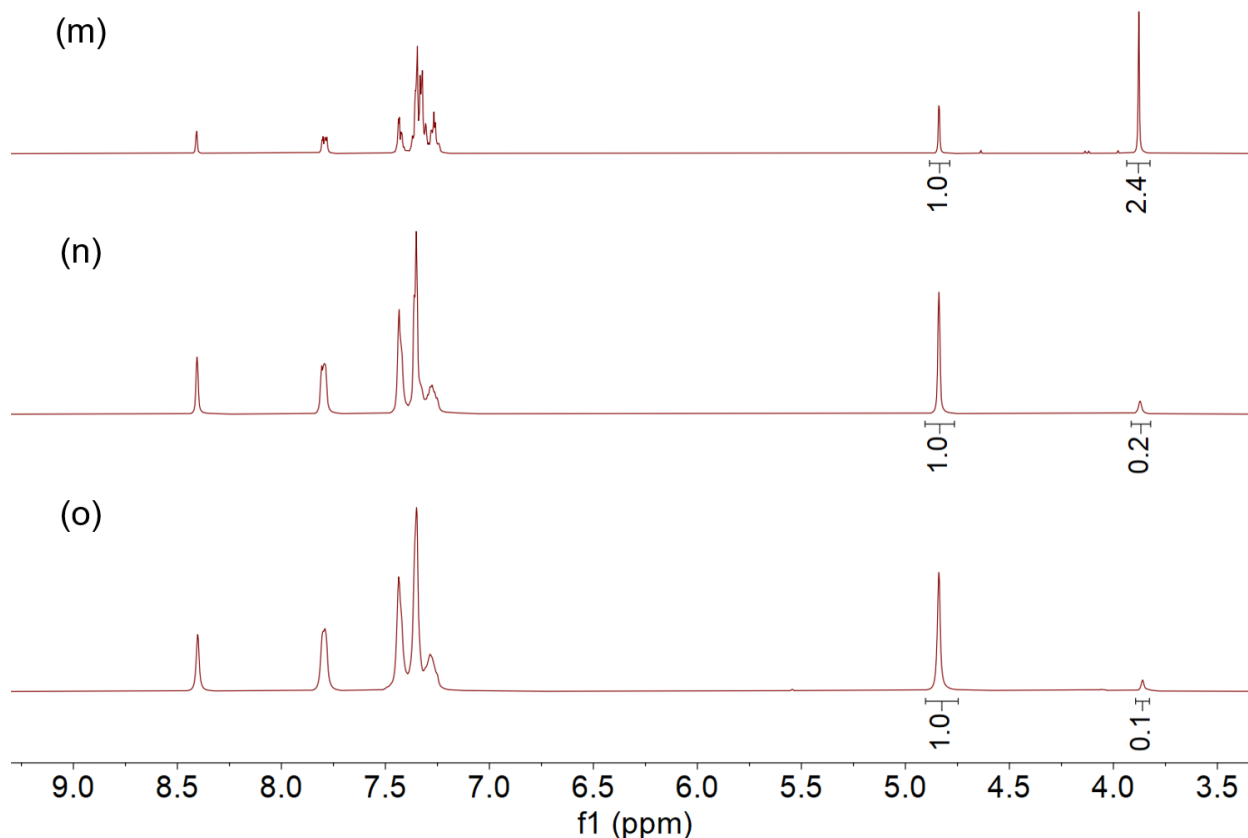

**Supplementary Figure 31.**  $^1\text{H}$  NMR (400 MHz,  $\text{CDCl}_3$ , 298 K) spectra of benzyl amine C-N coupling. (a) Standard benzyl amine; (b) Standard condition: 50 mM benzyl amine, 1 mol%, 5 mL  $\text{CH}_3\text{CN}$ ,  $\text{O}_2$ , 740 nm LEDs, room temperature, 30 min; (c) time is 50 min; (d) no photosensitizer; (e) no irradiation; (f) Ar atmosphere; (g) Air atmosphere; (h) photosensitizer is  $[\text{Ru}(\text{bpy})_3](\text{PF}_6)_2$ ; (i) photosensitizer is **1**; (j) photosensitizer is complex **1** and time is 4 h; (k) photosensitizer is **2**; (l) photosensitizer is **2** and time is 100 min; (m) photosensitizer is **4**; (n) photosensitizer **4** and time is 160 min; (o) photosensitizer is **5**.

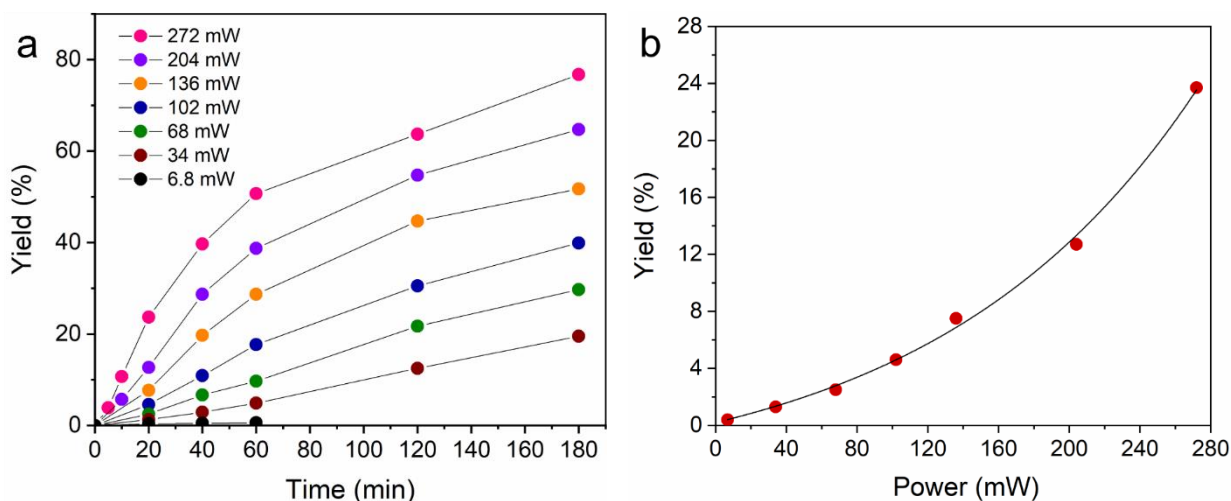

**Supplementary Figure 32.** (a) Yield change over time upon irradiation at 730 nm of different power. (b) The obtained yields after 20 min irradiation at 730 nm of different power. Conditions: 50 mM benzyl amine, 1 mol% **5**, 2 mL CH<sub>3</sub>CN, O<sub>2</sub>, irradiation using 730 nm LED (M730L5) of controlled power at room temperature with a 695 nm long-pass filter.

The LED illumination power of our newly purchased 730 nm LED can be finely tuned by the LED driver (Thorlabs, DC2200). As shown in **Supplementary Figure 32a**, during the first 20 min photocatalysis, the product yield is linearly increased with the irradiation duration as the starting material concentration is not depleted to become a limiting factor. Consequently, we plotted the yield obtained at 20 min versus the LED power in **Supplementary Figure 32b**. It is apparent that when we increased the LED power from 6.8 to 272 mW, a non-linear increase in yield was observed, in agreement with the two-photon absorption mechanism of our photocatalyst (complex **5** in this case).

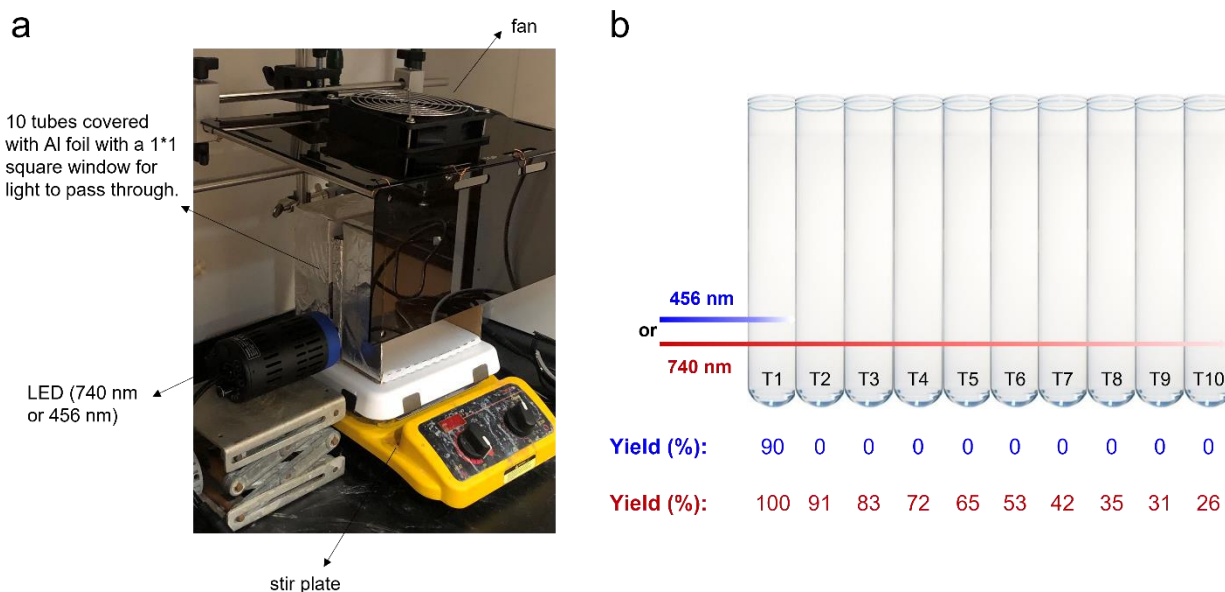

**Supplementary Figure 33.** (a) Experimental set-up. (b) Yields of the photocatalytic C-N coupling of benzyl amine in different reaction tubes. Photocatalysis condition of each tube: 50 mM benzyl amine, 1 mol% **5**, 4 mL CH<sub>3</sub>CN, open to air, irradiation at 456 or 740 nm for 6 h at room temperature.

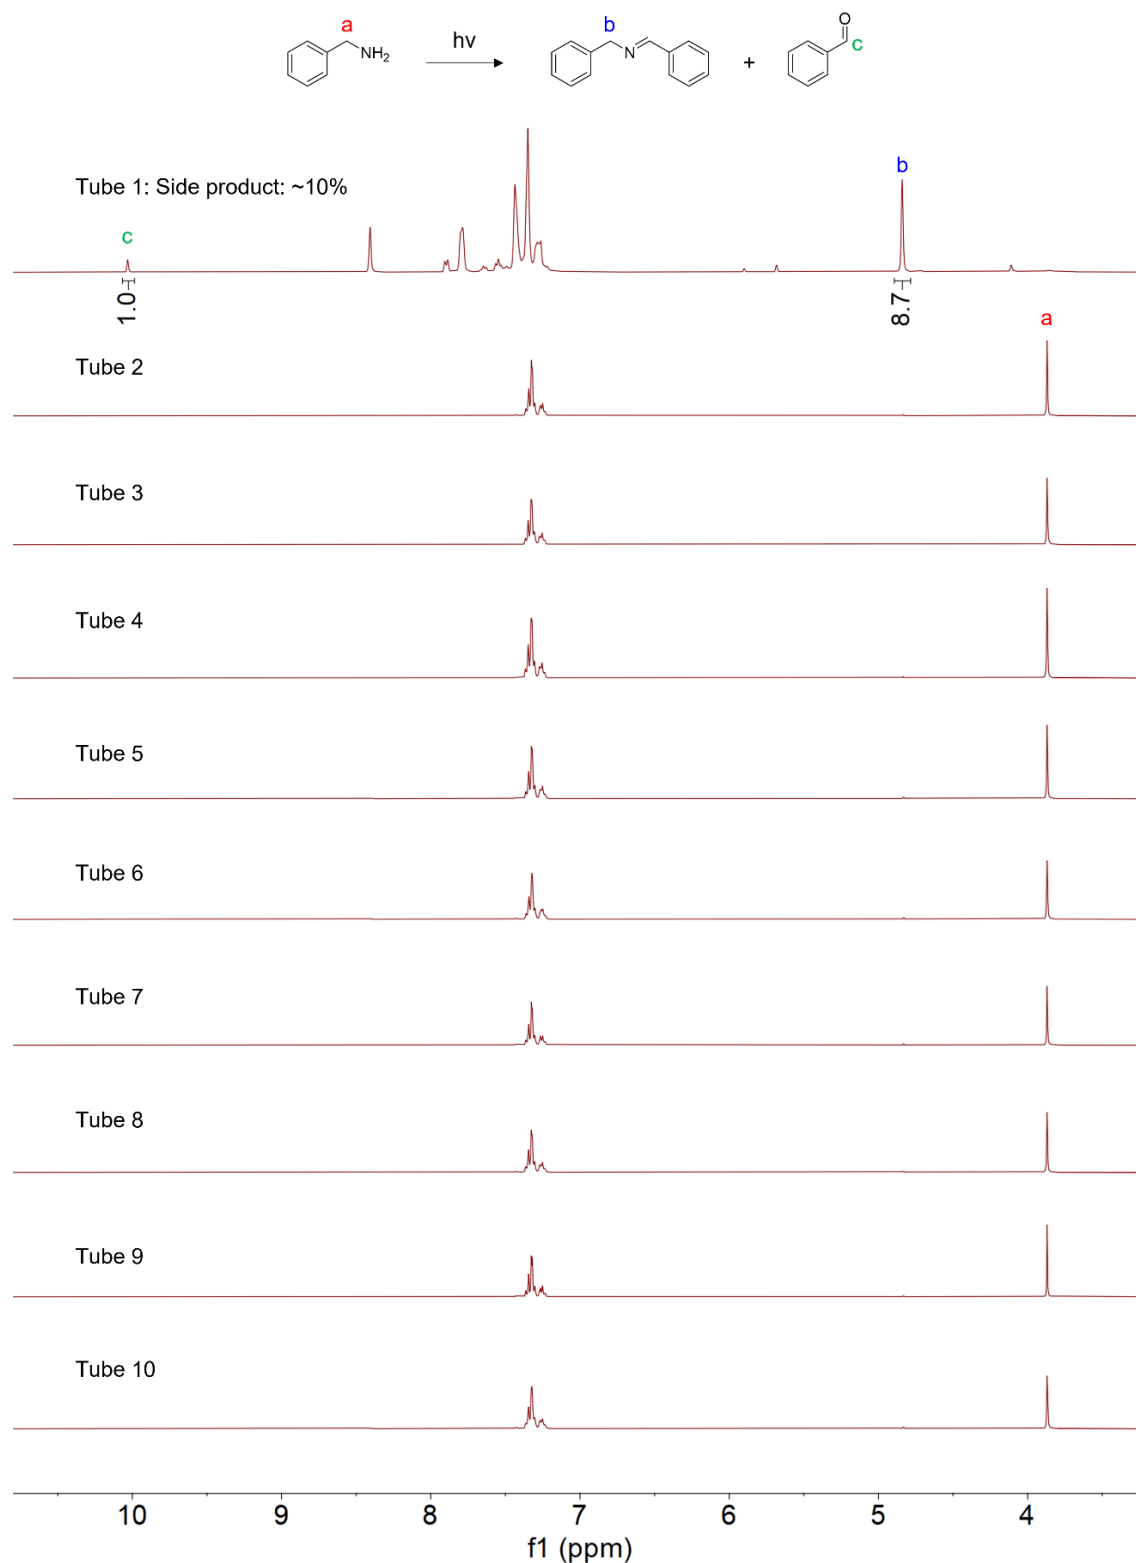

**Supplementary Figure 34.**  $^1\text{H}$  NMR (400 MHz,  $\text{CDCl}_3$ , 298 K) spectra of the photocatalytic C-N coupling of benzyl amine in different reaction tubes. Photocatalysis condition of each tube: 50 mM benzyl amine, 1 mol% **5**, 4 mL  $\text{CH}_3\text{CN}$ , open to air, irradiation at 456 nm for 6 h at room temperature.



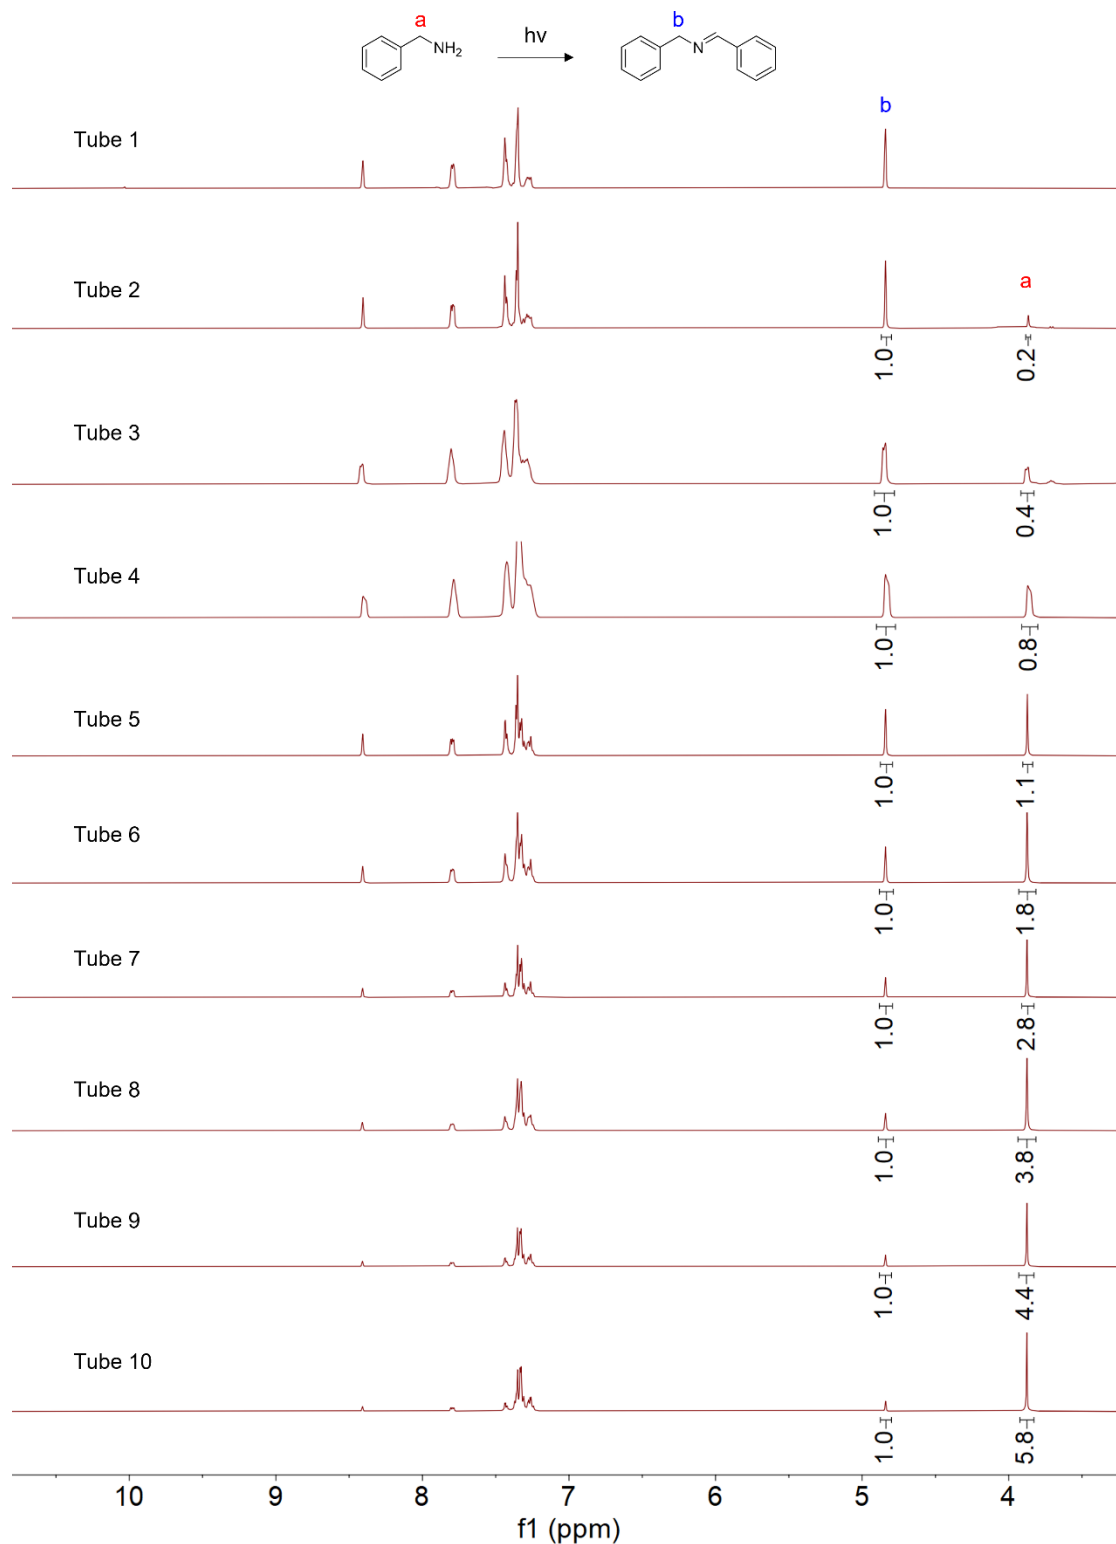

**Supplementary Figure 35.**  $^1\text{H}$  NMR (400 MHz,  $\text{CDCl}_3$ , 298 K) spectra of the photocatalytic C-N coupling of benzyl amine in different reaction tubes. Photocatalysis condition of each tube: 50 mM benzyl amine, 1 mol% **5**, 4 mL  $\text{CH}_3\text{CN}$ , open to air, irradiation at 740 nm for 6 h at room temperature.

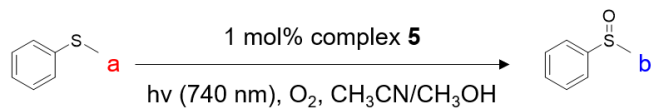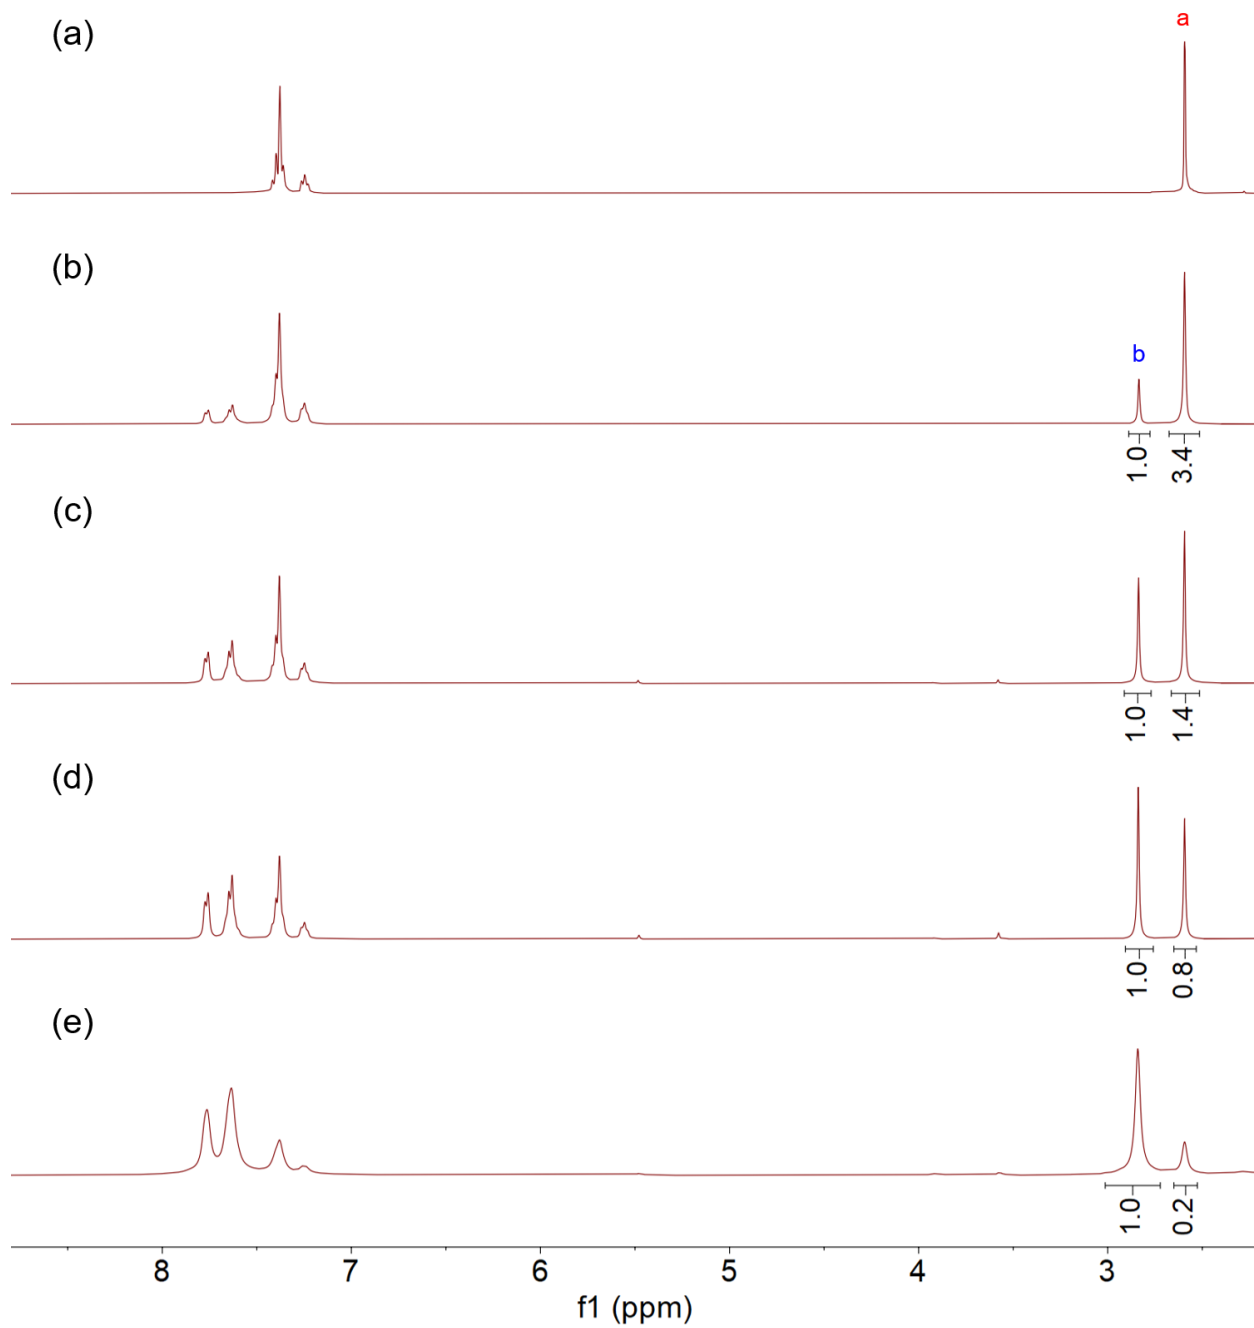

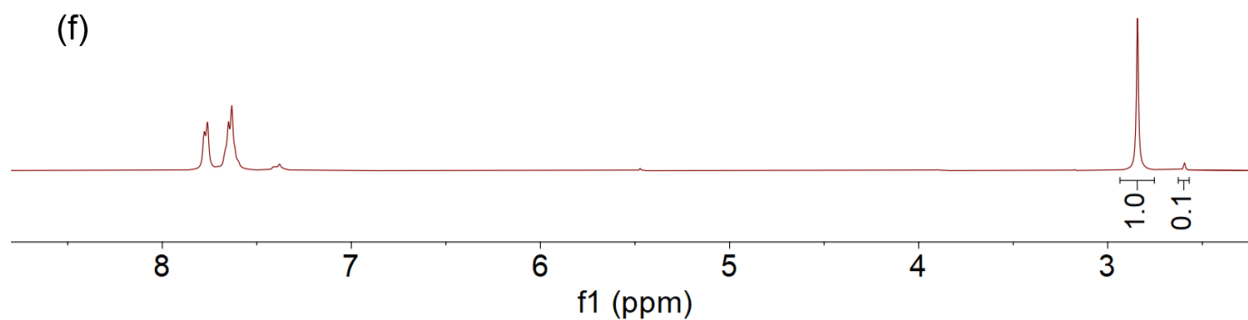

**Supplementary Figure 36.**  $^1\text{H}$  NMR (400 MHz,  $\text{CDCl}_3$ , 298 K) spectra of thioanisole sulfoxidation using **5** as the photosensitizer with different irradiation time: (a) standard thioanisole; (b) 20 min; (c) 40 min; (d) 1 h; (e) 2 h; (f) 3 h. Condition: 50 mM benzyl amine, 1 mol% **5**, 4 mL  $\text{CH}_3\text{CN}$ , 1 mL  $\text{CH}_3\text{OH}$ ,  $\text{O}_2$ , 740 nm LEDs, room temperature.

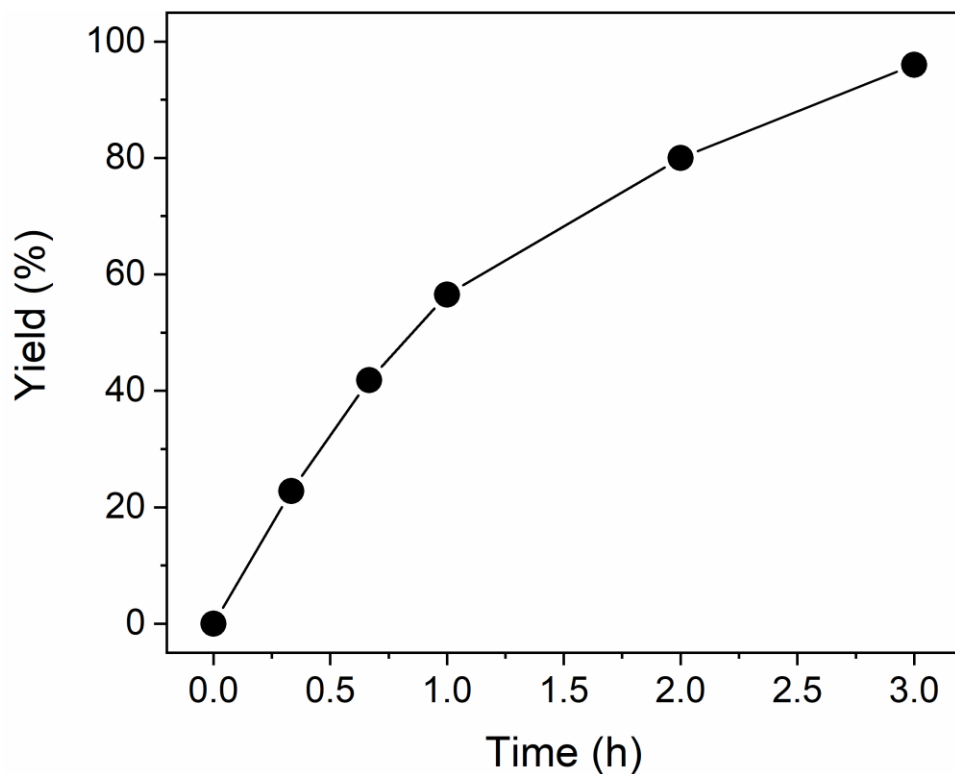

**Supplementary Figure 37.** Yield change over time of thioanisole sulfoxidation. Condition: 50 mM thioanisole, 1 mol% **5**, 4 mL  $\text{CH}_3\text{CN}$ , 1 mL  $\text{CH}_3\text{OH}$ ,  $\text{O}_2$ , 740 nm LEDs, room temperature.

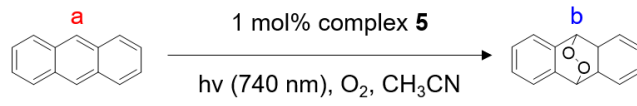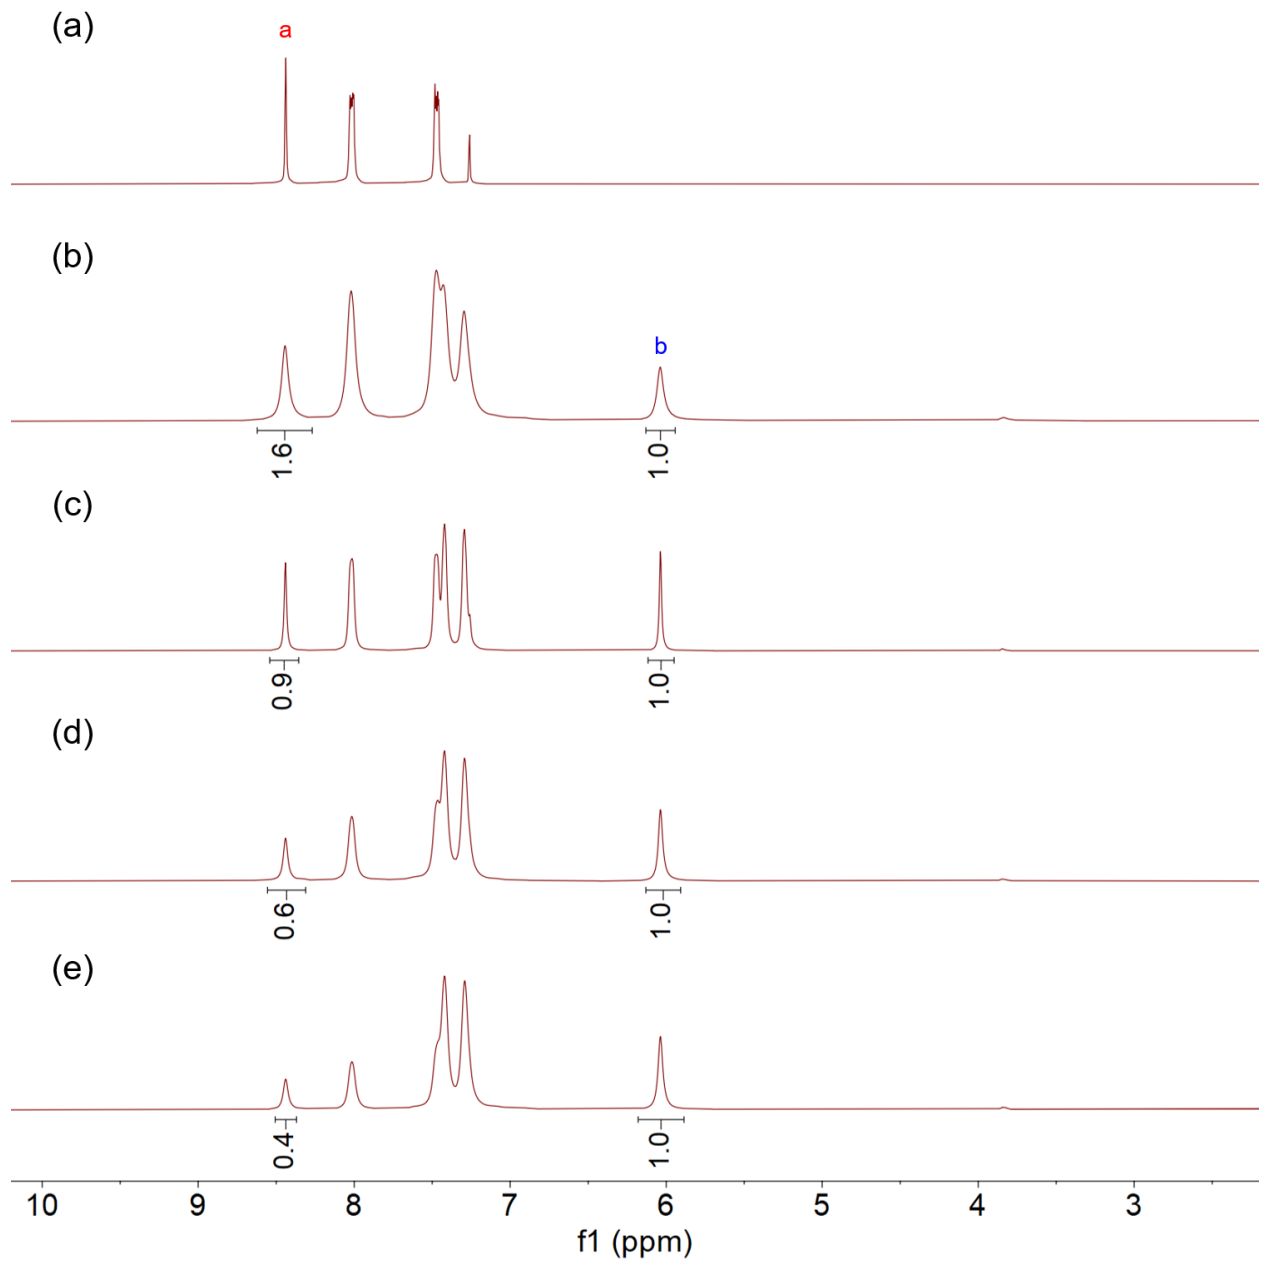

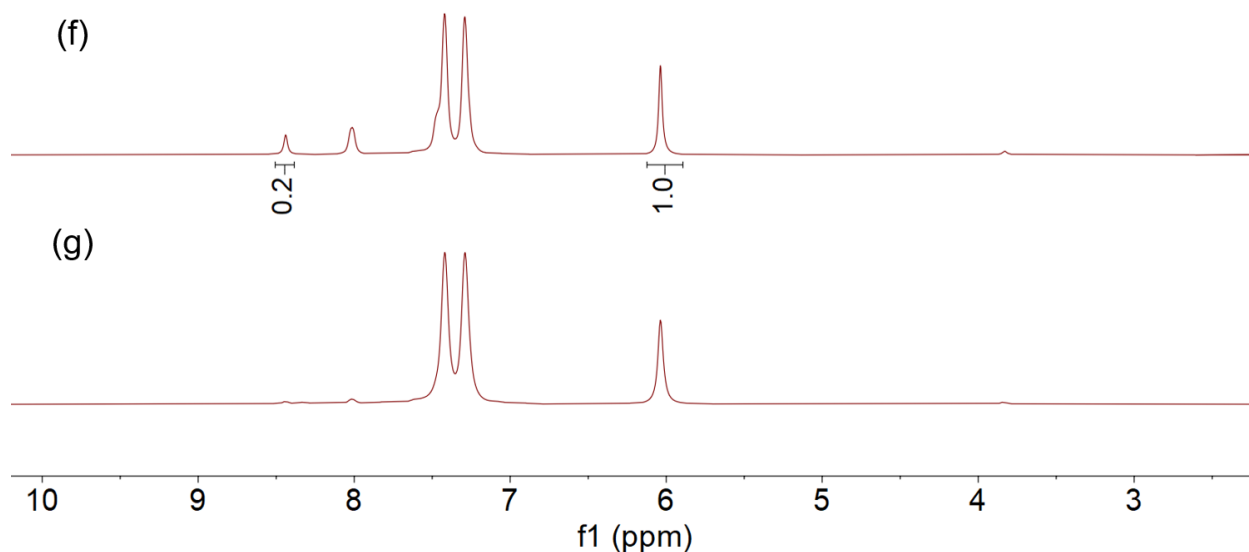

**Supplementary Figure 38.**  $^1\text{H}$  NMR (400 MHz,  $\text{CDCl}_3$ , 298 K) spectra of anthracene [4+2] Diels-Alder reaction using **5** as the photosensitizer with different irradiation time: (a) standard anthracene; (b) 20 min; (c) 40 min; (d) 1 h; (e) 2 h; (f) 4 h; (g) 6 h. Condition: 10 mM anthracene, 1 mol% **5**, 5 mL  $\text{CH}_3\text{CN}$ ,  $\text{O}_2$ , 740 nm LEDs, room temperature.

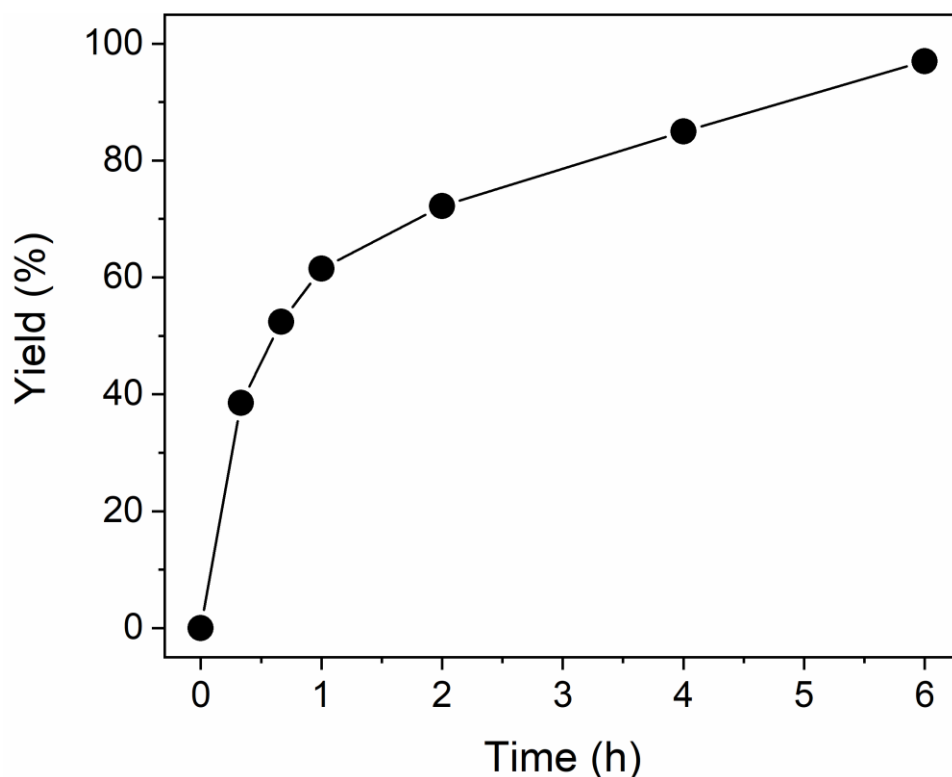

**Supplementary Figure 39.** Yield change over time of anthracene [4+2] Diels-Alder reaction. Condition: 10 mM anthracene, 1 mol% **5**, 4 mL  $\text{CH}_3\text{CN}$ ,  $\text{O}_2$ , 740 nm LEDs, room temperature.

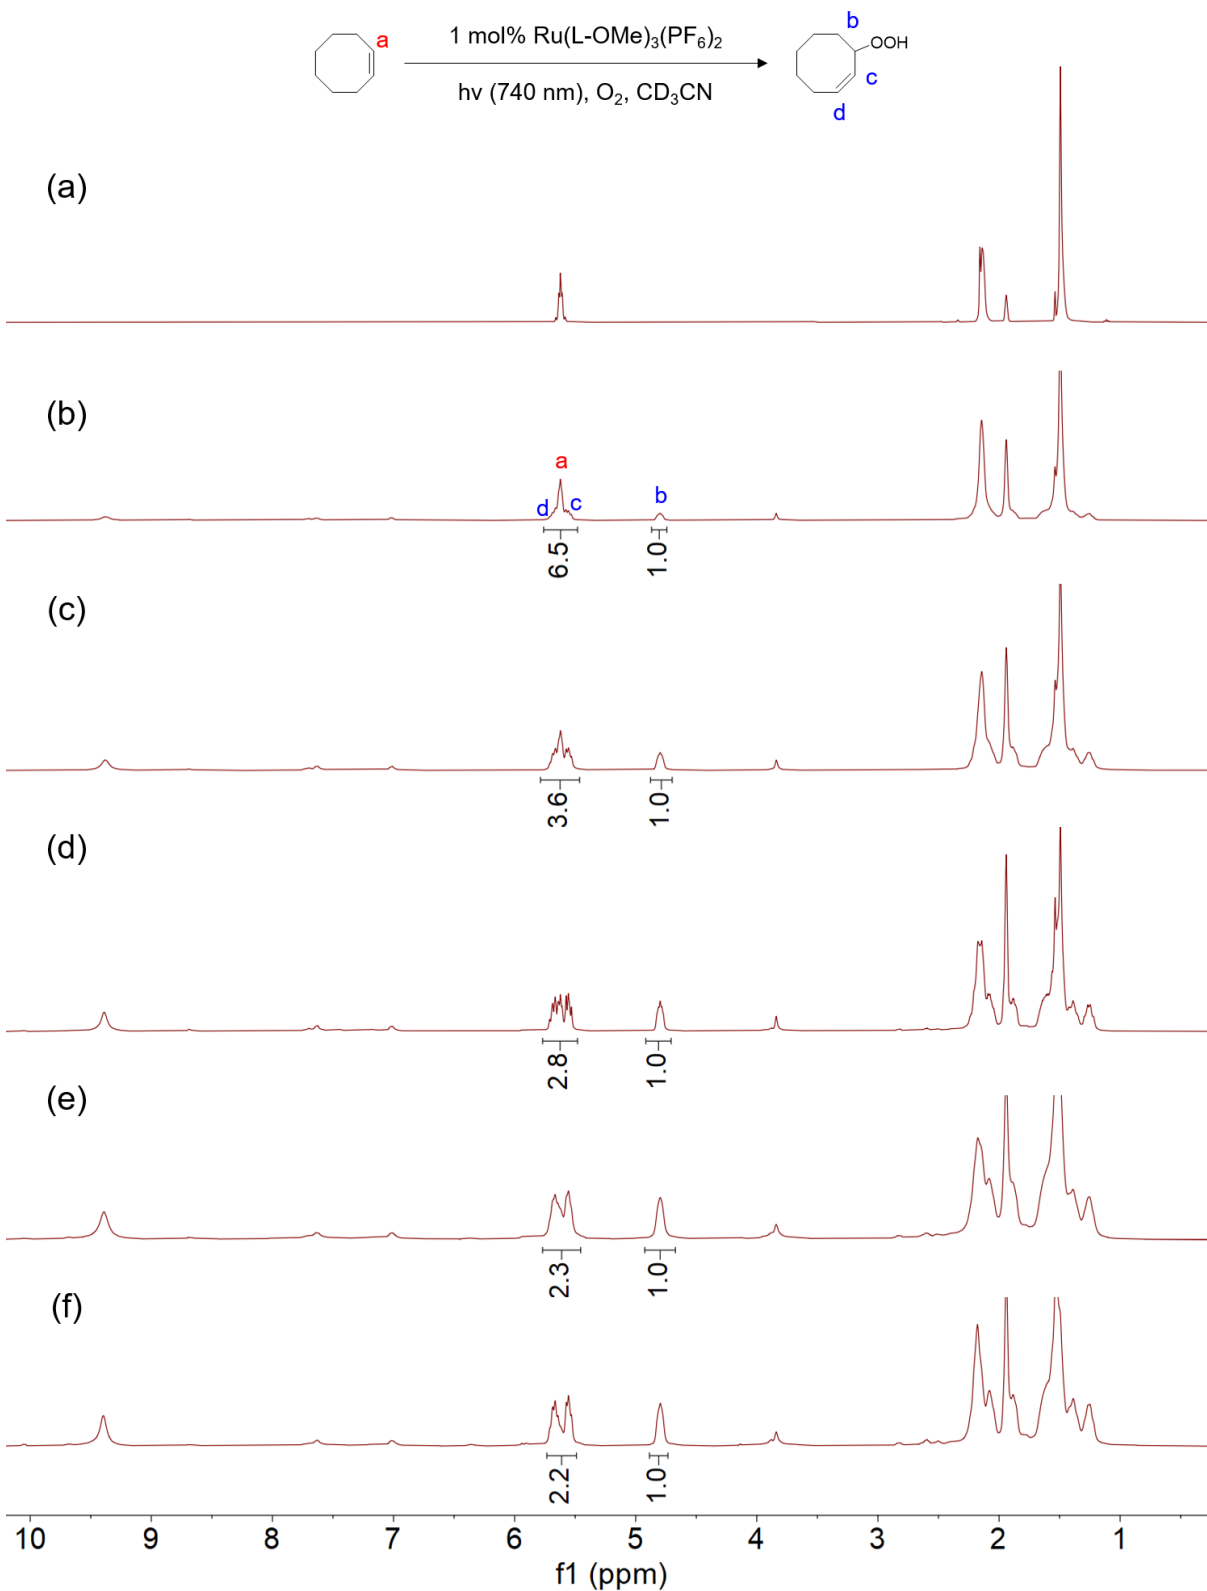

**Supplementary Figure 40.**  $^1\text{H}$  NMR (400 MHz,  $\text{CDCl}_3$ , 298 K) spectra of cyclooctene oxidation using **5** as the photosensitizer with different irradiation time: (a) standard cyclooctene; (b) 1 h; (c)

3 h; (d) 5 h; (e) 7 h; (f) 10 h. Condition: 50 mM cyclooctene, 1 mol% **5**, 5 mL CD<sub>3</sub>CN, O<sub>2</sub>, 740 nm LEDs, room temperature.

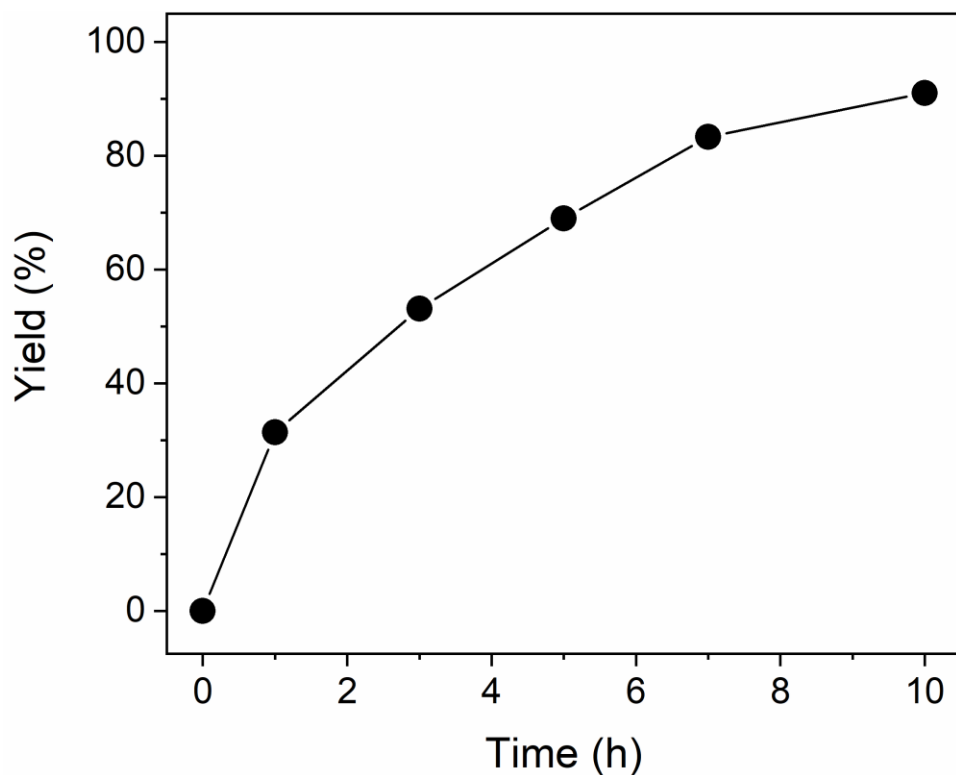

**Supplementary Figure 41.** Yield change over time of anthracene oxidation. Condition: 10 mM anthracene, 1 mol% **5**, 5 mL CH<sub>3</sub>CN, O<sub>2</sub>, 740 nm LEDs, room temperature.

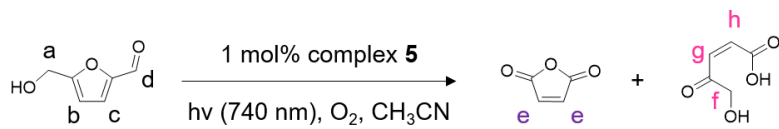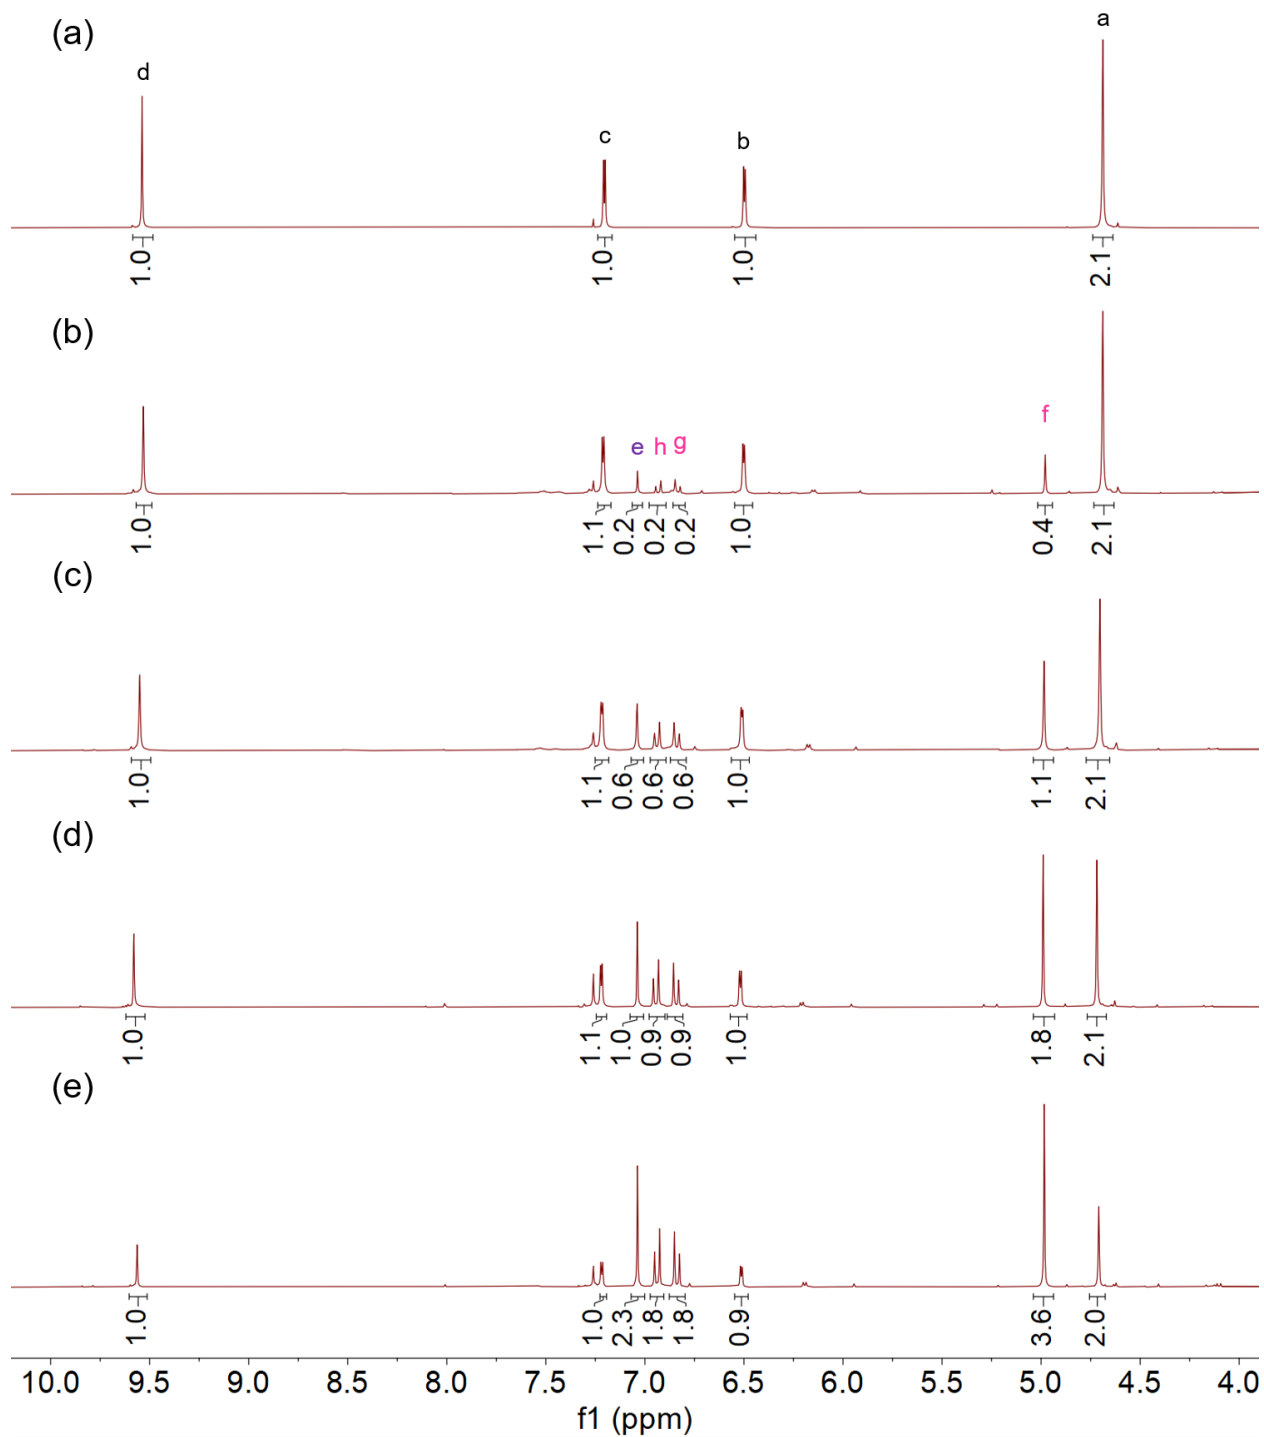



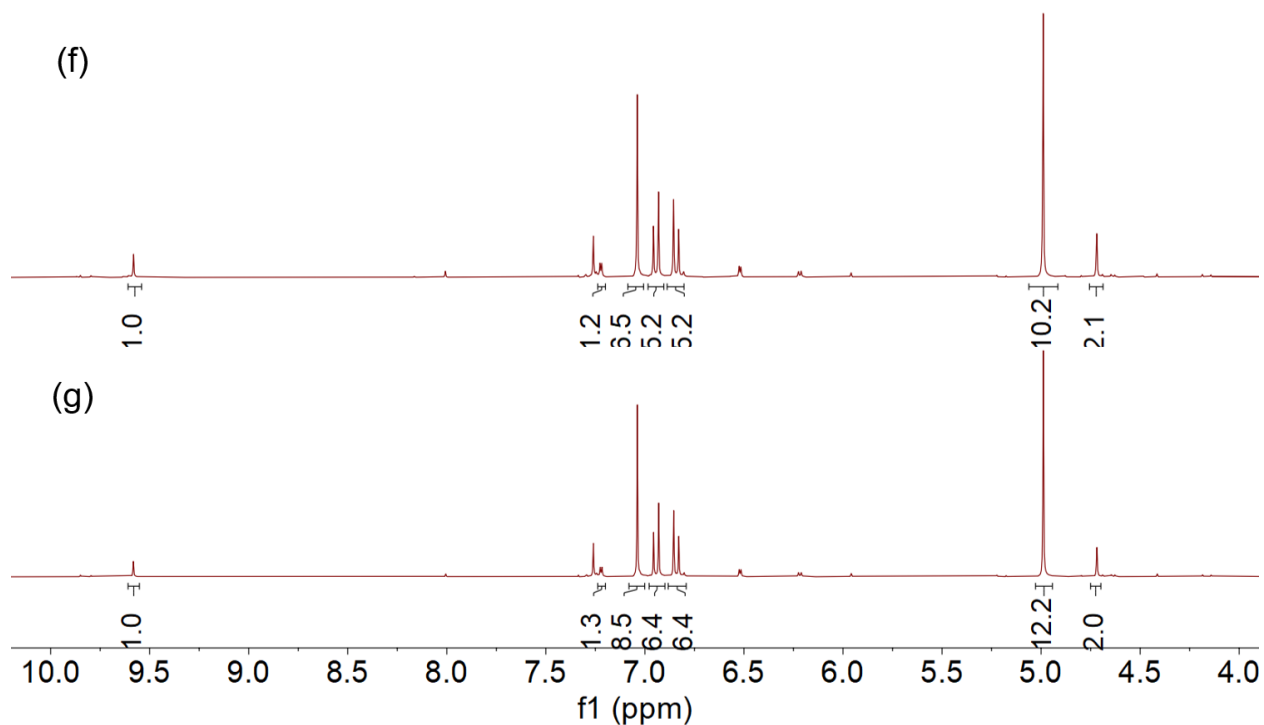

**Supplementary Figure 42.**  $^1\text{H}$  NMR (400 MHz,  $\text{CDCl}_3$ , 298 K) spectra of HMF oxidation using **5** as the photosensitizer with different irradiation time: (a) standard HMF; (b) 30 min; (c) 1 h; (d) 2 h; (e) 3 h; (f) 4 h; (g) 5 h. Condition: 50 mM HMF, 1 mol% **5**, 5 mL  $\text{CH}_3\text{CN}$ ,  $\text{O}_2$ , 740 nm LEDs, room temperature.

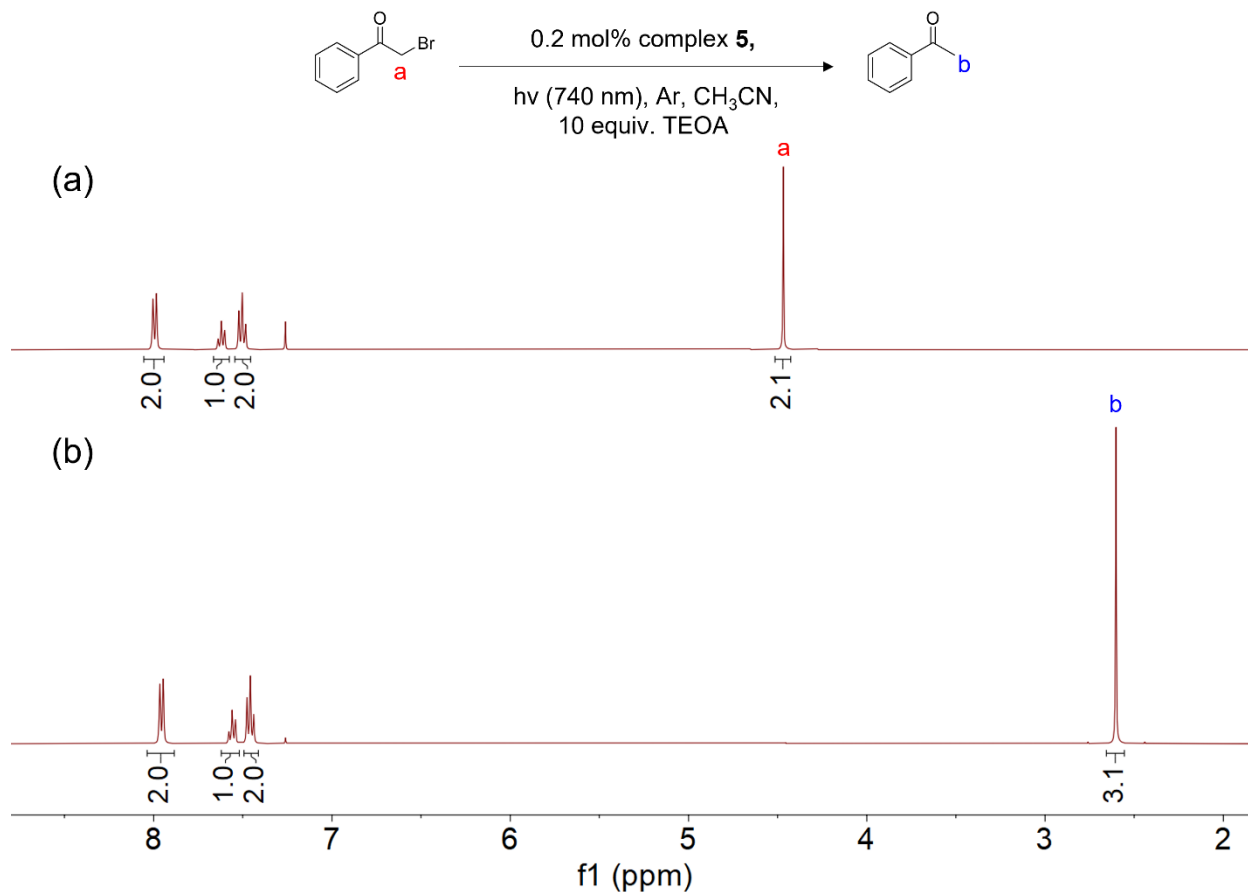

**Supplementary Figure 43.**  $^1\text{H}$  NMR (400 MHz,  $\text{CDCl}_3$ , 298 K) spectra before (a) and after (b) dehalogenation of phenacyl bromide using **5** as the photosensitizer. Condition: 50 mM phenacyl bromide, 10 equiv. TEOA, 0.2 mol% **5**, 5 mL  $\text{CH}_3\text{CN}$ , Ar, 740 nm LEDs, room temperature, 8 h, purified via column chromatography (hexane/ethyl acetate = 100/3).

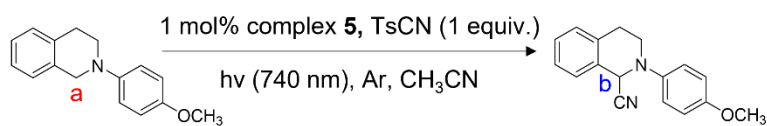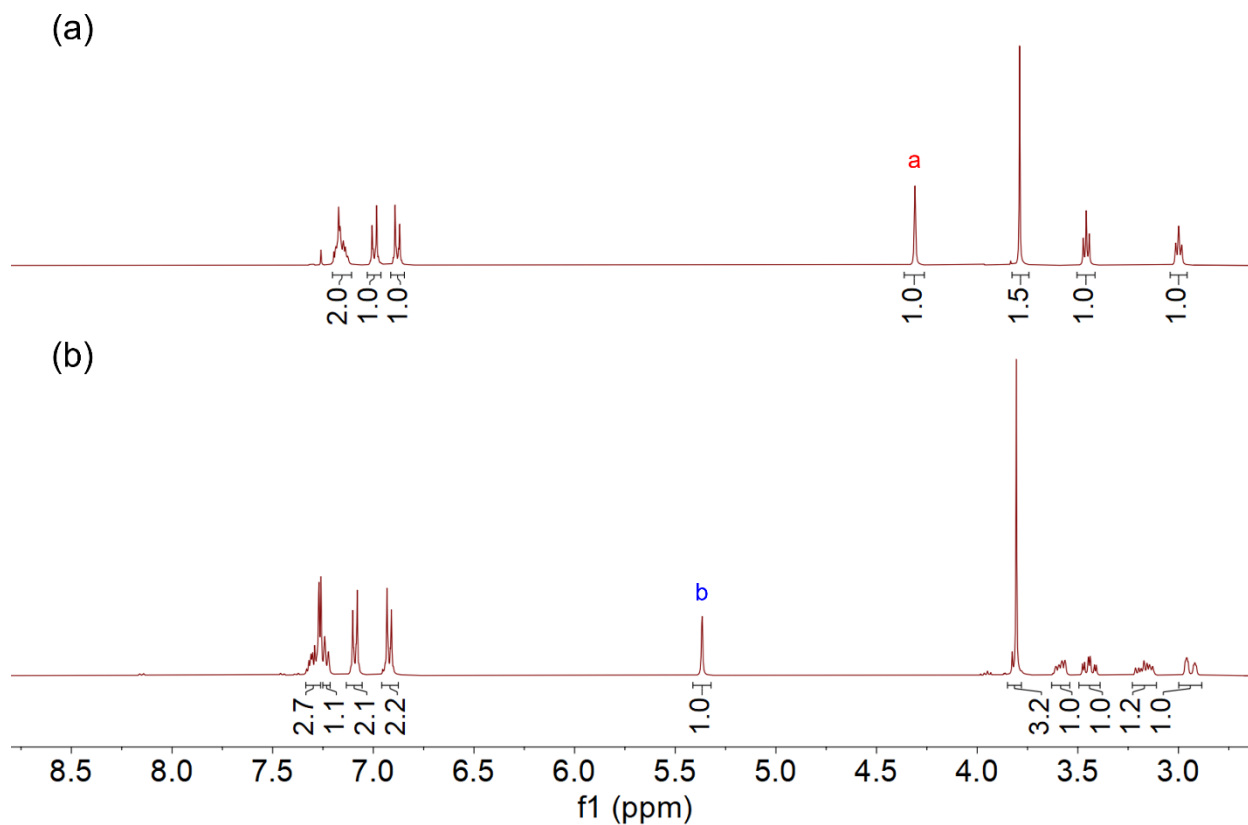

**Supplementary Figure 44.**  $^1\text{H NMR}$  (400 MHz,  $\text{CDCl}_3$ , 298 K) spectra before (a) and after (b) cyanation of tetrahydroisoquinoline using **5** as the photosensitizer. Condition: 50 mM tetrahydroisoquinoline, 1 mol% **5**, 5 mL  $\text{CH}_3\text{CN}$ , Ar, 740 nm LEDs, room temperature, 24 h, purified via column chromatography (hexane/ethyl acetate = 100/3).

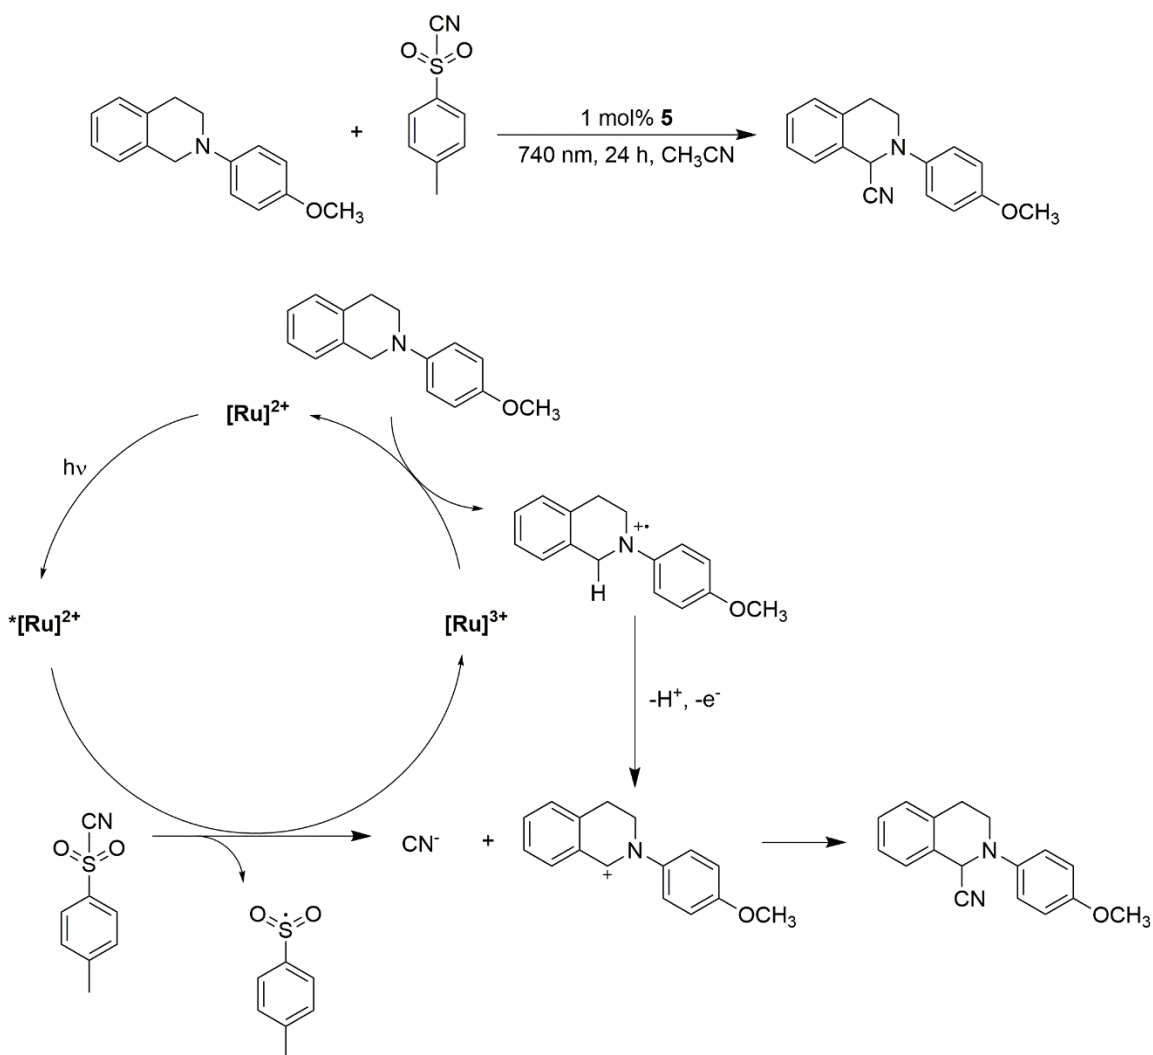

**Supplementary Figure 45.** Proposed photocatalytic cycle of cyanation using **5** as the photosensitizer under 740 nm irradiation. [Ru]<sup>2+</sup> represents **5**.

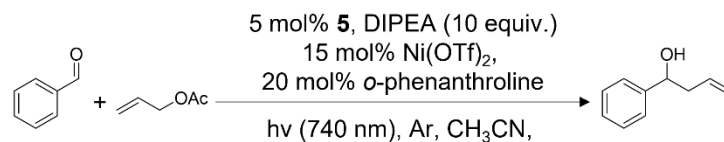

(a)

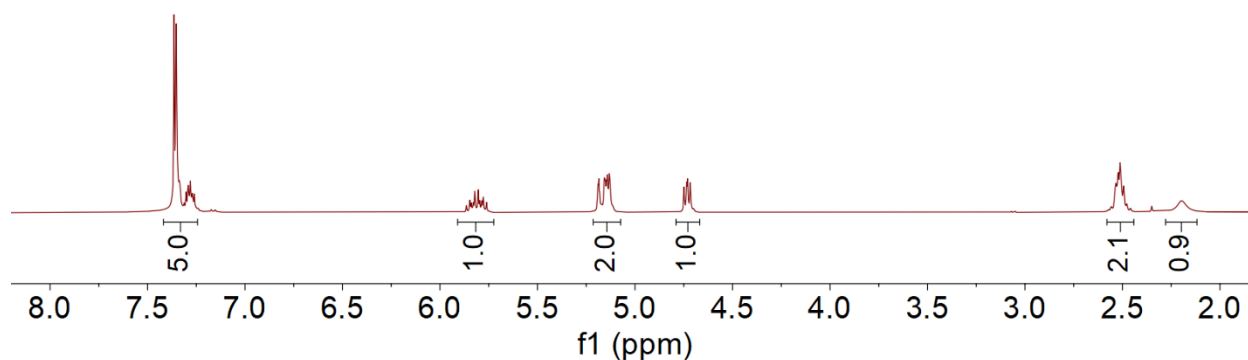

(b)

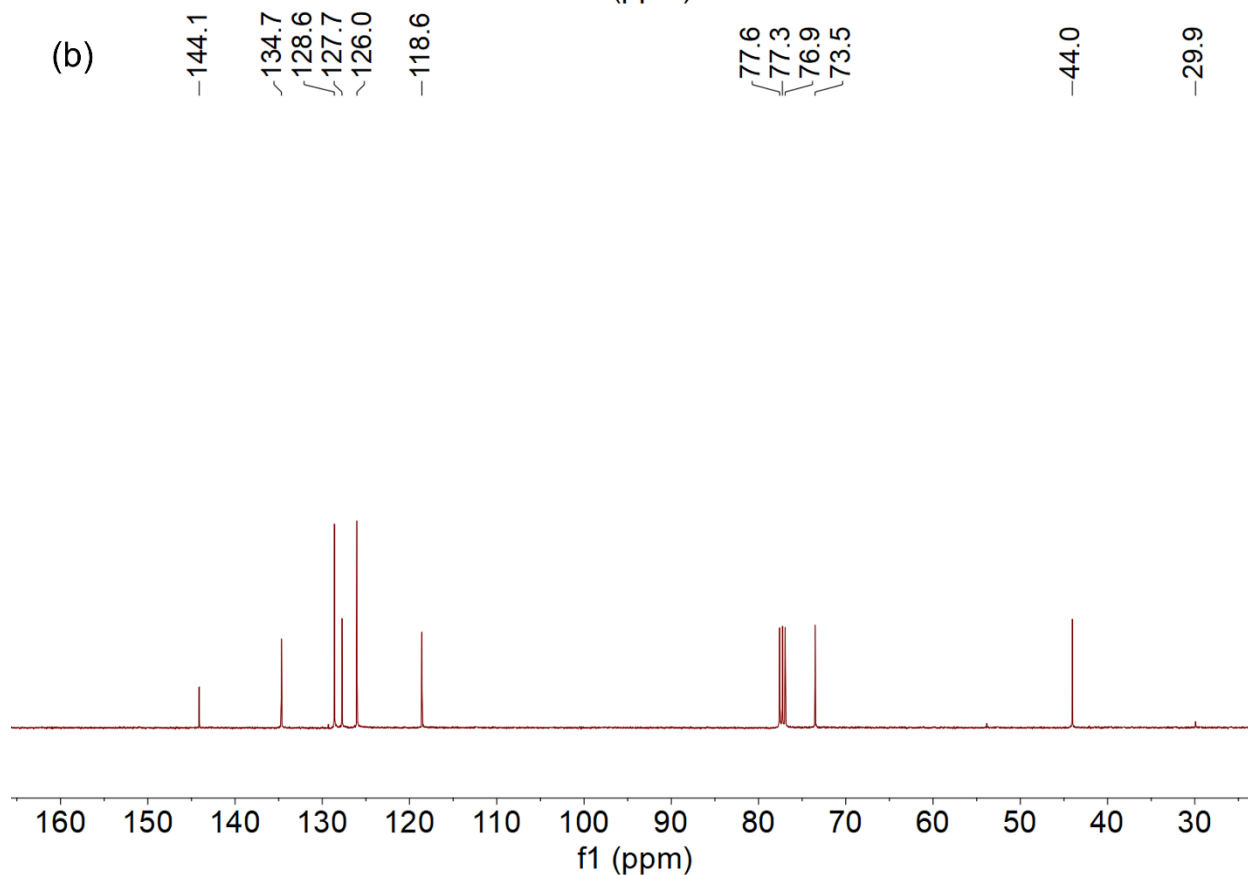

**Supplementary Figure 46.**  $^1\text{H}$  NMR (400 MHz,  $\text{CDCl}_3$ , 298 K) (a) and  $^{13}\text{C}\{^1\text{H}\}$  NMR (101 MHz,  $\text{CDCl}_3$ , 298 K) (b) spectra after C-C coupling between benzaldehyde and allyl acetate using **5** as the photosensitizer and  $\text{Ni}(\text{OTf})_2$  as a cocatalyst. Condition: 50 mM benzaldehyde, 10 equiv. allyl acetate, 5 mol% **5**, 15 mol%  $\text{Ni}(\text{OTf})_2$ , 20 mol% *o*-phenanthroline, 10 equiv. DIPEA, 2 mL  $\text{CH}_3\text{CN}$ , Ar, 740 nm LEDs, room temperature, 72 h, purified via column chromatography (hexane/ethyl acetate = 10/1).

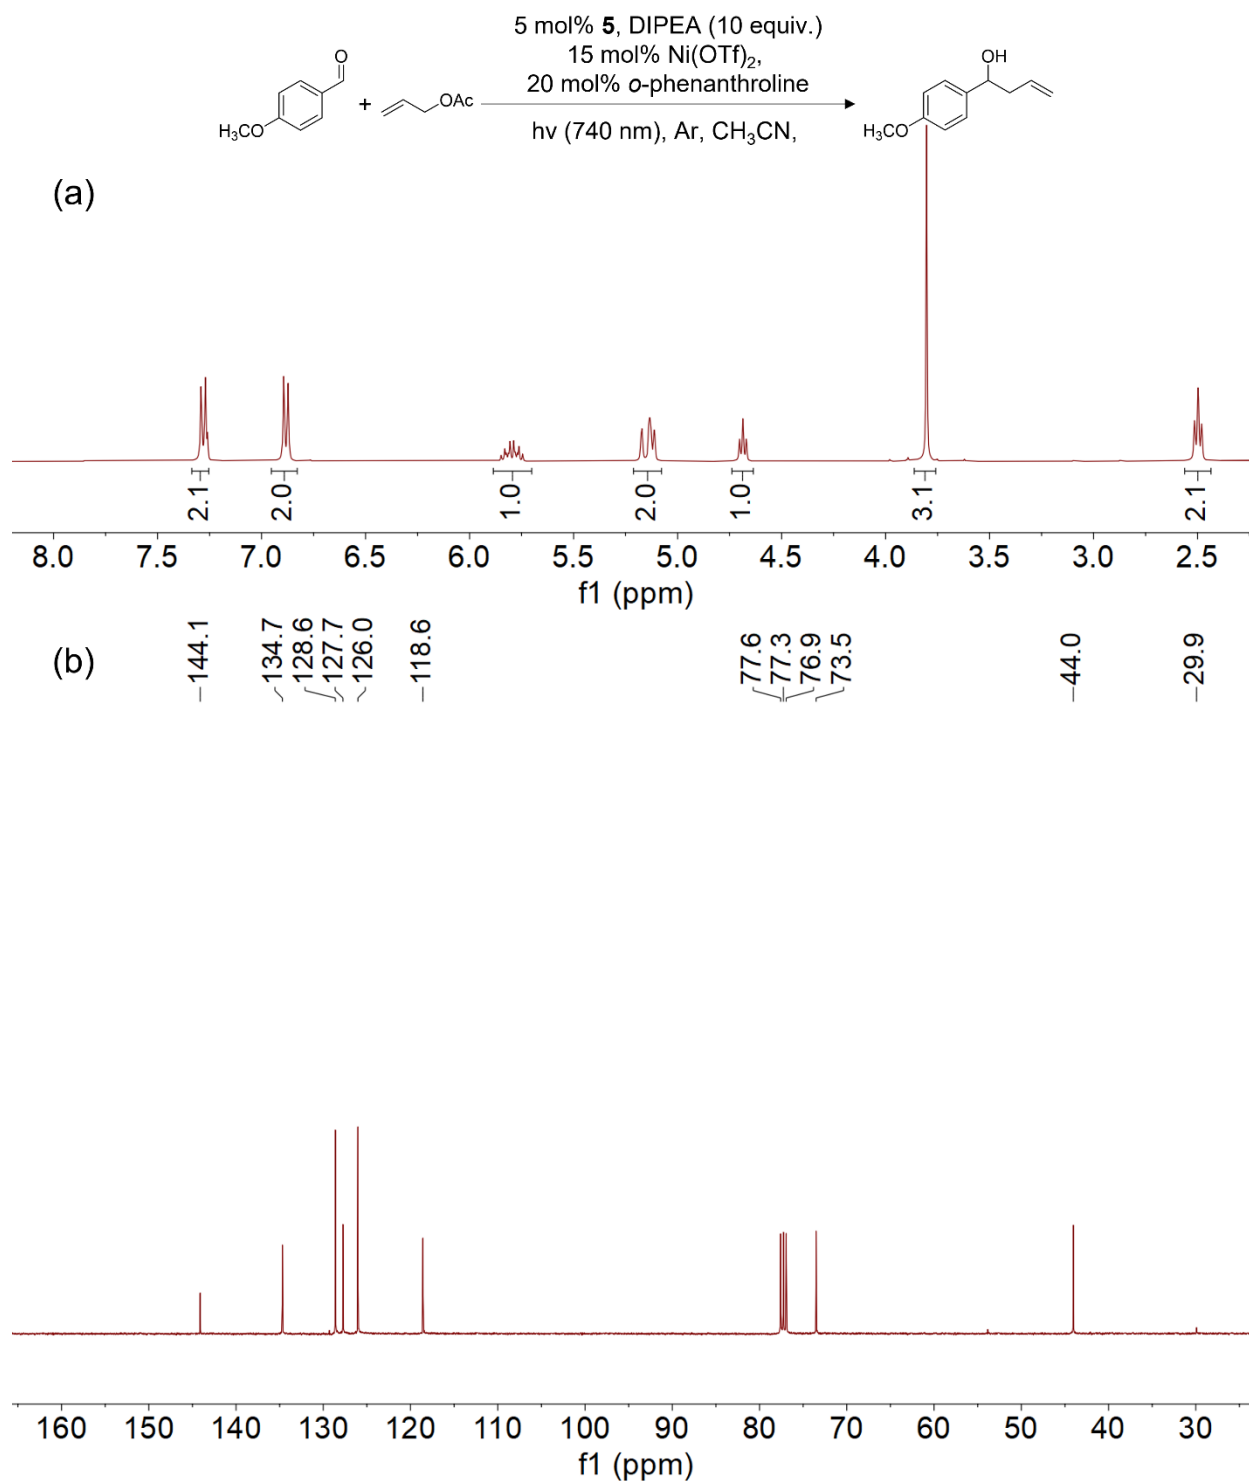

**Supplementary Figure 47.** <sup>1</sup>H NMR (400 MHz, CDCl<sub>3</sub>, 298 K) (a) and <sup>13</sup>C{<sup>1</sup>H} NMR (101 MHz, CDCl<sub>3</sub>, 298 K) (b) spectra after C-C coupling between 4-methoxybenzaldehyde and allyl acetate using **5** as the photosensitizer and Ni(OTf)<sub>2</sub> as a cocatalyst. Condition: 50 mM 4-methoxybenzaldehyde, 10 equiv. allyl acetate, 5 mol% **5**, 15 mol% Ni(OTf)<sub>2</sub>, 20 mol% *o*-phenanthroline, 10 equiv. DIPEA, 2 mL CH<sub>3</sub>CN, Ar, 740 nm LEDs, room temperature, 72 h, purified via column chromatography (hexane/ethyl acetate = 10/1).

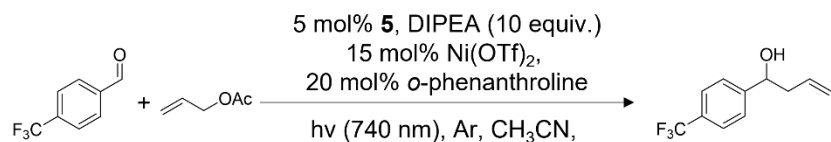

(a)

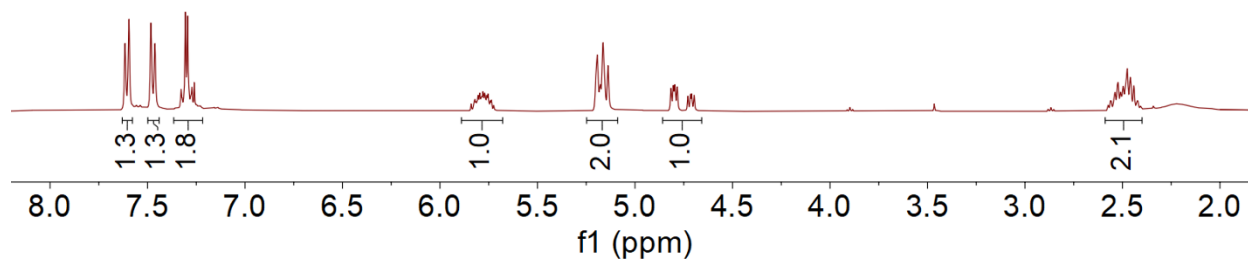

(b)

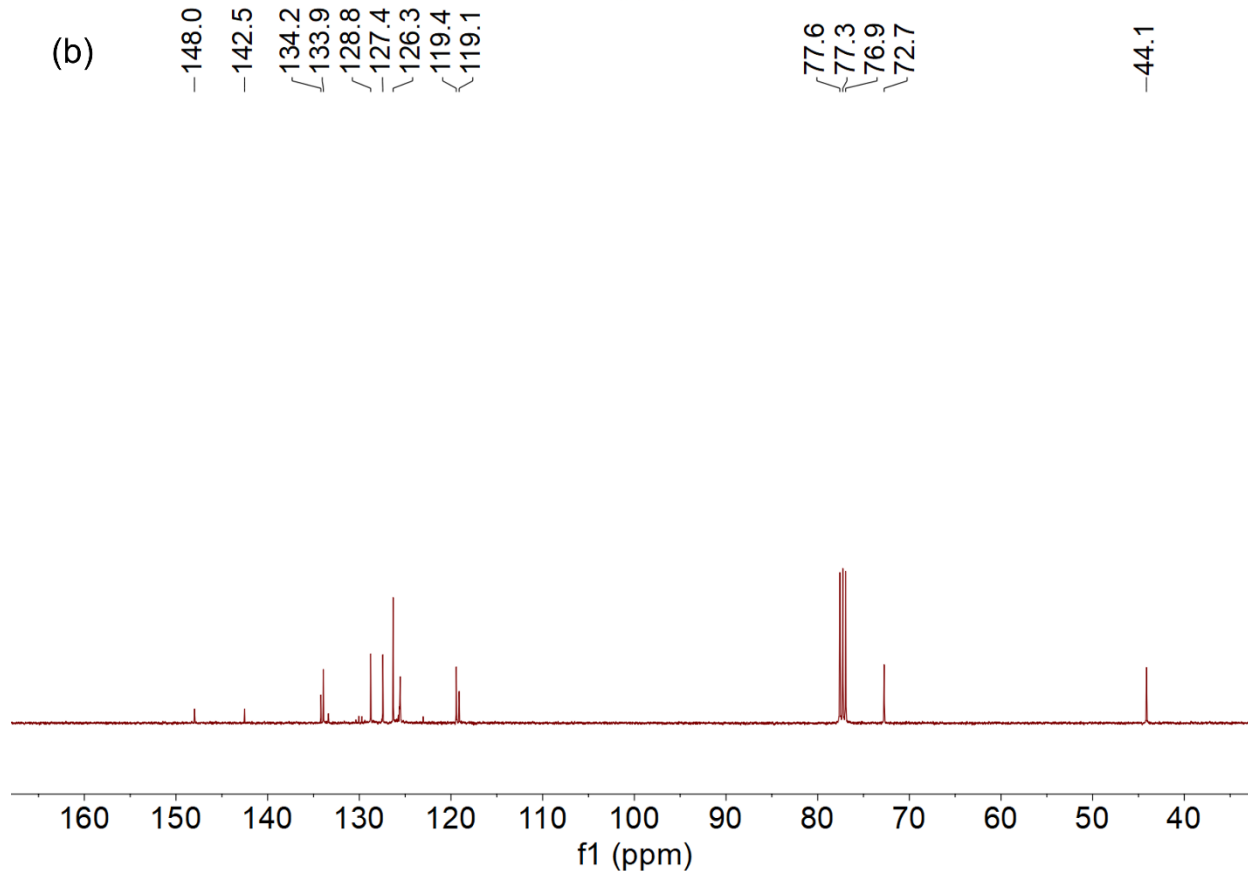

**Supplementary Figure 48.** <sup>1</sup>H NMR (400 MHz, CDCl<sub>3</sub>, 298 K) (a) and <sup>13</sup>C{<sup>1</sup>H} NMR (101 MHz, CDCl<sub>3</sub>, 298 K) (b) spectra after C-C coupling between 4-(trifluoromethyl)benzaldehyde and allyl acetate using **5** as the photosensitizer and Ni(OTf)<sub>2</sub> as a cocatalyst. Condition: 50 mM 4-(trifluoromethyl)benzaldehyde, 10 equiv. allyl acetate, 5 mol% **5**, 15 mol% Ni(OTf)<sub>2</sub>, 20 mol% *o*-phenanthroline, 10 equiv. DIPEA, 2 mL CH<sub>3</sub>CN, Ar, 740 LEDs nm, room temperature, 72 h, purified via column chromatography (hexane/ethyl acetate = 10/1).

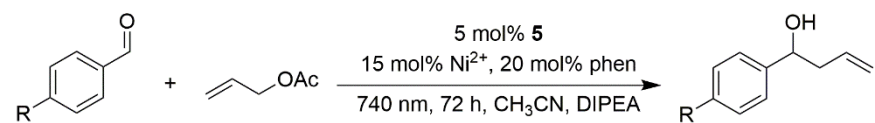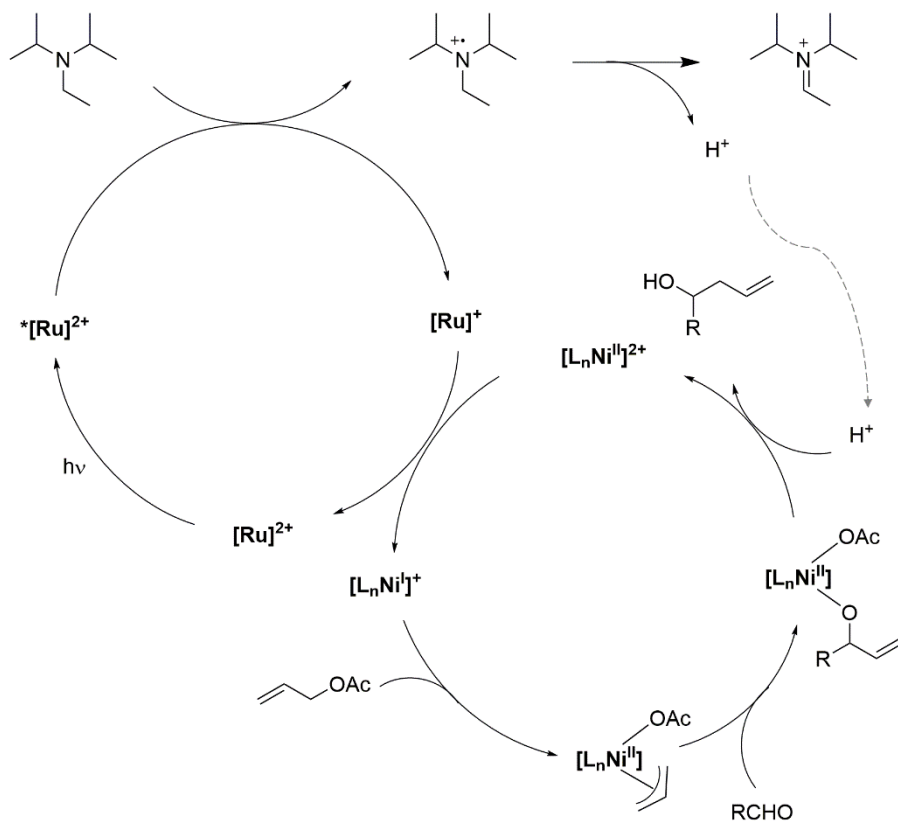

**Supplementary Figure 49.** Proposed photocatalytic cycle of the allylation of aromatic aldehydes using **5** and Ni-cocatalyst under 740 nm irradiation.  $[\text{Ru}]^{2+}$  represents **5**.
